# Supplementary material for: Comparative subgenomic mRNA profiles of SARS-CoV-2 Alpha, Delta and Omicron BA.1, BA.2 and BA.5 sub-lineages using Danish COVID-19 genomic surveillance data
Source: Research Square preprint supplement (doi:10.21203/rs.3.rs-2542939/v1), 2023-02-03
Supplement: Supplementary file 1 [file 552ae25db2c48163664ca944.docx]

Authors Information
List of members of The Danish COVID-19 Genome Consortium

The ordering of affiliation and authors does not reflect any difference in contribution

Anders Fomsgaard1, Morten Rasmussen1, Søren M. Karst1, Jannik Fonager1, Vithiagaran Gunalan1, Marc Bennedbæk1, Aleksander Ring1, Marc Stegger1, Raphael Sieber1, Kirsten Ellegaard1, Anna C. Ingham1, Thor B. Johannesen1, Gitte Nygaard Aasbjerg1, Berit Lilje1,
Kim L. Ng1, Sofie M. Edslev1, Sharmin Baig1, Povilas Matusevicius1, Lars Bustamante Christoffersen1, Man-Hung Eric Tang1, Leandro Andrés Escobar-Herrera1, Casper Westergaard1, Christina Wiid Svarrer1, Nour Saad Al-Tamimi1, Marie Bækvad-Hansen1, Jonas Byberg-Grauholm1, Mette Theilgaard Christiansen1, Karen Marie Jørgensen2, Tobias Nikolaj Gress Hansen2, Esben Mørk Hartmann2, Nicolai Balle Larsen2, Arieh Cohen2, Kasper Holtz Uhre3, Christian Nielsen3, Anders Jensen3, Jakob Matias Melbye3, Bartlomiej Wilkowski3, Karina Meden Sørensen3, Mads Albertsen4, Thomas Y. Michaelsen4, Vang Le-Quy4, Mantas Sereika4, Rasmus H. Kirkegaard4, Kasper S. Andersen4, Martin H. Andersen4, Karsten K. Hansen4, Mads Boye4, Mads P. Bach4, Peter Dissing4, Anton Drastrup-Fjordbak4, Michael Collin4, Finn Büttner4, Jakob Brandt4, Simon Knuttson4, Emil A. Sørensen4, Thomas B. N. Jensen4, Trine Sørensen4, Celine Petersen4, Clarisse Chiche-Lapierre4, Frederik T. Hansen4, Emilio F. Collados4, Amalie Berg4, Susanne R. Bielidt4, Sebastian M. Dall4, Erika Dvarionaite4, Susan H. Hansen4, Vibeke R. Jørgensen4, Trine B. Nicolajsen4, Wagma Saei4, Stine K. Østergaard4, Martin Bøgsted4, Rasmus Brøndu4, Katja Hose4, Tomer Sagi4, Miroslav Pakanec4, Henrik Krarup5, David Fuglsang-Damgaard5, Mette Mølvadgaard5, Marc T. K. Nielsen5, Kristian Schønning6, Martin S. Pedersen6, Rasmus L. Marvig6, Nikolai Kirkby6, Uffe V. Schneider7, Jose A. S. Castruita7, Nana G. Jacobsen7, Christian Ø. Andersen7, Mette Christiansen8, Ole H. Larsen8, Kristian A. Skipper8, Søren Vang8, Kurt J. Handberg8, Carl M. Kobel8, Camilla Andersen8, Irene H. Tarpgaard8, Svend Ellermann-Eriksen8, Marianne Skov9, Thomas V. Sydenham9, Lene Nielsen10, Line L. Nilsson10, Martin B. Friis10 ,Thomas Sundelin10, Thomas A. Hansen10, Dorte T. Andersen11, John E. Coia11, Anders Jensen12, Ea S. Marmolin12, Xiaohui C. Nielsen13, Christian H. Schouw13

1 Statens Serum Institut, Copenhagen, Denmark

2 TestCenter Denmark, Copenhagen, Denmark

3 Danish National Biobank, Copenhagen, Denmark

4 Aalborg University, Aalborg, Denmark

5 Aalborg University Hospital, Aalborg, Denmark

6 Rigshospitalet, Copenhagen University Hospital, Copenhagen, Denmark

7 Hvidovre Hospital, Hvidovre, Denmark

8 Aarhus University Hospital, Aarhus, Denmark

9 Odense University Hospital, Odense, Denmark

10 Herlev Hospital, Herlev, Denmark

11 Sydvestjysk Sygehus, Denmark

12 Sygehus Lillebaelt, Denmark

13 Zealand University Hospital, Denmark

# Additional figures


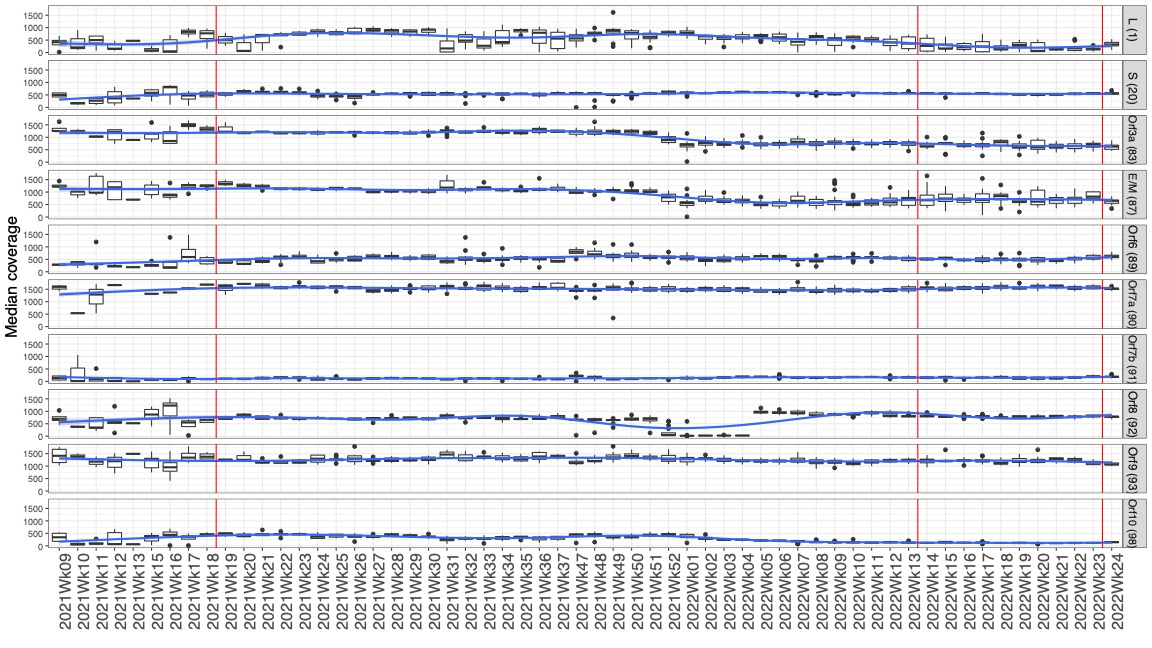


Supplementary figure 1: Overall median amplicon coverage distribution observed across all sequencing runs performed by the Danish COVID-19 genomic surveillance across the sample collection timeline.

Smoothed curved median coverage of selected amplicons covering the 5’-end of the subgenomic mRNAs is shown (amplicon=Leader, 20=S, 83=Orf3a, 87=E/M, 89=Orf6, 9 =Orf7a, 91=Orf7b, 92=Orf8, 93=Orf9, 98=Orf10). The red lines delineate the run periods during which amplicon 1 and 20 showed lower median coverage values (March-April, 2021 and April-May, 2022). Loss of amplicon 92 in January 2022 was caused by the emergence of BA.2 lineage, restauration of amplicon efficiency was achieved using a new primer spike-in.

Supplementary figure 2: Histogram of missing value frequencies.
The missingness reports the fraction of samples with no observations at each subgenomic RNA site and for each lineage. The lineage-subgenomic RNA sample groups further analysed in Figure 5 A-D are marked.

Supplementary figure 3: Principal component analysis biplot of the previous medical conditions of the included cases of the study (n=3,995).

A principal component analysis was performed on the occurrence in the past five years of a list of diseases and the first two leading components shown in a biplot. Cases were colored according to the lineage of SARS-CoV-2 genome isolated in the subjects.

Supplementary figure 4: Subgenomic mRNA abundance across Alpha, Delta and Omicron SARS-CoV-2 lineages across the entire sample collection period.
This boxplot shows sample groups collected during the non-included time window Mars-April 2021 and April-May 2022 time points. Non-included samples consist of 64 Alpha, 1 Delta, 12 BA.1, 348 BA.2, 1,329 BA2.12.1, 729 BA.4 and 2,144 BA.5 lineages. Late BA.5 corresponds to the BA5 sample group in Figure 2 while BA.5 designates the samples collected in April-May 2022.

Supplementary figure 5: Median coverage of amplicon covering the Leader and each ORF of interest, stratified by lineage. Top: median coverage values normalized to 2-million total reads. Bottom: non-normalized median coverage values.

Supplementary figure 6: Variable importance plot of the most significant factors associated with subgenomic mRNA count per 2 million excluding sparse variables from the STPS (Danish Patient Safety Authority) and RUKS (Chronic Diseases and Severe Mental) and data sources.

Variables selected by 10-fold cross-validated elastic-net for association with subgenomic mRNA levels are shown in their order of importance, repeated 50 times. The analysis on the largest available population after excluding sparse variables from STPS and RUKS was performed on 11365 samples.
