# Supplementary material for: Comparative subgenomic mRNA profiles of SARS-CoV-2 Alpha, Delta and Omicron BA.1, BA.2 and BA.5 sub-lineages using Danish COVID-19 genomic surveillance data
Source: Research Square preprint supplement (doi:10.21203/rs.3.rs-2542939/v1), 2023-02-03
Supplement: Supplementary file 2 [file a42e9bfb27f6a552ffbf19fe.xlsx]

## Sheet: boxplot_summarystats_suppltable
Subgenomic RNA	Lineage group	Median( count per 2 million)	Standard Deviation	Min	Max
S	Alpha	4.441	3.328	1.044	36.183
S	Delta	1.901	2.735	0.554	42.476
S	Late Delta	1.874	2.21	0.549	22.949
S	BA.1	2.901	2.779	0.446	22.603
S	BA.2	2.469	3.427	0.646	44.698
S	BA.5	3.212	3.678	0.32	46.989
ORF3a	Alpha	1.969	0.777	1.014	8.859
ORF3a	Delta	1.063	0.798	0.542	16.561
ORF3a	Late Delta	0.941	0.716	0.542	7.945
ORF3a	BA.1	1.27	0.934	0.436	9.525
ORF3a	BA.2	1.051	0.997	0.625	33.852
ORF3a	BA.5	1.337	1.105	0.265	15.663
E (Enveloppe)	Alpha	2.068	1.363	1.014	11.751
E (Enveloppe)	Delta	1.259	0.995	0.547	9.876
E (Enveloppe)	Late Delta	1.054	0.986	0.544	14.101
E (Enveloppe)	BA.1	1.152	0.839	0.335	9.945
E (Enveloppe)	BA.2	1.035	0.687	0.625	8.173
E (Enveloppe)	BA.5	1.304	1.081	0.265	15.663
M (Membrane)	Alpha	8.927	6.664	1.087	48.937
M (Membrane)	Delta	4.386	5.092	0.576	56.623
M (Membrane)	Late Delta	4.382	4.875	0.549	44.232
M (Membrane)	BA.1	1.532	2.033	0.446	53.395
M (Membrane)	BA.2	1.414	1.821	0.643	30.949
M (Membrane)	BA.5	1.966	2.26	0.302	23.052
ORF6	Alpha	4.427	4.08	1.054	33.165
ORF6	Delta	2.069	3.026	0.568	27.221
ORF6	Late Delta	2.099	3.114	0.551	30.397
ORF6	BA.1	2.37	3.492	0.452	42.074
ORF6	BA.2	2.242	3.588	0.646	49.293
ORF6	BA.5	2.093	2.749	0.302	23.538
ORF7a	Alpha	1.988	1.352	1.014	31.767
ORF7a	Delta	1.088	1.003	0.542	13.003
ORF7a	Late Delta	0.977	1.273	0.542	20.368
ORF7a	BA.1	1.452	2.439	0.436	64.855
ORF7a	BA.2	1.139	1.472	0.625	37.55
ORF7a	BA.5	1.621	2.316	0.265	74.155
ORF8	Alpha	1.983	0.856	1.014	8.617
ORF8	Delta	0.987	0.513	0.547	4.285
ORF8	Late Delta	0.883	0.572	0.542	11.227
ORF8	BA.1	1.201	1.152	0.335	19.883
ORF8	BA.2	1.011	0.67	0.625	9.608
ORF8	BA.5	1.152	0.94	0.265	15.663
ORF9 (Nucleoprotein and 3' open reading frames)	Alpha	6.074	11.482	1.044	165.105
ORF9 (Nucleoprotein and 3' open reading frames)	Delta	4.719	10.557	0.591	192.047
ORF9 (Nucleoprotein and 3' open reading frames)	Late Delta	4.962	9.614	0.571	119.591
ORF9 (Nucleoprotein and 3' open reading frames)	BA.1	6.348	12.441	0.596	219.938
ORF9 (Nucleoprotein and 3' open reading frames)	BA.2	5.648	16.166	0.66	153.935
ORF9 (Nucleoprotein and 3' open reading frames)	BA.5	7.434	13.32	0.436	179.684
