# Supplementary material for: Comparative subgenomic mRNA profiles of SARS-CoV-2 Alpha, Delta and Omicron BA.1, BA.2 and BA.5 sub-lineages using Danish COVID-19 genomic surveillance data
Source: Research Square preprint supplement (doi:10.21203/rs.3.rs-2542939/v1), 2023-02-03
Supplement: Supplementary file 3 [file c0ae4fb0894de82bc1097712.xlsx]

## Sheet: list_of_samples_12324_by_gisaid
Sample alias	EPI_ISL_ID	EPI_SET_ID	Lineage group	Sample collection date
hCoV-19/Denmark/DCGC-104138/2021	EPI_ISL_3075281	EPI_SET_230103mu	Alpha	2021-05-24
hCoV-19/Denmark/DCGC-104169/2021	EPI_ISL_2679102	EPI_SET_230103mu	Alpha	2021-05-24
hCoV-19/Denmark/DCGC-104195/2021	EPI_ISL_2679128	EPI_SET_230103mu	Alpha	2021-05-24
hCoV-19/Denmark/DCGC-104378/2021	EPI_ISL_2679214	EPI_SET_230103mu	Alpha	2021-05-17
hCoV-19/Denmark/DCGC-104389/2021	EPI_ISL_2679223	EPI_SET_230103mu	Alpha	2021-05-24
hCoV-19/Denmark/DCGC-104449/2021	EPI_ISL_2679259	EPI_SET_230103mu	Alpha	2021-05-24
hCoV-19/Denmark/DCGC-104453/2021	EPI_ISL_2679264	EPI_SET_230103mu	Alpha	2021-05-24
hCoV-19/Denmark/DCGC-104562/2021	EPI_ISL_2429454	EPI_SET_230103mu	Alpha	2021-05-24
hCoV-19/Denmark/DCGC-104564/2021	EPI_ISL_2679325	EPI_SET_230103mu	Alpha	2021-05-24
hCoV-19/Denmark/DCGC-104580/2021	EPI_ISL_2429461	EPI_SET_230103mu	Alpha	2021-05-24
hCoV-19/Denmark/DCGC-104584/2021	EPI_ISL_2679331	EPI_SET_230103mu	Alpha	2021-05-24
hCoV-19/Denmark/DCGC-104592/2021	EPI_ISL_2679340	EPI_SET_230103mu	Alpha	2021-05-24
hCoV-19/Denmark/DCGC-104703/2021	EPI_ISL_2679394	EPI_SET_230103mu	Alpha	2021-05-24
hCoV-19/Denmark/DCGC-104725/2021	EPI_ISL_2679407	EPI_SET_230103mu	Alpha	2021-05-24
hCoV-19/Denmark/DCGC-104736/2021	EPI_ISL_2679410	EPI_SET_230103mu	Alpha	2021-05-17
hCoV-19/Denmark/DCGC-104852/2021	EPI_ISL_2679463	EPI_SET_230103mu	Alpha	2021-05-24
hCoV-19/Denmark/DCGC-104894/2021	EPI_ISL_2679482	EPI_SET_230103mu	Alpha	2021-05-17
hCoV-19/Denmark/DCGC-104942/2021	EPI_ISL_2679501	EPI_SET_230103mu	Alpha	2021-05-24
hCoV-19/Denmark/DCGC-105076/2021	EPI_ISL_2679584	EPI_SET_230103mu	Alpha	2021-05-17
hCoV-19/Denmark/DCGC-105096/2021	EPI_ISL_2679595	EPI_SET_230103mu	Alpha	2021-05-24
hCoV-19/Denmark/DCGC-105220/2021	EPI_ISL_2679672	EPI_SET_230103mu	Alpha	2021-05-24
hCoV-19/Denmark/DCGC-105221/2021	EPI_ISL_3075310	EPI_SET_230103mu	Alpha	2021-05-24
hCoV-19/Denmark/DCGC-105247/2021	EPI_ISL_2679692	EPI_SET_230103mu	Alpha	2021-05-17
hCoV-19/Denmark/DCGC-105271/2021	EPI_ISL_2429847	EPI_SET_230103mu	Alpha	2021-05-24
hCoV-19/Denmark/DCGC-105345/2021	EPI_ISL_2429894	EPI_SET_230103mu	Alpha	2021-05-17
hCoV-19/Denmark/DCGC-105386/2021	EPI_ISL_3075316	EPI_SET_230103mu	Alpha	2021-05-24
hCoV-19/Denmark/DCGC-105556/2021	EPI_ISL_2430011	EPI_SET_230103mu	Alpha	2021-05-24
hCoV-19/Denmark/DCGC-105562/2021	EPI_ISL_2679814	EPI_SET_230103mu	Alpha	2021-05-17
hCoV-19/Denmark/DCGC-105647/2021	EPI_ISL_3075328	EPI_SET_230103mu	Alpha	2021-05-24
hCoV-19/Denmark/DCGC-105681/2021	EPI_ISL_3075330	EPI_SET_230103mu	Alpha	2021-05-24
hCoV-19/Denmark/DCGC-105696/2021	EPI_ISL_2679843	EPI_SET_230103mu	Alpha	2021-05-24
hCoV-19/Denmark/DCGC-105711/2021	EPI_ISL_2679848	EPI_SET_230103mu	Alpha	2021-05-03
hCoV-19/Denmark/DCGC-105751/2021	EPI_ISL_2679855	EPI_SET_230103mu	Alpha	2021-05-17
hCoV-19/Denmark/DCGC-105895/2021	EPI_ISL_2679892	EPI_SET_230103mu	Alpha	2021-05-17
hCoV-19/Denmark/DCGC-105905/2021	EPI_ISL_2679897	EPI_SET_230103mu	Alpha	2021-05-24
hCoV-19/Denmark/DCGC-106052/2021	EPI_ISL_2430301	EPI_SET_230103mu	Alpha	2021-05-24
hCoV-19/Denmark/DCGC-106173/2021	EPI_ISL_2679961	EPI_SET_230103mu	Alpha	2021-05-10
hCoV-19/Denmark/DCGC-106285/2021	EPI_ISL_2679983	EPI_SET_230103mu	Alpha	2021-05-17
hCoV-19/Denmark/DCGC-106302/2021	EPI_ISL_3075359	EPI_SET_230103mu	Alpha	2021-05-24
hCoV-19/Denmark/DCGC-106326/2021	EPI_ISL_2679993	EPI_SET_230103mu	Alpha	2021-05-17
hCoV-19/Denmark/DCGC-106404/2021	EPI_ISL_2430501	EPI_SET_230103mu	Alpha	2021-05-24
hCoV-19/Denmark/DCGC-106477/2021	EPI_ISL_2680033	EPI_SET_230103mu	Alpha	2021-05-24
hCoV-19/Denmark/DCGC-106509/2021	EPI_ISL_2430561	EPI_SET_230103mu	Alpha	2021-05-17
hCoV-19/Denmark/DCGC-106614/2021	EPI_ISL_3075369	EPI_SET_230103mu	Alpha	2021-05-24
hCoV-19/Denmark/DCGC-106707/2021	EPI_ISL_2680086	EPI_SET_230103mu	Alpha	2021-05-24
hCoV-19/Denmark/DCGC-106722/2021	EPI_ISL_2430686	EPI_SET_230103mu	Alpha	2021-05-24
hCoV-19/Denmark/DCGC-106759/2021	EPI_ISL_2680100	EPI_SET_230103mu	Alpha	2021-05-17
hCoV-19/Denmark/DCGC-106837/2021	EPI_ISL_2680112	EPI_SET_230103mu	Alpha	2021-05-24
hCoV-19/Denmark/DCGC-106986/2021	EPI_ISL_2680148	EPI_SET_230103mu	Alpha	2021-05-24
hCoV-19/Denmark/DCGC-107048/2021	EPI_ISL_2680159	EPI_SET_230103mu	Alpha	2021-05-24
hCoV-19/Denmark/DCGC-107099/2021	EPI_ISL_2680177	EPI_SET_230103mu	Alpha	2021-05-24
hCoV-19/Denmark/DCGC-107158/2021	EPI_ISL_2430931	EPI_SET_230103mu	Alpha	2021-05-24
hCoV-19/Denmark/DCGC-107166/2021	EPI_ISL_2680193	EPI_SET_230103mu	Alpha	2021-05-24
hCoV-19/Denmark/DCGC-107174/2021	EPI_ISL_3075396	EPI_SET_230103mu	Alpha	2021-05-24
hCoV-19/Denmark/DCGC-107184/2021	EPI_ISL_2680195	EPI_SET_230103mu	Alpha	2021-05-17
hCoV-19/Denmark/DCGC-107190/2021	EPI_ISL_2680198	EPI_SET_230103mu	Alpha	2021-05-17
hCoV-19/Denmark/DCGC-107263/2021	EPI_ISL_3075401	EPI_SET_230103mu	Alpha	2021-05-24
hCoV-19/Denmark/DCGC-107343/2021	EPI_ISL_3075409	EPI_SET_230103mu	Alpha	2021-05-24
hCoV-19/Denmark/DCGC-107358/2021	EPI_ISL_2431057	EPI_SET_230103mu	Alpha	2021-05-24
hCoV-19/Denmark/DCGC-107365/2021	EPI_ISL_3075410	EPI_SET_230103mu	Alpha	2021-05-24
hCoV-19/Denmark/DCGC-107405/2021	EPI_ISL_2431082	EPI_SET_230103mu	Alpha	2021-05-17
hCoV-19/Denmark/DCGC-107525/2021	EPI_ISL_2680289	EPI_SET_230103mu	Alpha	2021-05-24
hCoV-19/Denmark/DCGC-107636/2021	EPI_ISL_3075424	EPI_SET_230103mu	Alpha	2021-05-24
hCoV-19/Denmark/DCGC-107661/2021	EPI_ISL_3075425	EPI_SET_230103mu	Alpha	2021-05-24
hCoV-19/Denmark/DCGC-107725/2021	EPI_ISL_2431266	EPI_SET_230103mu	Alpha	2021-05-24
hCoV-19/Denmark/DCGC-107816/2021	EPI_ISL_2680362	EPI_SET_230103mu	Alpha	2021-05-24
hCoV-19/Denmark/DCGC-107825/2021	EPI_ISL_2680367	EPI_SET_230103mu	Alpha	2021-05-24
hCoV-19/Denmark/DCGC-107868/2021	EPI_ISL_2680381	EPI_SET_230103mu	Alpha	2021-05-24
hCoV-19/Denmark/DCGC-107921/2021	EPI_ISL_2680398	EPI_SET_230103mu	Alpha	2021-05-24
hCoV-19/Denmark/DCGC-107941/2021	EPI_ISL_2431388	EPI_SET_230103mu	Alpha	2021-05-17
hCoV-19/Denmark/DCGC-108003/2021	EPI_ISL_2680412	EPI_SET_230103mu	Alpha	2021-05-24
hCoV-19/Denmark/DCGC-108011/2021	EPI_ISL_2680415	EPI_SET_230103mu	Alpha	2021-05-17
hCoV-19/Denmark/DCGC-108016/2021	EPI_ISL_2680416	EPI_SET_230103mu	Alpha	2021-05-24
hCoV-19/Denmark/DCGC-108029/2021	EPI_ISL_2431435	EPI_SET_230103mu	Alpha	2021-05-24
hCoV-19/Denmark/DCGC-108114/2021	EPI_ISL_3075437	EPI_SET_230103mu	Alpha	2021-05-24
hCoV-19/Denmark/DCGC-108144/2021	EPI_ISL_2431503	EPI_SET_230103mu	Alpha	2021-05-24
hCoV-19/Denmark/DCGC-108162/2021	EPI_ISL_2680446	EPI_SET_230103mu	Alpha	2021-05-24
hCoV-19/Denmark/DCGC-108301/2021	EPI_ISL_2431590	EPI_SET_230103mu	Alpha	2021-05-24
hCoV-19/Denmark/DCGC-108326/2021	EPI_ISL_2680494	EPI_SET_230103mu	Alpha	2021-05-17
hCoV-19/Denmark/DCGC-108387/2021	EPI_ISL_2680508	EPI_SET_230103mu	Alpha	2021-05-24
hCoV-19/Denmark/DCGC-108471/2021	EPI_ISL_2680527	EPI_SET_230103mu	Alpha	2021-05-17
hCoV-19/Denmark/DCGC-108570/2021	EPI_ISL_2680544	EPI_SET_230103mu	Alpha	2021-05-24
hCoV-19/Denmark/DCGC-108700/2021	EPI_ISL_2680574	EPI_SET_230103mu	Alpha	2021-05-17
hCoV-19/Denmark/DCGC-108839/2021	EPI_ISL_2680605	EPI_SET_230103mu	Alpha	2021-05-24
hCoV-19/Denmark/DCGC-108964/2021	EPI_ISL_2680640	EPI_SET_230103mu	Alpha	2021-05-17
hCoV-19/Denmark/DCGC-109044/2021	EPI_ISL_3075474	EPI_SET_230103mu	Alpha	2021-05-24
hCoV-19/Denmark/DCGC-109079/2021	EPI_ISL_2680669	EPI_SET_230103mu	Alpha	2021-05-24
hCoV-19/Denmark/DCGC-109091/2021	EPI_ISL_2680674	EPI_SET_230103mu	Alpha	2021-05-17
hCoV-19/Denmark/DCGC-109153/2021	EPI_ISL_3075478	EPI_SET_230103mu	Alpha	2021-05-24
hCoV-19/Denmark/DCGC-109215/2021	EPI_ISL_2680699	EPI_SET_230103mu	Alpha	2021-05-24
hCoV-19/Denmark/DCGC-109539/2021	EPI_ISL_3075494	EPI_SET_230103mu	Alpha	2021-05-24
hCoV-19/Denmark/DCGC-109545/2021	EPI_ISL_3075496	EPI_SET_230103mu	Alpha	2021-05-24
hCoV-19/Denmark/DCGC-109839/2021	EPI_ISL_2680841	EPI_SET_230103mu	Alpha	2021-05-24
hCoV-19/Denmark/DCGC-109907/2021	EPI_ISL_2432502	EPI_SET_230103mu	Alpha	2021-05-17
hCoV-19/Denmark/DCGC-109912/2021	EPI_ISL_3075511	EPI_SET_230103mu	Alpha	2021-05-24
hCoV-19/Denmark/DCGC-109926/2021	EPI_ISL_2680862	EPI_SET_230103mu	Alpha	2021-05-24
hCoV-19/Denmark/DCGC-110073/2021	EPI_ISL_2675393	EPI_SET_230103mu	Alpha	2021-05-31
hCoV-19/Denmark/DCGC-110080/2021	EPI_ISL_3074112	EPI_SET_230103mu	Alpha	2021-05-31
hCoV-19/Denmark/DCGC-110081/2021	EPI_ISL_2675396	EPI_SET_230103mu	Alpha	2021-05-31
hCoV-19/Denmark/DCGC-110084/2021	EPI_ISL_2675398	EPI_SET_230103mu	Alpha	2021-05-31
hCoV-19/Denmark/DCGC-110087/2021	EPI_ISL_2675401	EPI_SET_230103mu	Alpha	2021-05-31
hCoV-19/Denmark/DCGC-110091/2021	EPI_ISL_2675404	EPI_SET_230103mu	Alpha	2021-06-07
hCoV-19/Denmark/DCGC-110107/2021	EPI_ISL_2675416	EPI_SET_230103mu	Alpha	2021-05-31
hCoV-19/Denmark/DCGC-110111/2021	EPI_ISL_2675420	EPI_SET_230103mu	Alpha	2021-05-31
hCoV-19/Denmark/DCGC-110116/2021	EPI_ISL_2675422	EPI_SET_230103mu	Alpha	2021-05-31
hCoV-19/Denmark/DCGC-110118/2021	EPI_ISL_3074116	EPI_SET_230103mu	Alpha	2021-06-07
hCoV-19/Denmark/DCGC-110140/2021	EPI_ISL_2675439	EPI_SET_230103mu	Alpha	2021-06-07
hCoV-19/Denmark/DCGC-110142/2021	EPI_ISL_2675441	EPI_SET_230103mu	Alpha	2021-05-31
hCoV-19/Denmark/DCGC-110145/2021	EPI_ISL_2675444	EPI_SET_230103mu	Alpha	2021-06-07
hCoV-19/Denmark/DCGC-110160/2021	EPI_ISL_3074121	EPI_SET_230103mu	Alpha	2021-06-07
hCoV-19/Denmark/DCGC-110163/2021	EPI_ISL_2675454	EPI_SET_230103mu	Alpha	2021-05-31
hCoV-19/Denmark/DCGC-110165/2021	EPI_ISL_2675456	EPI_SET_230103mu	Alpha	2021-06-07
hCoV-19/Denmark/DCGC-110168/2021	EPI_ISL_2675459	EPI_SET_230103mu	Alpha	2021-05-31
hCoV-19/Denmark/DCGC-110175/2021	EPI_ISL_2675463	EPI_SET_230103mu	Alpha	2021-05-31
hCoV-19/Denmark/DCGC-110185/2021	EPI_ISL_3074124	EPI_SET_230103mu	Alpha	2021-05-31
hCoV-19/Denmark/DCGC-110189/2021	EPI_ISL_2675470	EPI_SET_230103mu	Alpha	2021-05-31
hCoV-19/Denmark/DCGC-110192/2021	EPI_ISL_2675473	EPI_SET_230103mu	Alpha	2021-06-07
hCoV-19/Denmark/DCGC-110201/2021	EPI_ISL_2675480	EPI_SET_230103mu	Alpha	2021-05-31
hCoV-19/Denmark/DCGC-110210/2021	EPI_ISL_2675488	EPI_SET_230103mu	Alpha	2021-06-07
hCoV-19/Denmark/DCGC-110213/2021	EPI_ISL_2675491	EPI_SET_230103mu	Alpha	2021-05-31
hCoV-19/Denmark/DCGC-110214/2021	EPI_ISL_2675492	EPI_SET_230103mu	Alpha	2021-06-07
hCoV-19/Denmark/DCGC-110215/2021	EPI_ISL_3074126	EPI_SET_230103mu	Alpha	2021-05-31
hCoV-19/Denmark/DCGC-110220/2021	EPI_ISL_3074128	EPI_SET_230103mu	Alpha	2021-06-07
hCoV-19/Denmark/DCGC-110230/2021	EPI_ISL_2675500	EPI_SET_230103mu	Alpha	2021-05-31
hCoV-19/Denmark/DCGC-110236/2021	EPI_ISL_3074132	EPI_SET_230103mu	Alpha	2021-05-31
hCoV-19/Denmark/DCGC-110245/2021	EPI_ISL_2675510	EPI_SET_230103mu	Alpha	2021-05-31
hCoV-19/Denmark/DCGC-110258/2021	EPI_ISL_3074138	EPI_SET_230103mu	Alpha	2021-05-31
hCoV-19/Denmark/DCGC-110259/2021	EPI_ISL_3074139	EPI_SET_230103mu	Alpha	2021-05-31
hCoV-19/Denmark/DCGC-110268/2021	EPI_ISL_3074141	EPI_SET_230103mu	Alpha	2021-05-31
hCoV-19/Denmark/DCGC-110273/2021	EPI_ISL_2675525	EPI_SET_230103mu	Alpha	2021-06-07
hCoV-19/Denmark/DCGC-110276/2021	EPI_ISL_3074143	EPI_SET_230103mu	Alpha	2021-05-31
hCoV-19/Denmark/DCGC-110279/2021	EPI_ISL_3074144	EPI_SET_230103mu	Alpha	2021-05-24
hCoV-19/Denmark/DCGC-110293/2021	EPI_ISL_3074145	EPI_SET_230103mu	Alpha	2021-05-31
hCoV-19/Denmark/DCGC-110294/2021	EPI_ISL_2675542	EPI_SET_230103mu	Alpha	2021-06-07
hCoV-19/Denmark/DCGC-110297/2021	EPI_ISL_2675544	EPI_SET_230103mu	Alpha	2021-05-31
hCoV-19/Denmark/DCGC-110299/2021	EPI_ISL_3074146	EPI_SET_230103mu	Alpha	2021-05-31
hCoV-19/Denmark/DCGC-110301/2021	EPI_ISL_3074147	EPI_SET_230103mu	Alpha	2021-05-31
hCoV-19/Denmark/DCGC-110302/2021	EPI_ISL_2675547	EPI_SET_230103mu	Alpha	2021-05-31
hCoV-19/Denmark/DCGC-110304/2021	EPI_ISL_3074148	EPI_SET_230103mu	Alpha	2021-06-07
hCoV-19/Denmark/DCGC-110306/2021	EPI_ISL_2675549	EPI_SET_230103mu	Alpha	2021-06-07
hCoV-19/Denmark/DCGC-110307/2021	EPI_ISL_3074149	EPI_SET_230103mu	Alpha	2021-05-31
hCoV-19/Denmark/DCGC-110312/2021	EPI_ISL_2675554	EPI_SET_230103mu	Alpha	2021-05-31
hCoV-19/Denmark/DCGC-110318/2021	EPI_ISL_3074150	EPI_SET_230103mu	Alpha	2021-05-31
hCoV-19/Denmark/DCGC-110319/2021	EPI_ISL_3074151	EPI_SET_230103mu	Alpha	2021-05-31
hCoV-19/Denmark/DCGC-110320/2021	EPI_ISL_2675558	EPI_SET_230103mu	Alpha	2021-05-31
hCoV-19/Denmark/DCGC-110323/2021	EPI_ISL_2675560	EPI_SET_230103mu	Alpha	2021-05-31
hCoV-19/Denmark/DCGC-110333/2021	EPI_ISL_3074153	EPI_SET_230103mu	Alpha	2021-06-07
hCoV-19/Denmark/DCGC-110347/2021	EPI_ISL_2675580	EPI_SET_230103mu	Alpha	2021-06-07
hCoV-19/Denmark/DCGC-110363/2021	EPI_ISL_2675587	EPI_SET_230103mu	Alpha	2021-06-07
hCoV-19/Denmark/DCGC-110364/2021	EPI_ISL_2675588	EPI_SET_230103mu	Alpha	2021-05-31
hCoV-19/Denmark/DCGC-110390/2021	EPI_ISL_2675608	EPI_SET_230103mu	Alpha	2021-06-07
hCoV-19/Denmark/DCGC-110391/2021	EPI_ISL_3074160	EPI_SET_230103mu	Alpha	2021-05-31
hCoV-19/Denmark/DCGC-110402/2021	EPI_ISL_2675614	EPI_SET_230103mu	Alpha	2021-06-07
hCoV-19/Denmark/DCGC-110405/2021	EPI_ISL_2675616	EPI_SET_230103mu	Alpha	2021-05-31
hCoV-19/Denmark/DCGC-110412/2021	EPI_ISL_2675622	EPI_SET_230103mu	Alpha	2021-06-07
hCoV-19/Denmark/DCGC-110417/2021	EPI_ISL_3074163	EPI_SET_230103mu	Alpha	2021-06-07
hCoV-19/Denmark/DCGC-110422/2021	EPI_ISL_2675629	EPI_SET_230103mu	Alpha	2021-05-31
hCoV-19/Denmark/DCGC-110427/2021	EPI_ISL_3074166	EPI_SET_230103mu	Alpha	2021-06-07
hCoV-19/Denmark/DCGC-110437/2021	EPI_ISL_2675640	EPI_SET_230103mu	Alpha	2021-06-07
hCoV-19/Denmark/DCGC-110439/2021	EPI_ISL_2675641	EPI_SET_230103mu	Alpha	2021-05-31
hCoV-19/Denmark/DCGC-110444/2021	EPI_ISL_2675646	EPI_SET_230103mu	Alpha	2021-05-31
hCoV-19/Denmark/DCGC-110452/2021	EPI_ISL_2675652	EPI_SET_230103mu	Alpha	2021-05-31
hCoV-19/Denmark/DCGC-110454/2021	EPI_ISL_2675654	EPI_SET_230103mu	Alpha	2021-05-31
hCoV-19/Denmark/DCGC-110458/2021	EPI_ISL_2675658	EPI_SET_230103mu	Alpha	2021-05-31
hCoV-19/Denmark/DCGC-110459/2021	EPI_ISL_2675659	EPI_SET_230103mu	Alpha	2021-05-31
hCoV-19/Denmark/DCGC-110462/2021	EPI_ISL_2675662	EPI_SET_230103mu	Alpha	2021-05-31
hCoV-19/Denmark/DCGC-110467/2021	EPI_ISL_2675667	EPI_SET_230103mu	Alpha	2021-06-07
hCoV-19/Denmark/DCGC-110487/2021	EPI_ISL_2675680	EPI_SET_230103mu	Alpha	2021-06-07
hCoV-19/Denmark/DCGC-110493/2021	EPI_ISL_2675686	EPI_SET_230103mu	Alpha	2021-05-31
hCoV-19/Denmark/DCGC-110494/2021	EPI_ISL_2675687	EPI_SET_230103mu	Alpha	2021-05-31
hCoV-19/Denmark/DCGC-110495/2021	EPI_ISL_2675688	EPI_SET_230103mu	Alpha	2021-06-07
hCoV-19/Denmark/DCGC-110503/2021	EPI_ISL_2675696	EPI_SET_230103mu	Alpha	2021-06-07
hCoV-19/Denmark/DCGC-110515/2021	EPI_ISL_2675706	EPI_SET_230103mu	Alpha	2021-05-31
hCoV-19/Denmark/DCGC-110518/2021	EPI_ISL_2675708	EPI_SET_230103mu	Alpha	2021-05-31
hCoV-19/Denmark/DCGC-110522/2021	EPI_ISL_3074172	EPI_SET_230103mu	Alpha	2021-06-07
hCoV-19/Denmark/DCGC-110523/2021	EPI_ISL_2675711	EPI_SET_230103mu	Alpha	2021-05-31
hCoV-19/Denmark/DCGC-110535/2021	EPI_ISL_2675719	EPI_SET_230103mu	Alpha	2021-06-07
hCoV-19/Denmark/DCGC-110540/2021	EPI_ISL_2675724	EPI_SET_230103mu	Alpha	2021-06-14
hCoV-19/Denmark/DCGC-110543/2021	EPI_ISL_2675727	EPI_SET_230103mu	Alpha	2021-05-31
hCoV-19/Denmark/DCGC-110550/2021	EPI_ISL_2675733	EPI_SET_230103mu	Alpha	2021-05-31
hCoV-19/Denmark/DCGC-110566/2021	EPI_ISL_2675743	EPI_SET_230103mu	Alpha	2021-05-31
hCoV-19/Denmark/DCGC-110571/2021	EPI_ISL_2675748	EPI_SET_230103mu	Alpha	2021-05-31
hCoV-19/Denmark/DCGC-110574/2021	EPI_ISL_3074180	EPI_SET_230103mu	Alpha	2021-06-07
hCoV-19/Denmark/DCGC-110581/2021	EPI_ISL_2675753	EPI_SET_230103mu	Alpha	2021-05-31
hCoV-19/Denmark/DCGC-110585/2021	EPI_ISL_2675756	EPI_SET_230103mu	Alpha	2021-05-31
hCoV-19/Denmark/DCGC-110588/2021	EPI_ISL_3074182	EPI_SET_230103mu	Alpha	2021-05-31
hCoV-19/Denmark/DCGC-110590/2021	EPI_ISL_2675760	EPI_SET_230103mu	Alpha	2021-06-07
hCoV-19/Denmark/DCGC-110593/2021	EPI_ISL_3074183	EPI_SET_230103mu	Alpha	2021-06-07
hCoV-19/Denmark/DCGC-110604/2021	EPI_ISL_2675772	EPI_SET_230103mu	Alpha	2021-06-07
hCoV-19/Denmark/DCGC-110608/2021	EPI_ISL_2675774	EPI_SET_230103mu	Alpha	2021-05-31
hCoV-19/Denmark/DCGC-110611/2021	EPI_ISL_2675777	EPI_SET_230103mu	Alpha	2021-05-31
hCoV-19/Denmark/DCGC-110612/2021	EPI_ISL_3074185	EPI_SET_230103mu	Alpha	2021-05-31
hCoV-19/Denmark/DCGC-110615/2021	EPI_ISL_2675780	EPI_SET_230103mu	Alpha	2021-05-31
hCoV-19/Denmark/DCGC-110617/2021	EPI_ISL_2675781	EPI_SET_230103mu	Alpha	2021-05-31
hCoV-19/Denmark/DCGC-110623/2021	EPI_ISL_2675787	EPI_SET_230103mu	Alpha	2021-05-31
hCoV-19/Denmark/DCGC-110632/2021	EPI_ISL_3074188	EPI_SET_230103mu	Alpha	2021-06-07
hCoV-19/Denmark/DCGC-110635/2021	EPI_ISL_3074189	EPI_SET_230103mu	Alpha	2021-06-07
hCoV-19/Denmark/DCGC-110641/2021	EPI_ISL_2675799	EPI_SET_230103mu	Alpha	2021-06-07
hCoV-19/Denmark/DCGC-110645/2021	EPI_ISL_2675803	EPI_SET_230103mu	Alpha	2021-05-31
hCoV-19/Denmark/DCGC-110663/2021	EPI_ISL_2675818	EPI_SET_230103mu	Alpha	2021-05-31
hCoV-19/Denmark/DCGC-110674/2021	EPI_ISL_2675826	EPI_SET_230103mu	Alpha	2021-05-31
hCoV-19/Denmark/DCGC-110679/2021	EPI_ISL_2675831	EPI_SET_230103mu	Alpha	2021-05-31
hCoV-19/Denmark/DCGC-110680/2021	EPI_ISL_2675832	EPI_SET_230103mu	Alpha	2021-05-31
hCoV-19/Denmark/DCGC-110691/2021	EPI_ISL_2675840	EPI_SET_230103mu	Alpha	2021-05-31
hCoV-19/Denmark/DCGC-110696/2021	EPI_ISL_3074195	EPI_SET_230103mu	Alpha	2021-05-31
hCoV-19/Denmark/DCGC-110699/2021	EPI_ISL_2675845	EPI_SET_230103mu	Alpha	2021-05-31
hCoV-19/Denmark/DCGC-110712/2021	EPI_ISL_2675853	EPI_SET_230103mu	Alpha	2021-05-31
hCoV-19/Denmark/DCGC-110726/2021	EPI_ISL_2675862	EPI_SET_230103mu	Alpha	2021-05-31
hCoV-19/Denmark/DCGC-110741/2021	EPI_ISL_2675874	EPI_SET_230103mu	Alpha	2021-05-31
hCoV-19/Denmark/DCGC-110742/2021	EPI_ISL_3074201	EPI_SET_230103mu	Alpha	2021-06-07
hCoV-19/Denmark/DCGC-110751/2021	EPI_ISL_2675877	EPI_SET_230103mu	Alpha	2021-05-31
hCoV-19/Denmark/DCGC-110767/2021	EPI_ISL_3074209	EPI_SET_230103mu	Alpha	2021-06-14
hCoV-19/Denmark/DCGC-110774/2021	EPI_ISL_3074211	EPI_SET_230103mu	Alpha	2021-06-07
hCoV-19/Denmark/DCGC-110775/2021	EPI_ISL_2675886	EPI_SET_230103mu	Alpha	2021-05-31
hCoV-19/Denmark/DCGC-110781/2021	EPI_ISL_2665411	EPI_SET_230103mu	Alpha	2021-06-07
hCoV-19/Denmark/DCGC-110782/2021	EPI_ISL_3074212	EPI_SET_230103mu	Alpha	2021-06-07
hCoV-19/Denmark/DCGC-110786/2021	EPI_ISL_2665414	EPI_SET_230103mu	Alpha	2021-05-31
hCoV-19/Denmark/DCGC-110788/2021	EPI_ISL_2665416	EPI_SET_230103mu	Alpha	2021-06-07
hCoV-19/Denmark/DCGC-110794/2021	EPI_ISL_2665421	EPI_SET_230103mu	Alpha	2021-06-07
hCoV-19/Denmark/DCGC-110795/2021	EPI_ISL_2665422	EPI_SET_230103mu	Alpha	2021-06-07
hCoV-19/Denmark/DCGC-110796/2021	EPI_ISL_2665423	EPI_SET_230103mu	Alpha	2021-05-31
hCoV-19/Denmark/DCGC-110797/2021	EPI_ISL_3074214	EPI_SET_230103mu	Alpha	2021-05-31
hCoV-19/Denmark/DCGC-110801/2021	EPI_ISL_3074216	EPI_SET_230103mu	Alpha	2021-05-31
hCoV-19/Denmark/DCGC-110813/2021	EPI_ISL_2665436	EPI_SET_230103mu	Alpha	2021-06-07
hCoV-19/Denmark/DCGC-110823/2021	EPI_ISL_2665443	EPI_SET_230103mu	Alpha	2021-06-07
hCoV-19/Denmark/DCGC-110830/2021	EPI_ISL_2665448	EPI_SET_230103mu	Alpha	2021-06-07
hCoV-19/Denmark/DCGC-110835/2021	EPI_ISL_2665453	EPI_SET_230103mu	Alpha	2021-06-07
hCoV-19/Denmark/DCGC-110837/2021	EPI_ISL_3074217	EPI_SET_230103mu	Alpha	2021-06-07
hCoV-19/Denmark/DCGC-110846/2021	EPI_ISL_2665459	EPI_SET_230103mu	Alpha	2021-05-31
hCoV-19/Denmark/DCGC-110847/2021	EPI_ISL_2665460	EPI_SET_230103mu	Alpha	2021-05-31
hCoV-19/Denmark/DCGC-110862/2021	EPI_ISL_3074219	EPI_SET_230103mu	Alpha	2021-05-31
hCoV-19/Denmark/DCGC-110864/2021	EPI_ISL_2665473	EPI_SET_230103mu	Alpha	2021-06-07
hCoV-19/Denmark/DCGC-110865/2021	EPI_ISL_2665474	EPI_SET_230103mu	Alpha	2021-05-31
hCoV-19/Denmark/DCGC-110868/2021	EPI_ISL_2665476	EPI_SET_230103mu	Alpha	2021-05-31
hCoV-19/Denmark/DCGC-110870/2021	EPI_ISL_2665477	EPI_SET_230103mu	Alpha	2021-05-31
hCoV-19/Denmark/DCGC-110872/2021	EPI_ISL_2665479	EPI_SET_230103mu	Alpha	2021-06-07
hCoV-19/Denmark/DCGC-110883/2021	EPI_ISL_2665486	EPI_SET_230103mu	Alpha	2021-05-31
hCoV-19/Denmark/DCGC-110887/2021	EPI_ISL_2665490	EPI_SET_230103mu	Alpha	2021-05-31
hCoV-19/Denmark/DCGC-110891/2021	EPI_ISL_2665491	EPI_SET_230103mu	Alpha	2021-06-07
hCoV-19/Denmark/DCGC-110896/2021	EPI_ISL_2665495	EPI_SET_230103mu	Alpha	2021-06-07
hCoV-19/Denmark/DCGC-110898/2021	EPI_ISL_2665497	EPI_SET_230103mu	Alpha	2021-05-31
hCoV-19/Denmark/DCGC-110899/2021	EPI_ISL_2665498	EPI_SET_230103mu	Alpha	2021-05-31
hCoV-19/Denmark/DCGC-110902/2021	EPI_ISL_2665501	EPI_SET_230103mu	Alpha	2021-05-24
hCoV-19/Denmark/DCGC-110903/2021	EPI_ISL_3074223	EPI_SET_230103mu	Alpha	2021-05-31
hCoV-19/Denmark/DCGC-110907/2021	EPI_ISL_2665504	EPI_SET_230103mu	Alpha	2021-05-31
hCoV-19/Denmark/DCGC-110911/2021	EPI_ISL_3074225	EPI_SET_230103mu	Alpha	2021-05-31
hCoV-19/Denmark/DCGC-110912/2021	EPI_ISL_2665508	EPI_SET_230103mu	Alpha	2021-06-14
hCoV-19/Denmark/DCGC-110939/2021	EPI_ISL_3074229	EPI_SET_230103mu	Alpha	2021-05-31
hCoV-19/Denmark/DCGC-110945/2021	EPI_ISL_3074230	EPI_SET_230103mu	Alpha	2021-05-31
hCoV-19/Denmark/DCGC-110948/2021	EPI_ISL_2665532	EPI_SET_230103mu	Alpha	2021-06-14
hCoV-19/Denmark/DCGC-110949/2021	EPI_ISL_2665533	EPI_SET_230103mu	Alpha	2021-06-07
hCoV-19/Denmark/DCGC-110952/2021	EPI_ISL_2665536	EPI_SET_230103mu	Alpha	2021-05-31
hCoV-19/Denmark/DCGC-110962/2021	EPI_ISL_2665543	EPI_SET_230103mu	Alpha	2021-05-31
hCoV-19/Denmark/DCGC-110964/2021	EPI_ISL_2665545	EPI_SET_230103mu	Alpha	2021-05-31
hCoV-19/Denmark/DCGC-110965/2021	EPI_ISL_2665546	EPI_SET_230103mu	Alpha	2021-05-31
hCoV-19/Denmark/DCGC-110966/2021	EPI_ISL_3074231	EPI_SET_230103mu	Alpha	2021-06-14
hCoV-19/Denmark/DCGC-110971/2021	EPI_ISL_3074232	EPI_SET_230103mu	Alpha	2021-05-31
hCoV-19/Denmark/DCGC-110984/2021	EPI_ISL_3074234	EPI_SET_230103mu	Alpha	2021-05-31
hCoV-19/Denmark/DCGC-110987/2021	EPI_ISL_2665561	EPI_SET_230103mu	Alpha	2021-05-31
hCoV-19/Denmark/DCGC-110988/2021	EPI_ISL_2665562	EPI_SET_230103mu	Alpha	2021-06-07
hCoV-19/Denmark/DCGC-110993/2021	EPI_ISL_3074235	EPI_SET_230103mu	Alpha	2021-05-31
hCoV-19/Denmark/DCGC-110995/2021	EPI_ISL_3074236	EPI_SET_230103mu	Alpha	2021-05-31
hCoV-19/Denmark/DCGC-110997/2021	EPI_ISL_2665568	EPI_SET_230103mu	Alpha	2021-05-31
hCoV-19/Denmark/DCGC-111002/2021	EPI_ISL_3074237	EPI_SET_230103mu	Alpha	2021-06-07
hCoV-19/Denmark/DCGC-111007/2021	EPI_ISL_3074239	EPI_SET_230103mu	Alpha	2021-05-31
hCoV-19/Denmark/DCGC-111018/2021	EPI_ISL_2665583	EPI_SET_230103mu	Alpha	2021-06-14
hCoV-19/Denmark/DCGC-111021/2021	EPI_ISL_2665585	EPI_SET_230103mu	Alpha	2021-05-31
hCoV-19/Denmark/DCGC-111025/2021	EPI_ISL_2665587	EPI_SET_230103mu	Alpha	2021-06-07
hCoV-19/Denmark/DCGC-111029/2021	EPI_ISL_3074241	EPI_SET_230103mu	Alpha	2021-06-14
hCoV-19/Denmark/DCGC-111030/2021	EPI_ISL_3074242	EPI_SET_230103mu	Alpha	2021-06-07
hCoV-19/Denmark/DCGC-111037/2021	EPI_ISL_2665595	EPI_SET_230103mu	Alpha	2021-05-31
hCoV-19/Denmark/DCGC-111049/2021	EPI_ISL_3074246	EPI_SET_230103mu	Alpha	2021-05-31
hCoV-19/Denmark/DCGC-111050/2021	EPI_ISL_2665604	EPI_SET_230103mu	Alpha	2021-05-31
hCoV-19/Denmark/DCGC-111051/2021	EPI_ISL_2665605	EPI_SET_230103mu	Alpha	2021-05-31
hCoV-19/Denmark/DCGC-111056/2021	EPI_ISL_3074248	EPI_SET_230103mu	Alpha	2021-05-31
hCoV-19/Denmark/DCGC-111057/2021	EPI_ISL_2665608	EPI_SET_230103mu	Alpha	2021-06-07
hCoV-19/Denmark/DCGC-111062/2021	EPI_ISL_3074250	EPI_SET_230103mu	Alpha	2021-06-07
hCoV-19/Denmark/DCGC-111073/2021	EPI_ISL_2665617	EPI_SET_230103mu	Alpha	2021-05-31
hCoV-19/Denmark/DCGC-111076/2021	EPI_ISL_2665620	EPI_SET_230103mu	Alpha	2021-06-07
hCoV-19/Denmark/DCGC-111079/2021	EPI_ISL_2665622	EPI_SET_230103mu	Alpha	2021-05-31
hCoV-19/Denmark/DCGC-111084/2021	EPI_ISL_2665626	EPI_SET_230103mu	Alpha	2021-06-07
hCoV-19/Denmark/DCGC-111088/2021	EPI_ISL_2665630	EPI_SET_230103mu	Alpha	2021-05-31
hCoV-19/Denmark/DCGC-111089/2021	EPI_ISL_3074252	EPI_SET_230103mu	Alpha	2021-05-31
hCoV-19/Denmark/DCGC-111108/2021	EPI_ISL_2665645	EPI_SET_230103mu	Alpha	2021-05-31
hCoV-19/Denmark/DCGC-111113/2021	EPI_ISL_3074253	EPI_SET_230103mu	Alpha	2021-05-31
hCoV-19/Denmark/DCGC-111128/2021	EPI_ISL_2665661	EPI_SET_230103mu	Alpha	2021-06-07
hCoV-19/Denmark/DCGC-111152/2021	EPI_ISL_2665678	EPI_SET_230103mu	Alpha	2021-05-31
hCoV-19/Denmark/DCGC-111158/2021	EPI_ISL_2665681	EPI_SET_230103mu	Alpha	2021-05-31
hCoV-19/Denmark/DCGC-111161/2021	EPI_ISL_2665683	EPI_SET_230103mu	Alpha	2021-05-31
hCoV-19/Denmark/DCGC-111175/2021	EPI_ISL_2665695	EPI_SET_230103mu	Alpha	2021-06-14
hCoV-19/Denmark/DCGC-111176/2021	EPI_ISL_3074260	EPI_SET_230103mu	Alpha	2021-05-31
hCoV-19/Denmark/DCGC-111179/2021	EPI_ISL_3074261	EPI_SET_230103mu	Alpha	2021-05-31
hCoV-19/Denmark/DCGC-111180/2021	EPI_ISL_2665698	EPI_SET_230103mu	Alpha	2021-05-31
hCoV-19/Denmark/DCGC-111182/2021	EPI_ISL_3074262	EPI_SET_230103mu	Alpha	2021-06-07
hCoV-19/Denmark/DCGC-111183/2021	EPI_ISL_3074263	EPI_SET_230103mu	Alpha	2021-05-31
hCoV-19/Denmark/DCGC-111194/2021	EPI_ISL_2665705	EPI_SET_230103mu	Alpha	2021-05-31
hCoV-19/Denmark/DCGC-111206/2021	EPI_ISL_2665714	EPI_SET_230103mu	Alpha	2021-05-31
hCoV-19/Denmark/DCGC-111218/2021	EPI_ISL_2665726	EPI_SET_230103mu	Alpha	2021-06-07
hCoV-19/Denmark/DCGC-111225/2021	EPI_ISL_2665732	EPI_SET_230103mu	Alpha	2021-05-31
hCoV-19/Denmark/DCGC-111242/2021	EPI_ISL_2665742	EPI_SET_230103mu	Alpha	2021-05-31
hCoV-19/Denmark/DCGC-111246/2021	EPI_ISL_2665745	EPI_SET_230103mu	Alpha	2021-06-07
hCoV-19/Denmark/DCGC-111248/2021	EPI_ISL_2665747	EPI_SET_230103mu	Alpha	2021-05-31
hCoV-19/Denmark/DCGC-111252/2021	EPI_ISL_2665751	EPI_SET_230103mu	Alpha	2021-05-31
hCoV-19/Denmark/DCGC-111259/2021	EPI_ISL_3074267	EPI_SET_230103mu	Alpha	2021-05-31
hCoV-19/Denmark/DCGC-111263/2021	EPI_ISL_2665759	EPI_SET_230103mu	Alpha	2021-05-31
hCoV-19/Denmark/DCGC-111266/2021	EPI_ISL_2665761	EPI_SET_230103mu	Alpha	2021-05-31
hCoV-19/Denmark/DCGC-111267/2021	EPI_ISL_2665762	EPI_SET_230103mu	Alpha	2021-06-07
hCoV-19/Denmark/DCGC-111268/2021	EPI_ISL_2665763	EPI_SET_230103mu	Alpha	2021-05-31
hCoV-19/Denmark/DCGC-111271/2021	EPI_ISL_2665766	EPI_SET_230103mu	Alpha	2021-05-31
hCoV-19/Denmark/DCGC-111282/2021	EPI_ISL_3074270	EPI_SET_230103mu	Alpha	2021-05-31
hCoV-19/Denmark/DCGC-111284/2021	EPI_ISL_2665774	EPI_SET_230103mu	Alpha	2021-06-14
hCoV-19/Denmark/DCGC-111301/2021	EPI_ISL_2665785	EPI_SET_230103mu	Alpha	2021-05-31
hCoV-19/Denmark/DCGC-111303/2021	EPI_ISL_2665787	EPI_SET_230103mu	Alpha	2021-06-07
hCoV-19/Denmark/DCGC-111304/2021	EPI_ISL_2665788	EPI_SET_230103mu	Alpha	2021-06-07
hCoV-19/Denmark/DCGC-111312/2021	EPI_ISL_2665795	EPI_SET_230103mu	Alpha	2021-05-31
hCoV-19/Denmark/DCGC-111314/2021	EPI_ISL_3074275	EPI_SET_230103mu	Alpha	2021-05-31
hCoV-19/Denmark/DCGC-111315/2021	EPI_ISL_2665796	EPI_SET_230103mu	Alpha	2021-06-07
hCoV-19/Denmark/DCGC-111318/2021	EPI_ISL_2665798	EPI_SET_230103mu	Alpha	2021-05-31
hCoV-19/Denmark/DCGC-111330/2021	EPI_ISL_2665806	EPI_SET_230103mu	Alpha	2021-05-31
hCoV-19/Denmark/DCGC-111332/2021	EPI_ISL_2665807	EPI_SET_230103mu	Alpha	2021-06-07
hCoV-19/Denmark/DCGC-111334/2021	EPI_ISL_2665808	EPI_SET_230103mu	Alpha	2021-05-31
hCoV-19/Denmark/DCGC-111337/2021	EPI_ISL_3074278	EPI_SET_230103mu	Alpha	2021-05-31
hCoV-19/Denmark/DCGC-111343/2021	EPI_ISL_2665814	EPI_SET_230103mu	Alpha	2021-06-07
hCoV-19/Denmark/DCGC-111346/2021	EPI_ISL_2665817	EPI_SET_230103mu	Alpha	2021-05-31
hCoV-19/Denmark/DCGC-111348/2021	EPI_ISL_2665818	EPI_SET_230103mu	Alpha	2021-05-31
hCoV-19/Denmark/DCGC-111349/2021	EPI_ISL_2665819	EPI_SET_230103mu	Alpha	2021-06-14
hCoV-19/Denmark/DCGC-111354/2021	EPI_ISL_2665824	EPI_SET_230103mu	Alpha	2021-05-31
hCoV-19/Denmark/DCGC-111357/2021	EPI_ISL_2665826	EPI_SET_230103mu	Alpha	2021-06-07
hCoV-19/Denmark/DCGC-111360/2021	EPI_ISL_2665828	EPI_SET_230103mu	Alpha	2021-05-31
hCoV-19/Denmark/DCGC-111362/2021	EPI_ISL_2665830	EPI_SET_230103mu	Alpha	2021-06-07
hCoV-19/Denmark/DCGC-111368/2021	EPI_ISL_2665835	EPI_SET_230103mu	Alpha	2021-05-31
hCoV-19/Denmark/DCGC-111370/2021	EPI_ISL_3074281	EPI_SET_230103mu	Alpha	2021-06-07
hCoV-19/Denmark/DCGC-111381/2021	EPI_ISL_2665843	EPI_SET_230103mu	Alpha	2021-05-31
hCoV-19/Denmark/DCGC-111406/2021	EPI_ISL_2665863	EPI_SET_230103mu	Alpha	2021-05-31
hCoV-19/Denmark/DCGC-111429/2021	EPI_ISL_2665883	EPI_SET_230103mu	Alpha	2021-05-31
hCoV-19/Denmark/DCGC-111432/2021	EPI_ISL_2665885	EPI_SET_230103mu	Alpha	2021-06-07
hCoV-19/Denmark/DCGC-111434/2021	EPI_ISL_2665887	EPI_SET_230103mu	Alpha	2021-05-31
hCoV-19/Denmark/DCGC-111438/2021	EPI_ISL_3074289	EPI_SET_230103mu	Alpha	2021-06-07
hCoV-19/Denmark/DCGC-111446/2021	EPI_ISL_2665893	EPI_SET_230103mu	Alpha	2021-06-07
hCoV-19/Denmark/DCGC-111454/2021	EPI_ISL_2665899	EPI_SET_230103mu	Alpha	2021-06-07
hCoV-19/Denmark/DCGC-111458/2021	EPI_ISL_2665903	EPI_SET_230103mu	Alpha	2021-05-24
hCoV-19/Denmark/DCGC-111459/2021	EPI_ISL_2665904	EPI_SET_230103mu	Alpha	2021-06-07
hCoV-19/Denmark/DCGC-111475/2021	EPI_ISL_2665918	EPI_SET_230103mu	Alpha	2021-05-31
hCoV-19/Denmark/DCGC-111476/2021	EPI_ISL_3074292	EPI_SET_230103mu	Alpha	2021-05-31
hCoV-19/Denmark/DCGC-111479/2021	EPI_ISL_2665921	EPI_SET_230103mu	Alpha	2021-05-31
hCoV-19/Denmark/DCGC-111483/2021	EPI_ISL_2665925	EPI_SET_230103mu	Alpha	2021-05-31
hCoV-19/Denmark/DCGC-111484/2021	EPI_ISL_2665926	EPI_SET_230103mu	Alpha	2021-05-31
hCoV-19/Denmark/DCGC-111485/2021	EPI_ISL_2665927	EPI_SET_230103mu	Alpha	2021-06-07
hCoV-19/Denmark/DCGC-111486/2021	EPI_ISL_2665928	EPI_SET_230103mu	Alpha	2021-05-31
hCoV-19/Denmark/DCGC-111489/2021	EPI_ISL_3074294	EPI_SET_230103mu	Alpha	2021-05-31
hCoV-19/Denmark/DCGC-111491/2021	EPI_ISL_2665931	EPI_SET_230103mu	Alpha	2021-06-07
hCoV-19/Denmark/DCGC-111501/2021	EPI_ISL_2665940	EPI_SET_230103mu	Alpha	2021-05-31
hCoV-19/Denmark/DCGC-111510/2021	EPI_ISL_2665949	EPI_SET_230103mu	Alpha	2021-05-31
hCoV-19/Denmark/DCGC-111511/2021	EPI_ISL_2665950	EPI_SET_230103mu	Alpha	2021-06-07
hCoV-19/Denmark/DCGC-111519/2021	EPI_ISL_2665958	EPI_SET_230103mu	Alpha	2021-05-31
hCoV-19/Denmark/DCGC-111521/2021	EPI_ISL_2665960	EPI_SET_230103mu	Alpha	2021-05-31
hCoV-19/Denmark/DCGC-111525/2021	EPI_ISL_2665964	EPI_SET_230103mu	Alpha	2021-05-31
hCoV-19/Denmark/DCGC-111530/2021	EPI_ISL_3074295	EPI_SET_230103mu	Alpha	2021-05-31
hCoV-19/Denmark/DCGC-111531/2021	EPI_ISL_2665969	EPI_SET_230103mu	Alpha	2021-05-31
hCoV-19/Denmark/DCGC-111532/2021	EPI_ISL_2665970	EPI_SET_230103mu	Alpha	2021-06-07
hCoV-19/Denmark/DCGC-111534/2021	EPI_ISL_2665972	EPI_SET_230103mu	Alpha	2021-06-07
hCoV-19/Denmark/DCGC-111536/2021	EPI_ISL_2665974	EPI_SET_230103mu	Alpha	2021-05-31
hCoV-19/Denmark/DCGC-111540/2021	EPI_ISL_3074296	EPI_SET_230103mu	Alpha	2021-05-31
hCoV-19/Denmark/DCGC-111543/2021	EPI_ISL_2665979	EPI_SET_230103mu	Alpha	2021-05-31
hCoV-19/Denmark/DCGC-111558/2021	EPI_ISL_2665989	EPI_SET_230103mu	Alpha	2021-05-31
hCoV-19/Denmark/DCGC-111562/2021	EPI_ISL_3074300	EPI_SET_230103mu	Alpha	2021-05-31
hCoV-19/Denmark/DCGC-111573/2021	EPI_ISL_2665999	EPI_SET_230103mu	Alpha	2021-05-31
hCoV-19/Denmark/DCGC-111583/2021	EPI_ISL_2666009	EPI_SET_230103mu	Alpha	2021-05-31
hCoV-19/Denmark/DCGC-111589/2021	EPI_ISL_2666015	EPI_SET_230103mu	Alpha	2021-05-31
hCoV-19/Denmark/DCGC-111591/2021	EPI_ISL_2666017	EPI_SET_230103mu	Alpha	2021-05-31
hCoV-19/Denmark/DCGC-111595/2021	EPI_ISL_3074304	EPI_SET_230103mu	Alpha	2021-05-31
hCoV-19/Denmark/DCGC-111596/2021	EPI_ISL_3074305	EPI_SET_230103mu	Alpha	2021-05-31
hCoV-19/Denmark/DCGC-111598/2021	EPI_ISL_2666021	EPI_SET_230103mu	Alpha	2021-05-31
hCoV-19/Denmark/DCGC-111602/2021	EPI_ISL_2666024	EPI_SET_230103mu	Alpha	2021-05-31
hCoV-19/Denmark/DCGC-111603/2021	EPI_ISL_2666025	EPI_SET_230103mu	Alpha	2021-05-31
hCoV-19/Denmark/DCGC-111606/2021	EPI_ISL_2666028	EPI_SET_230103mu	Alpha	2021-05-31
hCoV-19/Denmark/DCGC-111612/2021	EPI_ISL_2666032	EPI_SET_230103mu	Alpha	2021-06-07
hCoV-19/Denmark/DCGC-111617/2021	EPI_ISL_2666037	EPI_SET_230103mu	Alpha	2021-06-07
hCoV-19/Denmark/DCGC-111627/2021	EPI_ISL_2666046	EPI_SET_230103mu	Alpha	2021-06-14
hCoV-19/Denmark/DCGC-111629/2021	EPI_ISL_2666047	EPI_SET_230103mu	Alpha	2021-06-14
hCoV-19/Denmark/DCGC-111637/2021	EPI_ISL_3074308	EPI_SET_230103mu	Alpha	2021-05-31
hCoV-19/Denmark/DCGC-111643/2021	EPI_ISL_2666057	EPI_SET_230103mu	Alpha	2021-06-07
hCoV-19/Denmark/DCGC-111644/2021	EPI_ISL_3074309	EPI_SET_230103mu	Alpha	2021-05-31
hCoV-19/Denmark/DCGC-111664/2021	EPI_ISL_2666075	EPI_SET_230103mu	Alpha	2021-06-07
hCoV-19/Denmark/DCGC-111671/2021	EPI_ISL_2666082	EPI_SET_230103mu	Alpha	2021-05-31
hCoV-19/Denmark/DCGC-111681/2021	EPI_ISL_2666091	EPI_SET_230103mu	Alpha	2021-05-31
hCoV-19/Denmark/DCGC-111686/2021	EPI_ISL_2666095	EPI_SET_230103mu	Alpha	2021-05-31
hCoV-19/Denmark/DCGC-111692/2021	EPI_ISL_2666098	EPI_SET_230103mu	Alpha	2021-06-07
hCoV-19/Denmark/DCGC-111707/2021	EPI_ISL_3074313	EPI_SET_230103mu	Alpha	2021-05-31
hCoV-19/Denmark/DCGC-111712/2021	EPI_ISL_3074314	EPI_SET_230103mu	Alpha	2021-05-31
hCoV-19/Denmark/DCGC-111715/2021	EPI_ISL_2666112	EPI_SET_230103mu	Alpha	2021-06-07
hCoV-19/Denmark/DCGC-111722/2021	EPI_ISL_2666118	EPI_SET_230103mu	Alpha	2021-06-07
hCoV-19/Denmark/DCGC-111726/2021	EPI_ISL_2666119	EPI_SET_230103mu	Alpha	2021-05-31
hCoV-19/Denmark/DCGC-111731/2021	EPI_ISL_2666124	EPI_SET_230103mu	Alpha	2021-05-31
hCoV-19/Denmark/DCGC-111734/2021	EPI_ISL_2666126	EPI_SET_230103mu	Alpha	2021-05-31
hCoV-19/Denmark/DCGC-111742/2021	EPI_ISL_3074316	EPI_SET_230103mu	Alpha	2021-06-07
hCoV-19/Denmark/DCGC-111747/2021	EPI_ISL_2666138	EPI_SET_230103mu	Alpha	2021-05-31
hCoV-19/Denmark/DCGC-111749/2021	EPI_ISL_2666140	EPI_SET_230103mu	Alpha	2021-06-14
hCoV-19/Denmark/DCGC-111750/2021	EPI_ISL_2666141	EPI_SET_230103mu	Alpha	2021-05-31
hCoV-19/Denmark/DCGC-111752/2021	EPI_ISL_2666143	EPI_SET_230103mu	Alpha	2021-05-31
hCoV-19/Denmark/DCGC-111761/2021	EPI_ISL_2666149	EPI_SET_230103mu	Alpha	2021-05-31
hCoV-19/Denmark/DCGC-111763/2021	EPI_ISL_2666151	EPI_SET_230103mu	Alpha	2021-05-31
hCoV-19/Denmark/DCGC-111773/2021	EPI_ISL_2666160	EPI_SET_230103mu	Alpha	2021-06-07
hCoV-19/Denmark/DCGC-111787/2021	EPI_ISL_3074319	EPI_SET_230103mu	Alpha	2021-05-31
hCoV-19/Denmark/DCGC-111790/2021	EPI_ISL_2666173	EPI_SET_230103mu	Alpha	2021-05-31
hCoV-19/Denmark/DCGC-111792/2021	EPI_ISL_2666175	EPI_SET_230103mu	Alpha	2021-05-31
hCoV-19/Denmark/DCGC-111799/2021	EPI_ISL_2666180	EPI_SET_230103mu	Alpha	2021-06-07
hCoV-19/Denmark/DCGC-111809/2021	EPI_ISL_2666186	EPI_SET_230103mu	Alpha	2021-05-31
hCoV-19/Denmark/DCGC-111817/2021	EPI_ISL_2666189	EPI_SET_230103mu	Alpha	2021-05-31
hCoV-19/Denmark/DCGC-111819/2021	EPI_ISL_3074325	EPI_SET_230103mu	Alpha	2021-06-07
hCoV-19/Denmark/DCGC-111821/2021	EPI_ISL_2666192	EPI_SET_230103mu	Alpha	2021-05-31
hCoV-19/Denmark/DCGC-111823/2021	EPI_ISL_2666194	EPI_SET_230103mu	Alpha	2021-06-07
hCoV-19/Denmark/DCGC-111835/2021	EPI_ISL_2666203	EPI_SET_230103mu	Alpha	2021-05-31
hCoV-19/Denmark/DCGC-111843/2021	EPI_ISL_2666208	EPI_SET_230103mu	Alpha	2021-05-31
hCoV-19/Denmark/DCGC-111858/2021	EPI_ISL_2666221	EPI_SET_230103mu	Alpha	2021-06-07
hCoV-19/Denmark/DCGC-111860/2021	EPI_ISL_2666223	EPI_SET_230103mu	Alpha	2021-05-31
hCoV-19/Denmark/DCGC-111866/2021	EPI_ISL_2666229	EPI_SET_230103mu	Alpha	2021-05-31
hCoV-19/Denmark/DCGC-111871/2021	EPI_ISL_2666233	EPI_SET_230103mu	Alpha	2021-06-07
hCoV-19/Denmark/DCGC-111873/2021	EPI_ISL_3074329	EPI_SET_230103mu	Alpha	2021-05-31
hCoV-19/Denmark/DCGC-111878/2021	EPI_ISL_2666238	EPI_SET_230103mu	Alpha	2021-06-07
hCoV-19/Denmark/DCGC-111886/2021	EPI_ISL_3074330	EPI_SET_230103mu	Alpha	2021-05-31
hCoV-19/Denmark/DCGC-111900/2021	EPI_ISL_2666253	EPI_SET_230103mu	Alpha	2021-05-31
hCoV-19/Denmark/DCGC-111902/2021	EPI_ISL_2666255	EPI_SET_230103mu	Alpha	2021-06-07
hCoV-19/Denmark/DCGC-111917/2021	EPI_ISL_2666265	EPI_SET_230103mu	Alpha	2021-05-31
hCoV-19/Denmark/DCGC-111918/2021	EPI_ISL_2666266	EPI_SET_230103mu	Alpha	2021-05-31
hCoV-19/Denmark/DCGC-111924/2021	EPI_ISL_3074335	EPI_SET_230103mu	Alpha	2021-06-14
hCoV-19/Denmark/DCGC-111927/2021	EPI_ISL_3074336	EPI_SET_230103mu	Alpha	2021-05-31
hCoV-19/Denmark/DCGC-111929/2021	EPI_ISL_2666273	EPI_SET_230103mu	Alpha	2021-06-07
hCoV-19/Denmark/DCGC-111933/2021	EPI_ISL_2666276	EPI_SET_230103mu	Alpha	2021-06-14
hCoV-19/Denmark/DCGC-111938/2021	EPI_ISL_2666278	EPI_SET_230103mu	Alpha	2021-05-31
hCoV-19/Denmark/DCGC-111939/2021	EPI_ISL_2666279	EPI_SET_230103mu	Alpha	2021-05-31
hCoV-19/Denmark/DCGC-111946/2021	EPI_ISL_3074340	EPI_SET_230103mu	Alpha	2021-06-07
hCoV-19/Denmark/DCGC-111964/2021	EPI_ISL_2666300	EPI_SET_230103mu	Alpha	2021-05-31
hCoV-19/Denmark/DCGC-111967/2021	EPI_ISL_3074342	EPI_SET_230103mu	Alpha	2021-05-31
hCoV-19/Denmark/DCGC-111973/2021	EPI_ISL_3074345	EPI_SET_230103mu	Alpha	2021-05-31
hCoV-19/Denmark/DCGC-111992/2021	EPI_ISL_2666317	EPI_SET_230103mu	Alpha	2021-05-31
hCoV-19/Denmark/DCGC-111993/2021	EPI_ISL_2666318	EPI_SET_230103mu	Alpha	2021-05-31
hCoV-19/Denmark/DCGC-111995/2021	EPI_ISL_3074346	EPI_SET_230103mu	Alpha	2021-06-07
hCoV-19/Denmark/DCGC-111999/2021	EPI_ISL_2666321	EPI_SET_230103mu	Alpha	2021-05-31
hCoV-19/Denmark/DCGC-112000/2021	EPI_ISL_3074348	EPI_SET_230103mu	Alpha	2021-06-07
hCoV-19/Denmark/DCGC-112003/2021	EPI_ISL_2666324	EPI_SET_230103mu	Alpha	2021-05-31
hCoV-19/Denmark/DCGC-112006/2021	EPI_ISL_2666326	EPI_SET_230103mu	Alpha	2021-05-24
hCoV-19/Denmark/DCGC-112007/2021	EPI_ISL_2666327	EPI_SET_230103mu	Alpha	2021-06-14
hCoV-19/Denmark/DCGC-112014/2021	EPI_ISL_2666332	EPI_SET_230103mu	Alpha	2021-05-31
hCoV-19/Denmark/DCGC-112020/2021	EPI_ISL_2666335	EPI_SET_230103mu	Alpha	2021-05-31
hCoV-19/Denmark/DCGC-112024/2021	EPI_ISL_3074352	EPI_SET_230103mu	Alpha	2021-05-31
hCoV-19/Denmark/DCGC-112026/2021	EPI_ISL_2666338	EPI_SET_230103mu	Alpha	2021-05-31
hCoV-19/Denmark/DCGC-112027/2021	EPI_ISL_2666339	EPI_SET_230103mu	Alpha	2021-05-31
hCoV-19/Denmark/DCGC-112029/2021	EPI_ISL_2666341	EPI_SET_230103mu	Alpha	2021-05-31
hCoV-19/Denmark/DCGC-112033/2021	EPI_ISL_3074354	EPI_SET_230103mu	Alpha	2021-05-31
hCoV-19/Denmark/DCGC-112044/2021	EPI_ISL_2666352	EPI_SET_230103mu	Alpha	2021-05-31
hCoV-19/Denmark/DCGC-112047/2021	EPI_ISL_2666354	EPI_SET_230103mu	Alpha	2021-05-31
hCoV-19/Denmark/DCGC-112052/2021	EPI_ISL_2666357	EPI_SET_230103mu	Alpha	2021-06-07
hCoV-19/Denmark/DCGC-112060/2021	EPI_ISL_2666360	EPI_SET_230103mu	Alpha	2021-05-31
hCoV-19/Denmark/DCGC-112063/2021	EPI_ISL_3074360	EPI_SET_230103mu	Alpha	2021-05-31
hCoV-19/Denmark/DCGC-112065/2021	EPI_ISL_2666362	EPI_SET_230103mu	Alpha	2021-05-31
hCoV-19/Denmark/DCGC-112069/2021	EPI_ISL_2666366	EPI_SET_230103mu	Alpha	2021-06-07
hCoV-19/Denmark/DCGC-112070/2021	EPI_ISL_2666367	EPI_SET_230103mu	Alpha	2021-05-31
hCoV-19/Denmark/DCGC-112075/2021	EPI_ISL_2666372	EPI_SET_230103mu	Alpha	2021-05-31
hCoV-19/Denmark/DCGC-112079/2021	EPI_ISL_2666376	EPI_SET_230103mu	Alpha	2021-05-31
hCoV-19/Denmark/DCGC-112091/2021	EPI_ISL_2666382	EPI_SET_230103mu	Alpha	2021-05-31
hCoV-19/Denmark/DCGC-112092/2021	EPI_ISL_2666383	EPI_SET_230103mu	Alpha	2021-06-07
hCoV-19/Denmark/DCGC-112095/2021	EPI_ISL_2666384	EPI_SET_230103zt	Delta	2021-06-14
hCoV-19/Denmark/DCGC-112097/2021	EPI_ISL_2666385	EPI_SET_230103mu	Alpha	2021-06-07
hCoV-19/Denmark/DCGC-112117/2021	EPI_ISL_2666402	EPI_SET_230103mu	Alpha	2021-06-07
hCoV-19/Denmark/DCGC-112119/2021	EPI_ISL_3074363	EPI_SET_230103mu	Alpha	2021-06-07
hCoV-19/Denmark/DCGC-112137/2021	EPI_ISL_3074368	EPI_SET_230103mu	Alpha	2021-05-31
hCoV-19/Denmark/DCGC-112145/2021	EPI_ISL_2666420	EPI_SET_230103mu	Alpha	2021-05-31
hCoV-19/Denmark/DCGC-112147/2021	EPI_ISL_2666422	EPI_SET_230103mu	Alpha	2021-06-07
hCoV-19/Denmark/DCGC-112150/2021	EPI_ISL_2666425	EPI_SET_230103mu	Alpha	2021-06-07
hCoV-19/Denmark/DCGC-112151/2021	EPI_ISL_2666426	EPI_SET_230103mu	Alpha	2021-05-31
hCoV-19/Denmark/DCGC-112160/2021	EPI_ISL_3074370	EPI_SET_230103mu	Alpha	2021-06-07
hCoV-19/Denmark/DCGC-112161/2021	EPI_ISL_3074371	EPI_SET_230103mu	Alpha	2021-06-07
hCoV-19/Denmark/DCGC-112162/2021	EPI_ISL_2666433	EPI_SET_230103mu	Alpha	2021-05-31
hCoV-19/Denmark/DCGC-112168/2021	EPI_ISL_2666439	EPI_SET_230103mu	Alpha	2021-06-07
hCoV-19/Denmark/DCGC-112172/2021	EPI_ISL_2666441	EPI_SET_230103mu	Alpha	2021-06-07
hCoV-19/Denmark/DCGC-112176/2021	EPI_ISL_2666445	EPI_SET_230103mu	Alpha	2021-06-07
hCoV-19/Denmark/DCGC-112177/2021	EPI_ISL_2666446	EPI_SET_230103mu	Alpha	2021-05-31
hCoV-19/Denmark/DCGC-112192/2021	EPI_ISL_2666458	EPI_SET_230103mu	Alpha	2021-05-31
hCoV-19/Denmark/DCGC-112193/2021	EPI_ISL_2666459	EPI_SET_230103mu	Alpha	2021-06-07
hCoV-19/Denmark/DCGC-112202/2021	EPI_ISL_3074375	EPI_SET_230103mu	Alpha	2021-05-31
hCoV-19/Denmark/DCGC-112205/2021	EPI_ISL_2666467	EPI_SET_230103mu	Alpha	2021-05-31
hCoV-19/Denmark/DCGC-112209/2021	EPI_ISL_2666470	EPI_SET_230103mu	Alpha	2021-05-31
hCoV-19/Denmark/DCGC-112214/2021	EPI_ISL_2666474	EPI_SET_230103mu	Alpha	2021-05-31
hCoV-19/Denmark/DCGC-112234/2021	EPI_ISL_2666487	EPI_SET_230103mu	Alpha	2021-06-07
hCoV-19/Denmark/DCGC-112236/2021	EPI_ISL_3074380	EPI_SET_230103mu	Alpha	2021-06-07
hCoV-19/Denmark/DCGC-112248/2021	EPI_ISL_2666496	EPI_SET_230103mu	Alpha	2021-05-31
hCoV-19/Denmark/DCGC-112252/2021	EPI_ISL_2666499	EPI_SET_230103mu	Alpha	2021-05-31
hCoV-19/Denmark/DCGC-112254/2021	EPI_ISL_2666501	EPI_SET_230103mu	Alpha	2021-05-31
hCoV-19/Denmark/DCGC-112255/2021	EPI_ISL_2666502	EPI_SET_230103mu	Alpha	2021-05-31
hCoV-19/Denmark/DCGC-112256/2021	EPI_ISL_3074384	EPI_SET_230103mu	Alpha	2021-05-31
hCoV-19/Denmark/DCGC-112260/2021	EPI_ISL_2666506	EPI_SET_230103mu	Alpha	2021-05-24
hCoV-19/Denmark/DCGC-112262/2021	EPI_ISL_2666507	EPI_SET_230103mu	Alpha	2021-05-31
hCoV-19/Denmark/DCGC-112301/2021	EPI_ISL_2666534	EPI_SET_230103mu	Alpha	2021-05-31
hCoV-19/Denmark/DCGC-112303/2021	EPI_ISL_2666536	EPI_SET_230103mu	Alpha	2021-06-07
hCoV-19/Denmark/DCGC-112304/2021	EPI_ISL_2666537	EPI_SET_230103mu	Alpha	2021-05-31
hCoV-19/Denmark/DCGC-112306/2021	EPI_ISL_3074392	EPI_SET_230103mu	Alpha	2021-05-31
hCoV-19/Denmark/DCGC-112315/2021	EPI_ISL_2666547	EPI_SET_230103mu	Alpha	2021-05-31
hCoV-19/Denmark/DCGC-112321/2021	EPI_ISL_2666551	EPI_SET_230103mu	Alpha	2021-05-31
hCoV-19/Denmark/DCGC-112322/2021	EPI_ISL_2666552	EPI_SET_230103mu	Alpha	2021-05-31
hCoV-19/Denmark/DCGC-112327/2021	EPI_ISL_3074394	EPI_SET_230103mu	Alpha	2021-05-31
hCoV-19/Denmark/DCGC-112336/2021	EPI_ISL_2666560	EPI_SET_230103mu	Alpha	2021-05-31
hCoV-19/Denmark/DCGC-112349/2021	EPI_ISL_2666568	EPI_SET_230103mu	Alpha	2021-06-07
hCoV-19/Denmark/DCGC-112356/2021	EPI_ISL_2666573	EPI_SET_230103mu	Alpha	2021-05-31
hCoV-19/Denmark/DCGC-112359/2021	EPI_ISL_2666576	EPI_SET_230103mu	Alpha	2021-05-31
hCoV-19/Denmark/DCGC-112369/2021	EPI_ISL_3074402	EPI_SET_230103mu	Alpha	2021-05-31
hCoV-19/Denmark/DCGC-112371/2021	EPI_ISL_3074403	EPI_SET_230103mu	Alpha	2021-06-07
hCoV-19/Denmark/DCGC-112372/2021	EPI_ISL_2666586	EPI_SET_230103mu	Alpha	2021-05-31
hCoV-19/Denmark/DCGC-112373/2021	EPI_ISL_3074404	EPI_SET_230103mu	Alpha	2021-06-07
hCoV-19/Denmark/DCGC-112379/2021	EPI_ISL_2666590	EPI_SET_230103mu	Alpha	2021-06-07
hCoV-19/Denmark/DCGC-112384/2021	EPI_ISL_3074405	EPI_SET_230103mu	Alpha	2021-05-31
hCoV-19/Denmark/DCGC-112387/2021	EPI_ISL_3074406	EPI_SET_230103mu	Alpha	2021-05-31
hCoV-19/Denmark/DCGC-112388/2021	EPI_ISL_2666596	EPI_SET_230103mu	Alpha	2021-06-07
hCoV-19/Denmark/DCGC-112393/2021	EPI_ISL_2666600	EPI_SET_230103mu	Alpha	2021-05-31
hCoV-19/Denmark/DCGC-112395/2021	EPI_ISL_3074408	EPI_SET_230103mu	Alpha	2021-06-07
hCoV-19/Denmark/DCGC-112397/2021	EPI_ISL_2666603	EPI_SET_230103mu	Alpha	2021-06-07
hCoV-19/Denmark/DCGC-112399/2021	EPI_ISL_2666605	EPI_SET_230103mu	Alpha	2021-05-31
hCoV-19/Denmark/DCGC-112406/2021	EPI_ISL_2666609	EPI_SET_230103mu	Alpha	2021-05-31
hCoV-19/Denmark/DCGC-112416/2021	EPI_ISL_2666617	EPI_SET_230103mu	Alpha	2021-05-31
hCoV-19/Denmark/DCGC-112420/2021	EPI_ISL_2666620	EPI_SET_230103mu	Alpha	2021-05-31
hCoV-19/Denmark/DCGC-112421/2021	EPI_ISL_2666621	EPI_SET_230103mu	Alpha	2021-06-14
hCoV-19/Denmark/DCGC-112426/2021	EPI_ISL_3074414	EPI_SET_230103mu	Alpha	2021-06-07
hCoV-19/Denmark/DCGC-112437/2021	EPI_ISL_2666633	EPI_SET_230103mu	Alpha	2021-05-31
hCoV-19/Denmark/DCGC-112439/2021	EPI_ISL_3074416	EPI_SET_230103mu	Alpha	2021-05-24
hCoV-19/Denmark/DCGC-112451/2021	EPI_ISL_2666643	EPI_SET_230103mu	Alpha	2021-05-31
hCoV-19/Denmark/DCGC-112472/2021	EPI_ISL_2666657	EPI_SET_230103mu	Alpha	2021-05-31
hCoV-19/Denmark/DCGC-112476/2021	EPI_ISL_2666660	EPI_SET_230103mu	Alpha	2021-05-31
hCoV-19/Denmark/DCGC-112482/2021	EPI_ISL_3074419	EPI_SET_230103mu	Alpha	2021-06-07
hCoV-19/Denmark/DCGC-112484/2021	EPI_ISL_2666664	EPI_SET_230103mu	Alpha	2021-05-31
hCoV-19/Denmark/DCGC-112485/2021	EPI_ISL_2666665	EPI_SET_230103mu	Alpha	2021-05-31
hCoV-19/Denmark/DCGC-112487/2021	EPI_ISL_2666667	EPI_SET_230103mu	Alpha	2021-05-31
hCoV-19/Denmark/DCGC-112494/2021	EPI_ISL_2666672	EPI_SET_230103mu	Alpha	2021-05-31
hCoV-19/Denmark/DCGC-112499/2021	EPI_ISL_2666677	EPI_SET_230103mu	Alpha	2021-05-31
hCoV-19/Denmark/DCGC-112500/2021	EPI_ISL_3074421	EPI_SET_230103mu	Alpha	2021-06-07
hCoV-19/Denmark/DCGC-112501/2021	EPI_ISL_3074422	EPI_SET_230103mu	Alpha	2021-05-31
hCoV-19/Denmark/DCGC-112509/2021	EPI_ISL_2666684	EPI_SET_230103mu	Alpha	2021-05-31
hCoV-19/Denmark/DCGC-112512/2021	EPI_ISL_2666686	EPI_SET_230103mu	Alpha	2021-05-31
hCoV-19/Denmark/DCGC-112523/2021	EPI_ISL_2666697	EPI_SET_230103mu	Alpha	2021-06-07
hCoV-19/Denmark/DCGC-112524/2021	EPI_ISL_2666698	EPI_SET_230103mu	Alpha	2021-05-31
hCoV-19/Denmark/DCGC-112531/2021	EPI_ISL_2666704	EPI_SET_230103mu	Alpha	2021-05-31
hCoV-19/Denmark/DCGC-112533/2021	EPI_ISL_2666705	EPI_SET_230103mu	Alpha	2021-05-31
hCoV-19/Denmark/DCGC-112534/2021	EPI_ISL_2666706	EPI_SET_230103mu	Alpha	2021-05-31
hCoV-19/Denmark/DCGC-112536/2021	EPI_ISL_2666708	EPI_SET_230103mu	Alpha	2021-06-07
hCoV-19/Denmark/DCGC-112541/2021	EPI_ISL_2666711	EPI_SET_230103zt	Delta	2021-06-14
hCoV-19/Denmark/DCGC-112542/2021	EPI_ISL_2666712	EPI_SET_230103mu	Alpha	2021-05-31
hCoV-19/Denmark/DCGC-112544/2021	EPI_ISL_2666714	EPI_SET_230103mu	Alpha	2021-05-31
hCoV-19/Denmark/DCGC-112549/2021	EPI_ISL_3074426	EPI_SET_230103mu	Alpha	2021-05-31
hCoV-19/Denmark/DCGC-112550/2021	EPI_ISL_3074427	EPI_SET_230103mu	Alpha	2021-06-07
hCoV-19/Denmark/DCGC-112560/2021	EPI_ISL_3074428	EPI_SET_230103mu	Alpha	2021-05-31
hCoV-19/Denmark/DCGC-112568/2021	EPI_ISL_3074430	EPI_SET_230103mu	Alpha	2021-06-07
hCoV-19/Denmark/DCGC-112583/2021	EPI_ISL_2666739	EPI_SET_230103mu	Alpha	2021-06-07
hCoV-19/Denmark/DCGC-112592/2021	EPI_ISL_2666747	EPI_SET_230103mu	Alpha	2021-05-31
hCoV-19/Denmark/DCGC-112597/2021	EPI_ISL_3074433	EPI_SET_230103mu	Alpha	2021-05-31
hCoV-19/Denmark/DCGC-112607/2021	EPI_ISL_2666758	EPI_SET_230103mu	Alpha	2021-05-31
hCoV-19/Denmark/DCGC-112614/2021	EPI_ISL_2666764	EPI_SET_230103mu	Alpha	2021-05-31
hCoV-19/Denmark/DCGC-112623/2021	EPI_ISL_2666772	EPI_SET_230103mu	Alpha	2021-05-31
hCoV-19/Denmark/DCGC-112625/2021	EPI_ISL_2666773	EPI_SET_230103mu	Alpha	2021-05-31
hCoV-19/Denmark/DCGC-112629/2021	EPI_ISL_2666777	EPI_SET_230103mu	Alpha	2021-06-07
hCoV-19/Denmark/DCGC-112635/2021	EPI_ISL_2666781	EPI_SET_230103mu	Alpha	2021-06-07
hCoV-19/Denmark/DCGC-112637/2021	EPI_ISL_2666783	EPI_SET_230103mu	Alpha	2021-05-31
hCoV-19/Denmark/DCGC-112645/2021	EPI_ISL_2666788	EPI_SET_230103mu	Alpha	2021-05-31
hCoV-19/Denmark/DCGC-112656/2021	EPI_ISL_3074442	EPI_SET_230103mu	Alpha	2021-05-31
hCoV-19/Denmark/DCGC-112658/2021	EPI_ISL_2666797	EPI_SET_230103mu	Alpha	2021-05-31
hCoV-19/Denmark/DCGC-112661/2021	EPI_ISL_2666799	EPI_SET_230103mu	Alpha	2021-05-31
hCoV-19/Denmark/DCGC-112662/2021	EPI_ISL_3074443	EPI_SET_230103mu	Alpha	2021-06-07
hCoV-19/Denmark/DCGC-112665/2021	EPI_ISL_2666800	EPI_SET_230103mu	Alpha	2021-06-07
hCoV-19/Denmark/DCGC-112673/2021	EPI_ISL_3074446	EPI_SET_230103mu	Alpha	2021-05-31
hCoV-19/Denmark/DCGC-112678/2021	EPI_ISL_2666810	EPI_SET_230103mu	Alpha	2021-05-31
hCoV-19/Denmark/DCGC-112685/2021	EPI_ISL_2666815	EPI_SET_230103mu	Alpha	2021-05-31
hCoV-19/Denmark/DCGC-112688/2021	EPI_ISL_2666818	EPI_SET_230103mu	Alpha	2021-05-31
hCoV-19/Denmark/DCGC-112708/2021	EPI_ISL_3074449	EPI_SET_230103mu	Alpha	2021-05-31
hCoV-19/Denmark/DCGC-112712/2021	EPI_ISL_2666836	EPI_SET_230103mu	Alpha	2021-05-31
hCoV-19/Denmark/DCGC-112713/2021	EPI_ISL_2666837	EPI_SET_230103mu	Alpha	2021-05-31
hCoV-19/Denmark/DCGC-112721/2021	EPI_ISL_2666842	EPI_SET_230103mu	Alpha	2021-05-31
hCoV-19/Denmark/DCGC-112724/2021	EPI_ISL_2666844	EPI_SET_230103mu	Alpha	2021-05-31
hCoV-19/Denmark/DCGC-112726/2021	EPI_ISL_2666846	EPI_SET_230103mu	Alpha	2021-05-31
hCoV-19/Denmark/DCGC-112729/2021	EPI_ISL_2666848	EPI_SET_230103mu	Alpha	2021-05-31
hCoV-19/Denmark/DCGC-112733/2021	EPI_ISL_3074455	EPI_SET_230103mu	Alpha	2021-06-07
hCoV-19/Denmark/DCGC-112737/2021	EPI_ISL_2666852	EPI_SET_230103mu	Alpha	2021-06-07
hCoV-19/Denmark/DCGC-112743/2021	EPI_ISL_2666855	EPI_SET_230103mu	Alpha	2021-05-31
hCoV-19/Denmark/DCGC-112746/2021	EPI_ISL_3074458	EPI_SET_230103mu	Alpha	2021-05-24
hCoV-19/Denmark/DCGC-112758/2021	EPI_ISL_2666866	EPI_SET_230103mu	Alpha	2021-06-07
hCoV-19/Denmark/DCGC-112760/2021	EPI_ISL_2666868	EPI_SET_230103mu	Alpha	2021-05-31
hCoV-19/Denmark/DCGC-112765/2021	EPI_ISL_3074459	EPI_SET_230103mu	Alpha	2021-05-31
hCoV-19/Denmark/DCGC-112777/2021	EPI_ISL_2666879	EPI_SET_230103mu	Alpha	2021-05-31
hCoV-19/Denmark/DCGC-112791/2021	EPI_ISL_3074464	EPI_SET_230103mu	Alpha	2021-05-31
hCoV-19/Denmark/DCGC-112794/2021	EPI_ISL_2666890	EPI_SET_230103mu	Alpha	2021-05-31
hCoV-19/Denmark/DCGC-112802/2021	EPI_ISL_3074465	EPI_SET_230103mu	Alpha	2021-06-07
hCoV-19/Denmark/DCGC-112805/2021	EPI_ISL_2666898	EPI_SET_230103mu	Alpha	2021-05-31
hCoV-19/Denmark/DCGC-112807/2021	EPI_ISL_2666900	EPI_SET_230103mu	Alpha	2021-05-31
hCoV-19/Denmark/DCGC-112814/2021	EPI_ISL_2666906	EPI_SET_230103mu	Alpha	2021-05-31
hCoV-19/Denmark/DCGC-112817/2021	EPI_ISL_2666909	EPI_SET_230103mu	Alpha	2021-06-07
hCoV-19/Denmark/DCGC-112820/2021	EPI_ISL_3074467	EPI_SET_230103mu	Alpha	2021-05-31
hCoV-19/Denmark/DCGC-112827/2021	EPI_ISL_2666915	EPI_SET_230103mu	Alpha	2021-06-07
hCoV-19/Denmark/DCGC-112828/2021	EPI_ISL_2666916	EPI_SET_230103mu	Alpha	2021-05-31
hCoV-19/Denmark/DCGC-112834/2021	EPI_ISL_2666922	EPI_SET_230103mu	Alpha	2021-06-07
hCoV-19/Denmark/DCGC-112843/2021	EPI_ISL_2666928	EPI_SET_230103mu	Alpha	2021-05-31
hCoV-19/Denmark/DCGC-112845/2021	EPI_ISL_2666930	EPI_SET_230103mu	Alpha	2021-06-07
hCoV-19/Denmark/DCGC-112852/2021	EPI_ISL_3074470	EPI_SET_230103mu	Alpha	2021-05-31
hCoV-19/Denmark/DCGC-112861/2021	EPI_ISL_2666943	EPI_SET_230103mu	Alpha	2021-05-31
hCoV-19/Denmark/DCGC-112863/2021	EPI_ISL_2666945	EPI_SET_230103mu	Alpha	2021-05-31
hCoV-19/Denmark/DCGC-112879/2021	EPI_ISL_3074471	EPI_SET_230103mu	Alpha	2021-05-31
hCoV-19/Denmark/DCGC-112886/2021	EPI_ISL_2666963	EPI_SET_230103mu	Alpha	2021-06-07
hCoV-19/Denmark/DCGC-112897/2021	EPI_ISL_2666971	EPI_SET_230103mu	Alpha	2021-06-07
hCoV-19/Denmark/DCGC-112900/2021	EPI_ISL_2666973	EPI_SET_230103mu	Alpha	2021-05-31
hCoV-19/Denmark/DCGC-112904/2021	EPI_ISL_2666976	EPI_SET_230103mu	Alpha	2021-05-31
hCoV-19/Denmark/DCGC-112908/2021	EPI_ISL_2666980	EPI_SET_230103mu	Alpha	2021-06-07
hCoV-19/Denmark/DCGC-112918/2021	EPI_ISL_2666986	EPI_SET_230103mu	Alpha	2021-05-31
hCoV-19/Denmark/DCGC-112922/2021	EPI_ISL_3074478	EPI_SET_230103mu	Alpha	2021-06-07
hCoV-19/Denmark/DCGC-112923/2021	EPI_ISL_2666989	EPI_SET_230103mu	Alpha	2021-05-31
hCoV-19/Denmark/DCGC-112928/2021	EPI_ISL_2666993	EPI_SET_230103mu	Alpha	2021-06-07
hCoV-19/Denmark/DCGC-112932/2021	EPI_ISL_2666996	EPI_SET_230103mu	Alpha	2021-05-31
hCoV-19/Denmark/DCGC-112933/2021	EPI_ISL_2666997	EPI_SET_230103mu	Alpha	2021-05-31
hCoV-19/Denmark/DCGC-112936/2021	EPI_ISL_2666999	EPI_SET_230103mu	Alpha	2021-06-14
hCoV-19/Denmark/DCGC-112939/2021	EPI_ISL_2667001	EPI_SET_230103mu	Alpha	2021-05-31
hCoV-19/Denmark/DCGC-112940/2021	EPI_ISL_3074481	EPI_SET_230103mu	Alpha	2021-06-14
hCoV-19/Denmark/DCGC-112947/2021	EPI_ISL_2667007	EPI_SET_230103mu	Alpha	2021-05-31
hCoV-19/Denmark/DCGC-112950/2021	EPI_ISL_2667009	EPI_SET_230103mu	Alpha	2021-06-07
hCoV-19/Denmark/DCGC-112953/2021	EPI_ISL_3074483	EPI_SET_230103mu	Alpha	2021-05-31
hCoV-19/Denmark/DCGC-112956/2021	EPI_ISL_3074484	EPI_SET_230103mu	Alpha	2021-05-31
hCoV-19/Denmark/DCGC-112960/2021	EPI_ISL_3074485	EPI_SET_230103mu	Alpha	2021-05-31
hCoV-19/Denmark/DCGC-112964/2021	EPI_ISL_2667019	EPI_SET_230103mu	Alpha	2021-06-07
hCoV-19/Denmark/DCGC-112975/2021	EPI_ISL_2667027	EPI_SET_230103mu	Alpha	2021-05-31
hCoV-19/Denmark/DCGC-112976/2021	EPI_ISL_2667028	EPI_SET_230103mu	Alpha	2021-05-31
hCoV-19/Denmark/DCGC-112986/2021	EPI_ISL_3074489	EPI_SET_230103mu	Alpha	2021-05-31
hCoV-19/Denmark/DCGC-112998/2021	EPI_ISL_2667040	EPI_SET_230103mu	Alpha	2021-05-31
hCoV-19/Denmark/DCGC-112999/2021	EPI_ISL_2667041	EPI_SET_230103mu	Alpha	2021-05-31
hCoV-19/Denmark/DCGC-113004/2021	EPI_ISL_2667046	EPI_SET_230103mu	Alpha	2021-05-31
hCoV-19/Denmark/DCGC-113024/2021	EPI_ISL_2667060	EPI_SET_230103mu	Alpha	2021-06-07
hCoV-19/Denmark/DCGC-113025/2021	EPI_ISL_3074494	EPI_SET_230103mu	Alpha	2021-05-31
hCoV-19/Denmark/DCGC-113034/2021	EPI_ISL_2667067	EPI_SET_230103mu	Alpha	2021-06-07
hCoV-19/Denmark/DCGC-113035/2021	EPI_ISL_2667068	EPI_SET_230103mu	Alpha	2021-05-31
hCoV-19/Denmark/DCGC-113037/2021	EPI_ISL_2667070	EPI_SET_230103mu	Alpha	2021-05-31
hCoV-19/Denmark/DCGC-113039/2021	EPI_ISL_2667071	EPI_SET_230103mu	Alpha	2021-05-31
hCoV-19/Denmark/DCGC-113055/2021	EPI_ISL_2667080	EPI_SET_230103mu	Alpha	2021-06-07
hCoV-19/Denmark/DCGC-113058/2021	EPI_ISL_3074500	EPI_SET_230103mu	Alpha	2021-05-31
hCoV-19/Denmark/DCGC-113060/2021	EPI_ISL_3074501	EPI_SET_230103mu	Alpha	2021-05-24
hCoV-19/Denmark/DCGC-113064/2021	EPI_ISL_2667085	EPI_SET_230103mu	Alpha	2021-06-07
hCoV-19/Denmark/DCGC-113067/2021	EPI_ISL_2667087	EPI_SET_230103mu	Alpha	2021-05-31
hCoV-19/Denmark/DCGC-113072/2021	EPI_ISL_2667092	EPI_SET_230103mu	Alpha	2021-06-07
hCoV-19/Denmark/DCGC-113073/2021	EPI_ISL_2667093	EPI_SET_230103mu	Alpha	2021-05-31
hCoV-19/Denmark/DCGC-113075/2021	EPI_ISL_2667095	EPI_SET_230103mu	Alpha	2021-05-31
hCoV-19/Denmark/DCGC-113078/2021	EPI_ISL_3074502	EPI_SET_230103mu	Alpha	2021-05-31
hCoV-19/Denmark/DCGC-113089/2021	EPI_ISL_2667104	EPI_SET_230103mu	Alpha	2021-06-07
hCoV-19/Denmark/DCGC-113094/2021	EPI_ISL_2667106	EPI_SET_230103mu	Alpha	2021-05-31
hCoV-19/Denmark/DCGC-113097/2021	EPI_ISL_2667109	EPI_SET_230103mu	Alpha	2021-05-31
hCoV-19/Denmark/DCGC-113102/2021	EPI_ISL_2667112	EPI_SET_230103mu	Alpha	2021-05-31
hCoV-19/Denmark/DCGC-113107/2021	EPI_ISL_2667117	EPI_SET_230103mu	Alpha	2021-05-31
hCoV-19/Denmark/DCGC-113109/2021	EPI_ISL_2667119	EPI_SET_230103mu	Alpha	2021-05-31
hCoV-19/Denmark/DCGC-113112/2021	EPI_ISL_2667121	EPI_SET_230103mu	Alpha	2021-05-31
hCoV-19/Denmark/DCGC-113113/2021	EPI_ISL_2667122	EPI_SET_230103mu	Alpha	2021-05-31
hCoV-19/Denmark/DCGC-113115/2021	EPI_ISL_3074509	EPI_SET_230103mu	Alpha	2021-06-14
hCoV-19/Denmark/DCGC-113127/2021	EPI_ISL_2667130	EPI_SET_230103mu	Alpha	2021-05-31
hCoV-19/Denmark/DCGC-113131/2021	EPI_ISL_2667133	EPI_SET_230103mu	Alpha	2021-06-07
hCoV-19/Denmark/DCGC-113138/2021	EPI_ISL_2667139	EPI_SET_230103mu	Alpha	2021-05-31
hCoV-19/Denmark/DCGC-113142/2021	EPI_ISL_2667142	EPI_SET_230103mu	Alpha	2021-05-31
hCoV-19/Denmark/DCGC-113150/2021	EPI_ISL_3074513	EPI_SET_230103mu	Alpha	2021-05-31
hCoV-19/Denmark/DCGC-113152/2021	EPI_ISL_3074514	EPI_SET_230103mu	Alpha	2021-05-31
hCoV-19/Denmark/DCGC-113153/2021	EPI_ISL_2667148	EPI_SET_230103mu	Alpha	2021-05-31
hCoV-19/Denmark/DCGC-113154/2021	EPI_ISL_3074515	EPI_SET_230103mu	Alpha	2021-06-07
hCoV-19/Denmark/DCGC-113162/2021	EPI_ISL_2667153	EPI_SET_230103mu	Alpha	2021-05-31
hCoV-19/Denmark/DCGC-113166/2021	EPI_ISL_2667156	EPI_SET_230103mu	Alpha	2021-06-07
hCoV-19/Denmark/DCGC-113175/2021	EPI_ISL_2667162	EPI_SET_230103mu	Alpha	2021-05-31
hCoV-19/Denmark/DCGC-113176/2021	EPI_ISL_2667163	EPI_SET_230103mu	Alpha	2021-06-07
hCoV-19/Denmark/DCGC-113177/2021	EPI_ISL_3074518	EPI_SET_230103mu	Alpha	2021-05-31
hCoV-19/Denmark/DCGC-113178/2021	EPI_ISL_2667164	EPI_SET_230103mu	Alpha	2021-05-31
hCoV-19/Denmark/DCGC-113180/2021	EPI_ISL_2667165	EPI_SET_230103mu	Alpha	2021-06-07
hCoV-19/Denmark/DCGC-113193/2021	EPI_ISL_2667174	EPI_SET_230103mu	Alpha	2021-05-31
hCoV-19/Denmark/DCGC-113197/2021	EPI_ISL_2667176	EPI_SET_230103mu	Alpha	2021-05-31
hCoV-19/Denmark/DCGC-113199/2021	EPI_ISL_3074520	EPI_SET_230103mu	Alpha	2021-05-31
hCoV-19/Denmark/DCGC-113203/2021	EPI_ISL_2667181	EPI_SET_230103mu	Alpha	2021-05-31
hCoV-19/Denmark/DCGC-113216/2021	EPI_ISL_3074524	EPI_SET_230103mu	Alpha	2021-05-31
hCoV-19/Denmark/DCGC-113222/2021	EPI_ISL_2667193	EPI_SET_230103mu	Alpha	2021-06-07
hCoV-19/Denmark/DCGC-113223/2021	EPI_ISL_3074525	EPI_SET_230103mu	Alpha	2021-05-31
hCoV-19/Denmark/DCGC-113226/2021	EPI_ISL_2667195	EPI_SET_230103mu	Alpha	2021-05-31
hCoV-19/Denmark/DCGC-113231/2021	EPI_ISL_3074526	EPI_SET_230103mu	Alpha	2021-05-31
hCoV-19/Denmark/DCGC-113243/2021	EPI_ISL_2667210	EPI_SET_230103mu	Alpha	2021-05-31
hCoV-19/Denmark/DCGC-113255/2021	EPI_ISL_2667220	EPI_SET_230103mu	Alpha	2021-06-07
hCoV-19/Denmark/DCGC-113259/2021	EPI_ISL_3074528	EPI_SET_230103mu	Alpha	2021-06-07
hCoV-19/Denmark/DCGC-113265/2021	EPI_ISL_2667225	EPI_SET_230103mu	Alpha	2021-05-31
hCoV-19/Denmark/DCGC-113269/2021	EPI_ISL_3074531	EPI_SET_230103mu	Alpha	2021-05-31
hCoV-19/Denmark/DCGC-113272/2021	EPI_ISL_2667229	EPI_SET_230103mu	Alpha	2021-05-31
hCoV-19/Denmark/DCGC-113275/2021	EPI_ISL_3074532	EPI_SET_230103mu	Alpha	2021-05-31
hCoV-19/Denmark/DCGC-113276/2021	EPI_ISL_2667232	EPI_SET_230103mu	Alpha	2021-05-31
hCoV-19/Denmark/DCGC-113278/2021	EPI_ISL_3074533	EPI_SET_230103mu	Alpha	2021-06-07
hCoV-19/Denmark/DCGC-113285/2021	EPI_ISL_2667237	EPI_SET_230103mu	Alpha	2021-05-31
hCoV-19/Denmark/DCGC-113295/2021	EPI_ISL_2667246	EPI_SET_230103mu	Alpha	2021-05-31
hCoV-19/Denmark/DCGC-113298/2021	EPI_ISL_2667248	EPI_SET_230103mu	Alpha	2021-05-31
hCoV-19/Denmark/DCGC-113301/2021	EPI_ISL_3074537	EPI_SET_230103mu	Alpha	2021-05-31
hCoV-19/Denmark/DCGC-113314/2021	EPI_ISL_2667257	EPI_SET_230103mu	Alpha	2021-05-31
hCoV-19/Denmark/DCGC-113321/2021	EPI_ISL_2667263	EPI_SET_230103mu	Alpha	2021-06-07
hCoV-19/Denmark/DCGC-113325/2021	EPI_ISL_2667267	EPI_SET_230103mu	Alpha	2021-05-31
hCoV-19/Denmark/DCGC-113327/2021	EPI_ISL_2667269	EPI_SET_230103mu	Alpha	2021-06-07
hCoV-19/Denmark/DCGC-113328/2021	EPI_ISL_2667270	EPI_SET_230103mu	Alpha	2021-05-31
hCoV-19/Denmark/DCGC-113330/2021	EPI_ISL_3074541	EPI_SET_230103mu	Alpha	2021-05-31
hCoV-19/Denmark/DCGC-113333/2021	EPI_ISL_2667273	EPI_SET_230103mu	Alpha	2021-05-31
hCoV-19/Denmark/DCGC-113336/2021	EPI_ISL_2667275	EPI_SET_230103mu	Alpha	2021-05-31
hCoV-19/Denmark/DCGC-113341/2021	EPI_ISL_2667278	EPI_SET_230103mu	Alpha	2021-06-07
hCoV-19/Denmark/DCGC-113344/2021	EPI_ISL_3074542	EPI_SET_230103mu	Alpha	2021-05-31
hCoV-19/Denmark/DCGC-113347/2021	EPI_ISL_2667283	EPI_SET_230103mu	Alpha	2021-05-31
hCoV-19/Denmark/DCGC-113370/2021	EPI_ISL_2667298	EPI_SET_230103mu	Alpha	2021-05-31
hCoV-19/Denmark/DCGC-113375/2021	EPI_ISL_2667302	EPI_SET_230103mu	Alpha	2021-05-31
hCoV-19/Denmark/DCGC-113381/2021	EPI_ISL_2667307	EPI_SET_230103mu	Alpha	2021-05-31
hCoV-19/Denmark/DCGC-113390/2021	EPI_ISL_2667314	EPI_SET_230103mu	Alpha	2021-05-31
hCoV-19/Denmark/DCGC-113403/2021	EPI_ISL_2667322	EPI_SET_230103mu	Alpha	2021-06-07
hCoV-19/Denmark/DCGC-113404/2021	EPI_ISL_3074545	EPI_SET_230103mu	Alpha	2021-05-31
hCoV-19/Denmark/DCGC-113405/2021	EPI_ISL_2667323	EPI_SET_230103mu	Alpha	2021-05-31
hCoV-19/Denmark/DCGC-113409/2021	EPI_ISL_2667326	EPI_SET_230103mu	Alpha	2021-05-31
hCoV-19/Denmark/DCGC-113414/2021	EPI_ISL_2667330	EPI_SET_230103mu	Alpha	2021-05-31
hCoV-19/Denmark/DCGC-113418/2021	EPI_ISL_2667334	EPI_SET_230103mu	Alpha	2021-05-31
hCoV-19/Denmark/DCGC-113424/2021	EPI_ISL_3074546	EPI_SET_230103mu	Alpha	2021-05-31
hCoV-19/Denmark/DCGC-113426/2021	EPI_ISL_2667339	EPI_SET_230103mu	Alpha	2021-05-31
hCoV-19/Denmark/DCGC-113427/2021	EPI_ISL_2667340	EPI_SET_230103mu	Alpha	2021-05-31
hCoV-19/Denmark/DCGC-113430/2021	EPI_ISL_3074548	EPI_SET_230103mu	Alpha	2021-06-07
hCoV-19/Denmark/DCGC-113433/2021	EPI_ISL_2667343	EPI_SET_230103mu	Alpha	2021-05-31
hCoV-19/Denmark/DCGC-113435/2021	EPI_ISL_3074550	EPI_SET_230103mu	Alpha	2021-06-07
hCoV-19/Denmark/DCGC-113442/2021	EPI_ISL_2667349	EPI_SET_230103mu	Alpha	2021-06-07
hCoV-19/Denmark/DCGC-113450/2021	EPI_ISL_2667356	EPI_SET_230103mu	Alpha	2021-05-31
hCoV-19/Denmark/DCGC-113451/2021	EPI_ISL_3074551	EPI_SET_230103mu	Alpha	2021-05-31
hCoV-19/Denmark/DCGC-113458/2021	EPI_ISL_2667361	EPI_SET_230103mu	Alpha	2021-05-31
hCoV-19/Denmark/DCGC-113462/2021	EPI_ISL_2667363	EPI_SET_230103mu	Alpha	2021-05-31
hCoV-19/Denmark/DCGC-113470/2021	EPI_ISL_2667371	EPI_SET_230103mu	Alpha	2021-06-14
hCoV-19/Denmark/DCGC-113471/2021	EPI_ISL_2667372	EPI_SET_230103mu	Alpha	2021-06-07
hCoV-19/Denmark/DCGC-113478/2021	EPI_ISL_2667379	EPI_SET_230103mu	Alpha	2021-06-07
hCoV-19/Denmark/DCGC-113479/2021	EPI_ISL_3074554	EPI_SET_230103mu	Alpha	2021-06-14
hCoV-19/Denmark/DCGC-113494/2021	EPI_ISL_2667389	EPI_SET_230103mu	Alpha	2021-06-14
hCoV-19/Denmark/DCGC-113501/2021	EPI_ISL_2667394	EPI_SET_230103mu	Alpha	2021-05-31
hCoV-19/Denmark/DCGC-113503/2021	EPI_ISL_2667395	EPI_SET_230103mu	Alpha	2021-05-31
hCoV-19/Denmark/DCGC-113508/2021	EPI_ISL_2667400	EPI_SET_230103mu	Alpha	2021-05-31
hCoV-19/Denmark/DCGC-113511/2021	EPI_ISL_2667402	EPI_SET_230103mu	Alpha	2021-06-07
hCoV-19/Denmark/DCGC-113515/2021	EPI_ISL_3074558	EPI_SET_230103mu	Alpha	2021-05-31
hCoV-19/Denmark/DCGC-113517/2021	EPI_ISL_2667407	EPI_SET_230103mu	Alpha	2021-05-31
hCoV-19/Denmark/DCGC-113519/2021	EPI_ISL_2667409	EPI_SET_230103mu	Alpha	2021-05-31
hCoV-19/Denmark/DCGC-113521/2021	EPI_ISL_3074559	EPI_SET_230103mu	Alpha	2021-05-31
hCoV-19/Denmark/DCGC-113540/2021	EPI_ISL_2667424	EPI_SET_230103mu	Alpha	2021-05-31
hCoV-19/Denmark/DCGC-113548/2021	EPI_ISL_3074564	EPI_SET_230103mu	Alpha	2021-05-31
hCoV-19/Denmark/DCGC-113554/2021	EPI_ISL_2667435	EPI_SET_230103mu	Alpha	2021-06-14
hCoV-19/Denmark/DCGC-113562/2021	EPI_ISL_2667441	EPI_SET_230103mu	Alpha	2021-06-07
hCoV-19/Denmark/DCGC-113573/2021	EPI_ISL_2667451	EPI_SET_230103mu	Alpha	2021-05-31
hCoV-19/Denmark/DCGC-113574/2021	EPI_ISL_3074567	EPI_SET_230103mu	Alpha	2021-05-31
hCoV-19/Denmark/DCGC-113599/2021	EPI_ISL_2667469	EPI_SET_230103mu	Alpha	2021-05-31
hCoV-19/Denmark/DCGC-113601/2021	EPI_ISL_2667471	EPI_SET_230103mu	Alpha	2021-05-31
hCoV-19/Denmark/DCGC-113602/2021	EPI_ISL_2667472	EPI_SET_230103mu	Alpha	2021-06-14
hCoV-19/Denmark/DCGC-113603/2021	EPI_ISL_2667473	EPI_SET_230103mu	Alpha	2021-06-07
hCoV-19/Denmark/DCGC-113606/2021	EPI_ISL_2667476	EPI_SET_230103mu	Alpha	2021-06-14
hCoV-19/Denmark/DCGC-113614/2021	EPI_ISL_2667482	EPI_SET_230103mu	Alpha	2021-05-31
hCoV-19/Denmark/DCGC-113618/2021	EPI_ISL_3074571	EPI_SET_230103mu	Alpha	2021-06-07
hCoV-19/Denmark/DCGC-113622/2021	EPI_ISL_2667489	EPI_SET_230103mu	Alpha	2021-05-31
hCoV-19/Denmark/DCGC-113643/2021	EPI_ISL_2667501	EPI_SET_230103mu	Alpha	2021-05-31
hCoV-19/Denmark/DCGC-113648/2021	EPI_ISL_3074577	EPI_SET_230103mu	Alpha	2021-05-31
hCoV-19/Denmark/DCGC-113650/2021	EPI_ISL_2667506	EPI_SET_230103mu	Alpha	2021-06-07
hCoV-19/Denmark/DCGC-113651/2021	EPI_ISL_2667507	EPI_SET_230103mu	Alpha	2021-05-31
hCoV-19/Denmark/DCGC-113654/2021	EPI_ISL_3074578	EPI_SET_230103mu	Alpha	2021-05-31
hCoV-19/Denmark/DCGC-113660/2021	EPI_ISL_2667512	EPI_SET_230103mu	Alpha	2021-05-31
hCoV-19/Denmark/DCGC-113671/2021	EPI_ISL_3074581	EPI_SET_230103mu	Alpha	2021-05-31
hCoV-19/Denmark/DCGC-113673/2021	EPI_ISL_2667521	EPI_SET_230103mu	Alpha	2021-06-07
hCoV-19/Denmark/DCGC-113680/2021	EPI_ISL_3074583	EPI_SET_230103mu	Alpha	2021-05-31
hCoV-19/Denmark/DCGC-113685/2021	EPI_ISL_2667529	EPI_SET_230103mu	Alpha	2021-05-31
hCoV-19/Denmark/DCGC-113691/2021	EPI_ISL_3074585	EPI_SET_230103mu	Alpha	2021-05-31
hCoV-19/Denmark/DCGC-113693/2021	EPI_ISL_3074586	EPI_SET_230103mu	Alpha	2021-05-24
hCoV-19/Denmark/DCGC-113713/2021	EPI_ISL_3074588	EPI_SET_230103mu	Alpha	2021-05-31
hCoV-19/Denmark/DCGC-113716/2021	EPI_ISL_2667546	EPI_SET_230103mu	Alpha	2021-05-31
hCoV-19/Denmark/DCGC-113725/2021	EPI_ISL_3074590	EPI_SET_230103mu	Alpha	2021-05-31
hCoV-19/Denmark/DCGC-113744/2021	EPI_ISL_2667567	EPI_SET_230103mu	Alpha	2021-05-31
hCoV-19/Denmark/DCGC-113751/2021	EPI_ISL_3074592	EPI_SET_230103mu	Alpha	2021-05-31
hCoV-19/Denmark/DCGC-113756/2021	EPI_ISL_2667575	EPI_SET_230103mu	Alpha	2021-05-31
hCoV-19/Denmark/DCGC-113757/2021	EPI_ISL_3074593	EPI_SET_230103mu	Alpha	2021-05-31
hCoV-19/Denmark/DCGC-113766/2021	EPI_ISL_2667583	EPI_SET_230103mu	Alpha	2021-05-31
hCoV-19/Denmark/DCGC-113769/2021	EPI_ISL_2667586	EPI_SET_230103mu	Alpha	2021-06-14
hCoV-19/Denmark/DCGC-113778/2021	EPI_ISL_3074596	EPI_SET_230103mu	Alpha	2021-05-31
hCoV-19/Denmark/DCGC-113782/2021	EPI_ISL_2667593	EPI_SET_230103mu	Alpha	2021-06-07
hCoV-19/Denmark/DCGC-113785/2021	EPI_ISL_2667596	EPI_SET_230103mu	Alpha	2021-05-31
hCoV-19/Denmark/DCGC-113787/2021	EPI_ISL_2667598	EPI_SET_230103mu	Alpha	2021-06-07
hCoV-19/Denmark/DCGC-113788/2021	EPI_ISL_3074598	EPI_SET_230103mu	Alpha	2021-06-07
hCoV-19/Denmark/DCGC-113791/2021	EPI_ISL_3074599	EPI_SET_230103mu	Alpha	2021-05-31
hCoV-19/Denmark/DCGC-113799/2021	EPI_ISL_2667604	EPI_SET_230103mu	Alpha	2021-05-31
hCoV-19/Denmark/DCGC-113817/2021	EPI_ISL_3074600	EPI_SET_230103mu	Alpha	2021-05-31
hCoV-19/Denmark/DCGC-113818/2021	EPI_ISL_2667619	EPI_SET_230103mu	Alpha	2021-06-07
hCoV-19/Denmark/DCGC-113825/2021	EPI_ISL_3074601	EPI_SET_230103mu	Alpha	2021-05-31
hCoV-19/Denmark/DCGC-113826/2021	EPI_ISL_2667624	EPI_SET_230103mu	Alpha	2021-06-07
hCoV-19/Denmark/DCGC-113829/2021	EPI_ISL_2667627	EPI_SET_230103mu	Alpha	2021-05-31
hCoV-19/Denmark/DCGC-113830/2021	EPI_ISL_2667628	EPI_SET_230103zt	Delta	2021-05-31
hCoV-19/Denmark/DCGC-113835/2021	EPI_ISL_2667631	EPI_SET_230103mu	Alpha	2021-05-31
hCoV-19/Denmark/DCGC-113836/2021	EPI_ISL_2667632	EPI_SET_230103mu	Alpha	2021-05-31
hCoV-19/Denmark/DCGC-113841/2021	EPI_ISL_2667636	EPI_SET_230103mu	Alpha	2021-05-31
hCoV-19/Denmark/DCGC-113844/2021	EPI_ISL_2667637	EPI_SET_230103mu	Alpha	2021-05-31
hCoV-19/Denmark/DCGC-113851/2021	EPI_ISL_2667642	EPI_SET_230103mu	Alpha	2021-05-31
hCoV-19/Denmark/DCGC-113861/2021	EPI_ISL_2667650	EPI_SET_230103mu	Alpha	2021-06-07
hCoV-19/Denmark/DCGC-113866/2021	EPI_ISL_2667653	EPI_SET_230103mu	Alpha	2021-06-07
hCoV-19/Denmark/DCGC-113872/2021	EPI_ISL_2667659	EPI_SET_230103mu	Alpha	2021-05-31
hCoV-19/Denmark/DCGC-113875/2021	EPI_ISL_2667662	EPI_SET_230103mu	Alpha	2021-06-07
hCoV-19/Denmark/DCGC-113878/2021	EPI_ISL_2667664	EPI_SET_230103mu	Alpha	2021-05-31
hCoV-19/Denmark/DCGC-113880/2021	EPI_ISL_2667666	EPI_SET_230103mu	Alpha	2021-06-07
hCoV-19/Denmark/DCGC-113888/2021	EPI_ISL_2667674	EPI_SET_230103mu	Alpha	2021-05-31
hCoV-19/Denmark/DCGC-113899/2021	EPI_ISL_2667682	EPI_SET_230103mu	Alpha	2021-05-31
hCoV-19/Denmark/DCGC-113903/2021	EPI_ISL_2667685	EPI_SET_230103mu	Alpha	2021-05-31
hCoV-19/Denmark/DCGC-113911/2021	EPI_ISL_2667690	EPI_SET_230103mu	Alpha	2021-05-31
hCoV-19/Denmark/DCGC-113912/2021	EPI_ISL_2667691	EPI_SET_230103mu	Alpha	2021-05-31
hCoV-19/Denmark/DCGC-113915/2021	EPI_ISL_2667693	EPI_SET_230103mu	Alpha	2021-05-31
hCoV-19/Denmark/DCGC-113920/2021	EPI_ISL_2667698	EPI_SET_230103mu	Alpha	2021-05-31
hCoV-19/Denmark/DCGC-113930/2021	EPI_ISL_3074610	EPI_SET_230103mu	Alpha	2021-05-31
hCoV-19/Denmark/DCGC-113933/2021	EPI_ISL_2667708	EPI_SET_230103mu	Alpha	2021-06-07
hCoV-19/Denmark/DCGC-113934/2021	EPI_ISL_2667709	EPI_SET_230103mu	Alpha	2021-06-07
hCoV-19/Denmark/DCGC-113943/2021	EPI_ISL_2667713	EPI_SET_230103mu	Alpha	2021-05-31
hCoV-19/Denmark/DCGC-113952/2021	EPI_ISL_2667722	EPI_SET_230103mu	Alpha	2021-06-07
hCoV-19/Denmark/DCGC-113964/2021	EPI_ISL_2667731	EPI_SET_230103mu	Alpha	2021-05-31
hCoV-19/Denmark/DCGC-113975/2021	EPI_ISL_2667736	EPI_SET_230103mu	Alpha	2021-05-31
hCoV-19/Denmark/DCGC-113978/2021	EPI_ISL_2667739	EPI_SET_230103mu	Alpha	2021-05-31
hCoV-19/Denmark/DCGC-113987/2021	EPI_ISL_2667747	EPI_SET_230103mu	Alpha	2021-06-07
hCoV-19/Denmark/DCGC-113988/2021	EPI_ISL_2667748	EPI_SET_230103mu	Alpha	2021-06-07
hCoV-19/Denmark/DCGC-113993/2021	EPI_ISL_2667753	EPI_SET_230103mu	Alpha	2021-05-31
hCoV-19/Denmark/DCGC-114001/2021	EPI_ISL_2667761	EPI_SET_230103mu	Alpha	2021-06-07
hCoV-19/Denmark/DCGC-114003/2021	EPI_ISL_2667762	EPI_SET_230103mu	Alpha	2021-06-07
hCoV-19/Denmark/DCGC-114004/2021	EPI_ISL_2667763	EPI_SET_230103mu	Alpha	2021-05-31
hCoV-19/Denmark/DCGC-114012/2021	EPI_ISL_2667769	EPI_SET_230103mu	Alpha	2021-05-31
hCoV-19/Denmark/DCGC-114020/2021	EPI_ISL_2667776	EPI_SET_230103mu	Alpha	2021-05-31
hCoV-19/Denmark/DCGC-114021/2021	EPI_ISL_3074621	EPI_SET_230103mu	Alpha	2021-05-31
hCoV-19/Denmark/DCGC-114038/2021	EPI_ISL_3074622	EPI_SET_230103mu	Alpha	2021-05-31
hCoV-19/Denmark/DCGC-114041/2021	EPI_ISL_2667791	EPI_SET_230103mu	Alpha	2021-06-07
hCoV-19/Denmark/DCGC-114045/2021	EPI_ISL_2667794	EPI_SET_230103mu	Alpha	2021-05-31
hCoV-19/Denmark/DCGC-114047/2021	EPI_ISL_2667796	EPI_SET_230103mu	Alpha	2021-05-31
hCoV-19/Denmark/DCGC-114048/2021	EPI_ISL_3074623	EPI_SET_230103mu	Alpha	2021-06-07
hCoV-19/Denmark/DCGC-114056/2021	EPI_ISL_2667802	EPI_SET_230103mu	Alpha	2021-06-14
hCoV-19/Denmark/DCGC-114070/2021	EPI_ISL_2667811	EPI_SET_230103mu	Alpha	2021-05-31
hCoV-19/Denmark/DCGC-114074/2021	EPI_ISL_2667814	EPI_SET_230103mu	Alpha	2021-05-31
hCoV-19/Denmark/DCGC-114078/2021	EPI_ISL_2667818	EPI_SET_230103mu	Alpha	2021-05-31
hCoV-19/Denmark/DCGC-114079/2021	EPI_ISL_3074625	EPI_SET_230103mu	Alpha	2021-05-31
hCoV-19/Denmark/DCGC-114081/2021	EPI_ISL_3074626	EPI_SET_230103mu	Alpha	2021-06-07
hCoV-19/Denmark/DCGC-114086/2021	EPI_ISL_2667824	EPI_SET_230103mu	Alpha	2021-05-31
hCoV-19/Denmark/DCGC-114087/2021	EPI_ISL_2667825	EPI_SET_230103mu	Alpha	2021-05-31
hCoV-19/Denmark/DCGC-114093/2021	EPI_ISL_3074627	EPI_SET_230103mu	Alpha	2021-05-31
hCoV-19/Denmark/DCGC-114094/2021	EPI_ISL_3074628	EPI_SET_230103mu	Alpha	2021-05-31
hCoV-19/Denmark/DCGC-114104/2021	EPI_ISL_2667835	EPI_SET_230103mu	Alpha	2021-05-31
hCoV-19/Denmark/DCGC-114111/2021	EPI_ISL_2667840	EPI_SET_230103mu	Alpha	2021-05-31
hCoV-19/Denmark/DCGC-114112/2021	EPI_ISL_3074630	EPI_SET_230103mu	Alpha	2021-05-31
hCoV-19/Denmark/DCGC-114125/2021	EPI_ISL_2667847	EPI_SET_230103mu	Alpha	2021-05-24
hCoV-19/Denmark/DCGC-114127/2021	EPI_ISL_2667849	EPI_SET_230103mu	Alpha	2021-05-31
hCoV-19/Denmark/DCGC-114128/2021	EPI_ISL_2667850	EPI_SET_230103mu	Alpha	2021-05-31
hCoV-19/Denmark/DCGC-114129/2021	EPI_ISL_2667851	EPI_SET_230103mu	Alpha	2021-06-07
hCoV-19/Denmark/DCGC-114131/2021	EPI_ISL_3074633	EPI_SET_230103mu	Alpha	2021-05-31
hCoV-19/Denmark/DCGC-114135/2021	EPI_ISL_2667853	EPI_SET_230103mu	Alpha	2021-05-31
hCoV-19/Denmark/DCGC-114137/2021	EPI_ISL_2667855	EPI_SET_230103mu	Alpha	2021-06-07
hCoV-19/Denmark/DCGC-114142/2021	EPI_ISL_2667859	EPI_SET_230103mu	Alpha	2021-05-31
hCoV-19/Denmark/DCGC-114147/2021	EPI_ISL_3074635	EPI_SET_230103mu	Alpha	2021-05-31
hCoV-19/Denmark/DCGC-114153/2021	EPI_ISL_3074637	EPI_SET_230103mu	Alpha	2021-05-31
hCoV-19/Denmark/DCGC-114158/2021	EPI_ISL_2667870	EPI_SET_230103mu	Alpha	2021-05-31
hCoV-19/Denmark/DCGC-114163/2021	EPI_ISL_2667873	EPI_SET_230103mu	Alpha	2021-05-31
hCoV-19/Denmark/DCGC-114170/2021	EPI_ISL_3074641	EPI_SET_230103mu	Alpha	2021-05-31
hCoV-19/Denmark/DCGC-114183/2021	EPI_ISL_2667886	EPI_SET_230103mu	Alpha	2021-05-31
hCoV-19/Denmark/DCGC-114192/2021	EPI_ISL_2667892	EPI_SET_230103mu	Alpha	2021-05-31
hCoV-19/Denmark/DCGC-114203/2021	EPI_ISL_2667898	EPI_SET_230103mu	Alpha	2021-05-31
hCoV-19/Denmark/DCGC-114204/2021	EPI_ISL_2667899	EPI_SET_230103mu	Alpha	2021-06-14
hCoV-19/Denmark/DCGC-114206/2021	EPI_ISL_2667901	EPI_SET_230103mu	Alpha	2021-05-31
hCoV-19/Denmark/DCGC-114209/2021	EPI_ISL_3074645	EPI_SET_230103mu	Alpha	2021-06-07
hCoV-19/Denmark/DCGC-114212/2021	EPI_ISL_2667906	EPI_SET_230103mu	Alpha	2021-05-31
hCoV-19/Denmark/DCGC-114224/2021	EPI_ISL_2667917	EPI_SET_230103mu	Alpha	2021-05-31
hCoV-19/Denmark/DCGC-114225/2021	EPI_ISL_2667918	EPI_SET_230103mu	Alpha	2021-05-31
hCoV-19/Denmark/DCGC-114227/2021	EPI_ISL_2667919	EPI_SET_230103mu	Alpha	2021-05-31
hCoV-19/Denmark/DCGC-114229/2021	EPI_ISL_2667921	EPI_SET_230103mu	Alpha	2021-05-31
hCoV-19/Denmark/DCGC-114230/2021	EPI_ISL_2667922	EPI_SET_230103mu	Alpha	2021-05-31
hCoV-19/Denmark/DCGC-114232/2021	EPI_ISL_2667924	EPI_SET_230103mu	Alpha	2021-05-31
hCoV-19/Denmark/DCGC-114236/2021	EPI_ISL_2667928	EPI_SET_230103mu	Alpha	2021-05-31
hCoV-19/Denmark/DCGC-114239/2021	EPI_ISL_3074648	EPI_SET_230103mu	Alpha	2021-06-07
hCoV-19/Denmark/DCGC-114242/2021	EPI_ISL_2667933	EPI_SET_230103mu	Alpha	2021-05-31
hCoV-19/Denmark/DCGC-114246/2021	EPI_ISL_3074649	EPI_SET_230103mu	Alpha	2021-06-07
hCoV-19/Denmark/DCGC-114261/2021	EPI_ISL_2667949	EPI_SET_230103mu	Alpha	2021-06-07
hCoV-19/Denmark/DCGC-114262/2021	EPI_ISL_2667950	EPI_SET_230103mu	Alpha	2021-06-07
hCoV-19/Denmark/DCGC-114268/2021	EPI_ISL_3074651	EPI_SET_230103mu	Alpha	2021-06-07
hCoV-19/Denmark/DCGC-114271/2021	EPI_ISL_2667955	EPI_SET_230103mu	Alpha	2021-05-31
hCoV-19/Denmark/DCGC-114274/2021	EPI_ISL_2667957	EPI_SET_230103mu	Alpha	2021-06-14
hCoV-19/Denmark/DCGC-114276/2021	EPI_ISL_2667958	EPI_SET_230103mu	Alpha	2021-06-14
hCoV-19/Denmark/DCGC-114278/2021	EPI_ISL_2667960	EPI_SET_230103mu	Alpha	2021-06-07
hCoV-19/Denmark/DCGC-114279/2021	EPI_ISL_3074653	EPI_SET_230103mu	Alpha	2021-06-07
hCoV-19/Denmark/DCGC-114283/2021	EPI_ISL_2667964	EPI_SET_230103mu	Alpha	2021-05-31
hCoV-19/Denmark/DCGC-114287/2021	EPI_ISL_2667968	EPI_SET_230103mu	Alpha	2021-05-31
hCoV-19/Denmark/DCGC-114290/2021	EPI_ISL_2667971	EPI_SET_230103mu	Alpha	2021-05-31
hCoV-19/Denmark/DCGC-114292/2021	EPI_ISL_3074654	EPI_SET_230103mu	Alpha	2021-05-31
hCoV-19/Denmark/DCGC-114294/2021	EPI_ISL_2667973	EPI_SET_230103mu	Alpha	2021-05-31
hCoV-19/Denmark/DCGC-114302/2021	EPI_ISL_2667977	EPI_SET_230103mu	Alpha	2021-05-31
hCoV-19/Denmark/DCGC-114304/2021	EPI_ISL_2667979	EPI_SET_230103mu	Alpha	2021-05-31
hCoV-19/Denmark/DCGC-114305/2021	EPI_ISL_2667980	EPI_SET_230103mu	Alpha	2021-05-31
hCoV-19/Denmark/DCGC-114307/2021	EPI_ISL_2667982	EPI_SET_230103mu	Alpha	2021-06-07
hCoV-19/Denmark/DCGC-114313/2021	EPI_ISL_3074656	EPI_SET_230103mu	Alpha	2021-05-31
hCoV-19/Denmark/DCGC-114317/2021	EPI_ISL_3074657	EPI_SET_230103mu	Alpha	2021-05-31
hCoV-19/Denmark/DCGC-114320/2021	EPI_ISL_2667991	EPI_SET_230103mu	Alpha	2021-05-31
hCoV-19/Denmark/DCGC-114327/2021	EPI_ISL_2667996	EPI_SET_230103mu	Alpha	2021-05-31
hCoV-19/Denmark/DCGC-114331/2021	EPI_ISL_2668000	EPI_SET_230103mu	Alpha	2021-05-31
hCoV-19/Denmark/DCGC-114333/2021	EPI_ISL_2668001	EPI_SET_230103mu	Alpha	2021-05-31
hCoV-19/Denmark/DCGC-114337/2021	EPI_ISL_2668004	EPI_SET_230103mu	Alpha	2021-05-31
hCoV-19/Denmark/DCGC-114340/2021	EPI_ISL_2668007	EPI_SET_230103mu	Alpha	2021-06-07
hCoV-19/Denmark/DCGC-114365/2021	EPI_ISL_2668023	EPI_SET_230103mu	Alpha	2021-05-31
hCoV-19/Denmark/DCGC-114388/2021	EPI_ISL_2668042	EPI_SET_230103mu	Alpha	2021-05-31
hCoV-19/Denmark/DCGC-114394/2021	EPI_ISL_2668048	EPI_SET_230103mu	Alpha	2021-05-31
hCoV-19/Denmark/DCGC-114400/2021	EPI_ISL_2668054	EPI_SET_230103mu	Alpha	2021-05-31
hCoV-19/Denmark/DCGC-114402/2021	EPI_ISL_2668056	EPI_SET_230103mu	Alpha	2021-05-31
hCoV-19/Denmark/DCGC-114404/2021	EPI_ISL_3074667	EPI_SET_230103mu	Alpha	2021-06-07
hCoV-19/Denmark/DCGC-114407/2021	EPI_ISL_2668059	EPI_SET_230103mu	Alpha	2021-05-31
hCoV-19/Denmark/DCGC-114413/2021	EPI_ISL_2668063	EPI_SET_230103mu	Alpha	2021-05-31
hCoV-19/Denmark/DCGC-114414/2021	EPI_ISL_3074669	EPI_SET_230103mu	Alpha	2021-05-31
hCoV-19/Denmark/DCGC-114415/2021	EPI_ISL_2668064	EPI_SET_230103mu	Alpha	2021-06-07
hCoV-19/Denmark/DCGC-114416/2021	EPI_ISL_2668065	EPI_SET_230103mu	Alpha	2021-06-07
hCoV-19/Denmark/DCGC-114418/2021	EPI_ISL_2668067	EPI_SET_230103mu	Alpha	2021-05-31
hCoV-19/Denmark/DCGC-114428/2021	EPI_ISL_3074673	EPI_SET_230103mu	Alpha	2021-05-31
hCoV-19/Denmark/DCGC-114440/2021	EPI_ISL_2668079	EPI_SET_230103mu	Alpha	2021-05-31
hCoV-19/Denmark/DCGC-114453/2021	EPI_ISL_2668087	EPI_SET_230103mu	Alpha	2021-06-07
hCoV-19/Denmark/DCGC-114454/2021	EPI_ISL_2668088	EPI_SET_230103mu	Alpha	2021-05-31
hCoV-19/Denmark/DCGC-114455/2021	EPI_ISL_2668089	EPI_SET_230103mu	Alpha	2021-06-07
hCoV-19/Denmark/DCGC-114463/2021	EPI_ISL_2668094	EPI_SET_230103mu	Alpha	2021-05-31
hCoV-19/Denmark/DCGC-114468/2021	EPI_ISL_2668099	EPI_SET_230103mu	Alpha	2021-05-31
hCoV-19/Denmark/DCGC-114469/2021	EPI_ISL_3074679	EPI_SET_230103mu	Alpha	2021-05-31
hCoV-19/Denmark/DCGC-114479/2021	EPI_ISL_3074680	EPI_SET_230103mu	Alpha	2021-06-07
hCoV-19/Denmark/DCGC-114480/2021	EPI_ISL_2668107	EPI_SET_230103mu	Alpha	2021-05-31
hCoV-19/Denmark/DCGC-114486/2021	EPI_ISL_2668111	EPI_SET_230103mu	Alpha	2021-05-31
hCoV-19/Denmark/DCGC-114487/2021	EPI_ISL_3074682	EPI_SET_230103mu	Alpha	2021-05-31
hCoV-19/Denmark/DCGC-114488/2021	EPI_ISL_2668112	EPI_SET_230103mu	Alpha	2021-06-07
hCoV-19/Denmark/DCGC-114499/2021	EPI_ISL_3074683	EPI_SET_230103mu	Alpha	2021-05-31
hCoV-19/Denmark/DCGC-114501/2021	EPI_ISL_2668122	EPI_SET_230103mu	Alpha	2021-05-31
hCoV-19/Denmark/DCGC-114503/2021	EPI_ISL_2668124	EPI_SET_230103mu	Alpha	2021-05-31
hCoV-19/Denmark/DCGC-114508/2021	EPI_ISL_2668128	EPI_SET_230103mu	Alpha	2021-05-31
hCoV-19/Denmark/DCGC-114511/2021	EPI_ISL_2668130	EPI_SET_230103mu	Alpha	2021-05-31
hCoV-19/Denmark/DCGC-114512/2021	EPI_ISL_3074685	EPI_SET_230103mu	Alpha	2021-06-07
hCoV-19/Denmark/DCGC-114517/2021	EPI_ISL_2668135	EPI_SET_230103mu	Alpha	2021-06-07
hCoV-19/Denmark/DCGC-114518/2021	EPI_ISL_2668136	EPI_SET_230103mu	Alpha	2021-05-31
hCoV-19/Denmark/DCGC-114528/2021	EPI_ISL_2668142	EPI_SET_230103mu	Alpha	2021-05-31
hCoV-19/Denmark/DCGC-114531/2021	EPI_ISL_2668145	EPI_SET_230103mu	Alpha	2021-05-31
hCoV-19/Denmark/DCGC-114533/2021	EPI_ISL_2668147	EPI_SET_230103mu	Alpha	2021-06-07
hCoV-19/Denmark/DCGC-114537/2021	EPI_ISL_2668150	EPI_SET_230103mu	Alpha	2021-05-31
hCoV-19/Denmark/DCGC-114543/2021	EPI_ISL_2668155	EPI_SET_230103mu	Alpha	2021-05-31
hCoV-19/Denmark/DCGC-114545/2021	EPI_ISL_2668157	EPI_SET_230103mu	Alpha	2021-06-07
hCoV-19/Denmark/DCGC-114547/2021	EPI_ISL_2668158	EPI_SET_230103mu	Alpha	2021-05-31
hCoV-19/Denmark/DCGC-114552/2021	EPI_ISL_2668160	EPI_SET_230103mu	Alpha	2021-05-31
hCoV-19/Denmark/DCGC-114559/2021	EPI_ISL_2668166	EPI_SET_230103mu	Alpha	2021-06-07
hCoV-19/Denmark/DCGC-114561/2021	EPI_ISL_2668168	EPI_SET_230103mu	Alpha	2021-05-31
hCoV-19/Denmark/DCGC-114562/2021	EPI_ISL_2668169	EPI_SET_230103mu	Alpha	2021-05-31
hCoV-19/Denmark/DCGC-114564/2021	EPI_ISL_2668170	EPI_SET_230103mu	Alpha	2021-06-07
hCoV-19/Denmark/DCGC-114567/2021	EPI_ISL_2668172	EPI_SET_230103mu	Alpha	2021-06-07
hCoV-19/Denmark/DCGC-114579/2021	EPI_ISL_2668181	EPI_SET_230103mu	Alpha	2021-05-31
hCoV-19/Denmark/DCGC-114582/2021	EPI_ISL_3074692	EPI_SET_230103mu	Alpha	2021-06-07
hCoV-19/Denmark/DCGC-114584/2021	EPI_ISL_3074693	EPI_SET_230103mu	Alpha	2021-06-07
hCoV-19/Denmark/DCGC-114585/2021	EPI_ISL_2668184	EPI_SET_230103mu	Alpha	2021-05-31
hCoV-19/Denmark/DCGC-114586/2021	EPI_ISL_2668185	EPI_SET_230103mu	Alpha	2021-06-14
hCoV-19/Denmark/DCGC-114587/2021	EPI_ISL_2668186	EPI_SET_230103mu	Alpha	2021-06-07
hCoV-19/Denmark/DCGC-114599/2021	EPI_ISL_2668191	EPI_SET_230103mu	Alpha	2021-05-31
hCoV-19/Denmark/DCGC-114604/2021	EPI_ISL_2668193	EPI_SET_230103mu	Alpha	2021-05-31
hCoV-19/Denmark/DCGC-114609/2021	EPI_ISL_2668197	EPI_SET_230103mu	Alpha	2021-06-07
hCoV-19/Denmark/DCGC-114612/2021	EPI_ISL_3074697	EPI_SET_230103mu	Alpha	2021-06-07
hCoV-19/Denmark/DCGC-114618/2021	EPI_ISL_2668205	EPI_SET_230103mu	Alpha	2021-06-07
hCoV-19/Denmark/DCGC-114620/2021	EPI_ISL_2668206	EPI_SET_230103mu	Alpha	2021-05-31
hCoV-19/Denmark/DCGC-114621/2021	EPI_ISL_2668207	EPI_SET_230103mu	Alpha	2021-06-07
hCoV-19/Denmark/DCGC-114630/2021	EPI_ISL_2668214	EPI_SET_230103mu	Alpha	2021-05-31
hCoV-19/Denmark/DCGC-114634/2021	EPI_ISL_2668218	EPI_SET_230103mu	Alpha	2021-05-31
hCoV-19/Denmark/DCGC-114635/2021	EPI_ISL_2668219	EPI_SET_230103mu	Alpha	2021-05-31
hCoV-19/Denmark/DCGC-114642/2021	EPI_ISL_2668222	EPI_SET_230103mu	Alpha	2021-06-07
hCoV-19/Denmark/DCGC-114647/2021	EPI_ISL_2668226	EPI_SET_230103mu	Alpha	2021-05-31
hCoV-19/Denmark/DCGC-114654/2021	EPI_ISL_2668231	EPI_SET_230103mu	Alpha	2021-05-31
hCoV-19/Denmark/DCGC-114655/2021	EPI_ISL_3074702	EPI_SET_230103mu	Alpha	2021-05-31
hCoV-19/Denmark/DCGC-114663/2021	EPI_ISL_3074705	EPI_SET_230103mu	Alpha	2021-06-07
hCoV-19/Denmark/DCGC-114664/2021	EPI_ISL_2668237	EPI_SET_230103mu	Alpha	2021-06-07
hCoV-19/Denmark/DCGC-114670/2021	EPI_ISL_2668240	EPI_SET_230103mu	Alpha	2021-05-31
hCoV-19/Denmark/DCGC-114671/2021	EPI_ISL_2668241	EPI_SET_230103mu	Alpha	2021-06-07
hCoV-19/Denmark/DCGC-114676/2021	EPI_ISL_2668246	EPI_SET_230103mu	Alpha	2021-05-24
hCoV-19/Denmark/DCGC-114680/2021	EPI_ISL_2668250	EPI_SET_230103mu	Alpha	2021-06-07
hCoV-19/Denmark/DCGC-114681/2021	EPI_ISL_2668251	EPI_SET_230103mu	Alpha	2021-05-31
hCoV-19/Denmark/DCGC-114684/2021	EPI_ISL_2668254	EPI_SET_230103mu	Alpha	2021-06-07
hCoV-19/Denmark/DCGC-114690/2021	EPI_ISL_2668259	EPI_SET_230103mu	Alpha	2021-05-31
hCoV-19/Denmark/DCGC-114694/2021	EPI_ISL_2668262	EPI_SET_230103mu	Alpha	2021-05-31
hCoV-19/Denmark/DCGC-114698/2021	EPI_ISL_2668265	EPI_SET_230103mu	Alpha	2021-06-14
hCoV-19/Denmark/DCGC-114701/2021	EPI_ISL_2668267	EPI_SET_230103mu	Alpha	2021-05-31
hCoV-19/Denmark/DCGC-114708/2021	EPI_ISL_3074710	EPI_SET_230103mu	Alpha	2021-05-31
hCoV-19/Denmark/DCGC-114712/2021	EPI_ISL_2668275	EPI_SET_230103mu	Alpha	2021-06-07
hCoV-19/Denmark/DCGC-114713/2021	EPI_ISL_2668276	EPI_SET_230103mu	Alpha	2021-05-31
hCoV-19/Denmark/DCGC-114719/2021	EPI_ISL_2668280	EPI_SET_230103mu	Alpha	2021-06-07
hCoV-19/Denmark/DCGC-114733/2021	EPI_ISL_2668287	EPI_SET_230103mu	Alpha	2021-06-14
hCoV-19/Denmark/DCGC-114734/2021	EPI_ISL_2668288	EPI_SET_230103mu	Alpha	2021-05-31
hCoV-19/Denmark/DCGC-114742/2021	EPI_ISL_3074715	EPI_SET_230103mu	Alpha	2021-05-31
hCoV-19/Denmark/DCGC-114743/2021	EPI_ISL_2668294	EPI_SET_230103mu	Alpha	2021-05-31
hCoV-19/Denmark/DCGC-114762/2021	EPI_ISL_3074716	EPI_SET_230103mu	Alpha	2021-06-07
hCoV-19/Denmark/DCGC-114764/2021	EPI_ISL_3074717	EPI_SET_230103mu	Alpha	2021-05-31
hCoV-19/Denmark/DCGC-114769/2021	EPI_ISL_2668313	EPI_SET_230103mu	Alpha	2021-06-07
hCoV-19/Denmark/DCGC-114796/2021	EPI_ISL_2668334	EPI_SET_230103mu	Alpha	2021-06-07
hCoV-19/Denmark/DCGC-114802/2021	EPI_ISL_3074724	EPI_SET_230103mu	Alpha	2021-06-07
hCoV-19/Denmark/DCGC-114817/2021	EPI_ISL_2668348	EPI_SET_230103mu	Alpha	2021-05-31
hCoV-19/Denmark/DCGC-114818/2021	EPI_ISL_2668349	EPI_SET_230103mu	Alpha	2021-05-31
hCoV-19/Denmark/DCGC-114822/2021	EPI_ISL_2668353	EPI_SET_230103mu	Alpha	2021-05-31
hCoV-19/Denmark/DCGC-114829/2021	EPI_ISL_3074729	EPI_SET_230103mu	Alpha	2021-05-31
hCoV-19/Denmark/DCGC-114839/2021	EPI_ISL_2668365	EPI_SET_230103mu	Alpha	2021-06-07
hCoV-19/Denmark/DCGC-114842/2021	EPI_ISL_2668368	EPI_SET_230103mu	Alpha	2021-06-07
hCoV-19/Denmark/DCGC-114853/2021	EPI_ISL_2668376	EPI_SET_230103mu	Alpha	2021-05-31
hCoV-19/Denmark/DCGC-114855/2021	EPI_ISL_2668378	EPI_SET_230103mu	Alpha	2021-06-07
hCoV-19/Denmark/DCGC-114862/2021	EPI_ISL_2668385	EPI_SET_230103mu	Alpha	2021-05-31
hCoV-19/Denmark/DCGC-114864/2021	EPI_ISL_2668387	EPI_SET_230103mu	Alpha	2021-05-31
hCoV-19/Denmark/DCGC-114865/2021	EPI_ISL_3074730	EPI_SET_230103mu	Alpha	2021-05-31
hCoV-19/Denmark/DCGC-114867/2021	EPI_ISL_2668389	EPI_SET_230103mu	Alpha	2021-05-31
hCoV-19/Denmark/DCGC-114868/2021	EPI_ISL_3074731	EPI_SET_230103mu	Alpha	2021-06-14
hCoV-19/Denmark/DCGC-114872/2021	EPI_ISL_2668392	EPI_SET_230103mu	Alpha	2021-06-07
hCoV-19/Denmark/DCGC-114877/2021	EPI_ISL_3074733	EPI_SET_230103mu	Alpha	2021-06-07
hCoV-19/Denmark/DCGC-114884/2021	EPI_ISL_2668401	EPI_SET_230103mu	Alpha	2021-05-31
hCoV-19/Denmark/DCGC-114893/2021	EPI_ISL_2668409	EPI_SET_230103mu	Alpha	2021-05-24
hCoV-19/Denmark/DCGC-114900/2021	EPI_ISL_2668415	EPI_SET_230103mu	Alpha	2021-05-31
hCoV-19/Denmark/DCGC-114903/2021	EPI_ISL_2668418	EPI_SET_230103mu	Alpha	2021-05-31
hCoV-19/Denmark/DCGC-114905/2021	EPI_ISL_3074735	EPI_SET_230103mu	Alpha	2021-06-07
hCoV-19/Denmark/DCGC-114907/2021	EPI_ISL_3074737	EPI_SET_230103mu	Alpha	2021-06-07
hCoV-19/Denmark/DCGC-114909/2021	EPI_ISL_2668420	EPI_SET_230103mu	Alpha	2021-06-07
hCoV-19/Denmark/DCGC-114914/2021	EPI_ISL_2668424	EPI_SET_230103mu	Alpha	2021-05-31
hCoV-19/Denmark/DCGC-114915/2021	EPI_ISL_2668425	EPI_SET_230103mu	Alpha	2021-05-31
hCoV-19/Denmark/DCGC-114932/2021	EPI_ISL_3074740	EPI_SET_230103mu	Alpha	2021-05-31
hCoV-19/Denmark/DCGC-114950/2021	EPI_ISL_3074742	EPI_SET_230103mu	Alpha	2021-05-31
hCoV-19/Denmark/DCGC-114951/2021	EPI_ISL_2668449	EPI_SET_230103mu	Alpha	2021-06-07
hCoV-19/Denmark/DCGC-114953/2021	EPI_ISL_2668451	EPI_SET_230103mu	Alpha	2021-05-31
hCoV-19/Denmark/DCGC-114954/2021	EPI_ISL_2668452	EPI_SET_230103mu	Alpha	2021-05-31
hCoV-19/Denmark/DCGC-114955/2021	EPI_ISL_2668453	EPI_SET_230103mu	Alpha	2021-05-31
hCoV-19/Denmark/DCGC-114974/2021	EPI_ISL_2668468	EPI_SET_230103mu	Alpha	2021-05-31
hCoV-19/Denmark/DCGC-114980/2021	EPI_ISL_3074746	EPI_SET_230103mu	Alpha	2021-05-31
hCoV-19/Denmark/DCGC-114982/2021	EPI_ISL_2668475	EPI_SET_230103mu	Alpha	2021-06-07
hCoV-19/Denmark/DCGC-114993/2021	EPI_ISL_2668484	EPI_SET_230103mu	Alpha	2021-05-31
hCoV-19/Denmark/DCGC-114998/2021	EPI_ISL_3074747	EPI_SET_230103mu	Alpha	2021-06-07
hCoV-19/Denmark/DCGC-115000/2021	EPI_ISL_2668489	EPI_SET_230103mu	Alpha	2021-05-31
hCoV-19/Denmark/DCGC-115012/2021	EPI_ISL_2668496	EPI_SET_230103mu	Alpha	2021-05-31
hCoV-19/Denmark/DCGC-115023/2021	EPI_ISL_2668505	EPI_SET_230103mu	Alpha	2021-05-31
hCoV-19/Denmark/DCGC-115030/2021	EPI_ISL_2668512	EPI_SET_230103mu	Alpha	2021-05-31
hCoV-19/Denmark/DCGC-115033/2021	EPI_ISL_3074750	EPI_SET_230103mu	Alpha	2021-05-31
hCoV-19/Denmark/DCGC-115035/2021	EPI_ISL_2668515	EPI_SET_230103mu	Alpha	2021-05-31
hCoV-19/Denmark/DCGC-115055/2021	EPI_ISL_2668528	EPI_SET_230103mu	Alpha	2021-05-31
hCoV-19/Denmark/DCGC-115066/2021	EPI_ISL_2668535	EPI_SET_230103mu	Alpha	2021-05-31
hCoV-19/Denmark/DCGC-115073/2021	EPI_ISL_3074756	EPI_SET_230103mu	Alpha	2021-06-07
hCoV-19/Denmark/DCGC-115074/2021	EPI_ISL_2668540	EPI_SET_230103mu	Alpha	2021-05-31
hCoV-19/Denmark/DCGC-115078/2021	EPI_ISL_2668543	EPI_SET_230103mu	Alpha	2021-05-31
hCoV-19/Denmark/DCGC-115085/2021	EPI_ISL_2668550	EPI_SET_230103mu	Alpha	2021-05-31
hCoV-19/Denmark/DCGC-115086/2021	EPI_ISL_3074757	EPI_SET_230103mu	Alpha	2021-06-07
hCoV-19/Denmark/DCGC-115087/2021	EPI_ISL_3074758	EPI_SET_230103mu	Alpha	2021-06-07
hCoV-19/Denmark/DCGC-115088/2021	EPI_ISL_2668551	EPI_SET_230103mu	Alpha	2021-06-07
hCoV-19/Denmark/DCGC-115092/2021	EPI_ISL_2668555	EPI_SET_230103mu	Alpha	2021-06-07
hCoV-19/Denmark/DCGC-115093/2021	EPI_ISL_3074759	EPI_SET_230103mu	Alpha	2021-06-14
hCoV-19/Denmark/DCGC-115120/2021	EPI_ISL_2668575	EPI_SET_230103mu	Alpha	2021-05-31
hCoV-19/Denmark/DCGC-115121/2021	EPI_ISL_3074760	EPI_SET_230103mu	Alpha	2021-06-14
hCoV-19/Denmark/DCGC-115123/2021	EPI_ISL_2668577	EPI_SET_230103mu	Alpha	2021-06-07
hCoV-19/Denmark/DCGC-115134/2021	EPI_ISL_2668587	EPI_SET_230103mu	Alpha	2021-05-31
hCoV-19/Denmark/DCGC-115148/2021	EPI_ISL_2668598	EPI_SET_230103mu	Alpha	2021-05-31
hCoV-19/Denmark/DCGC-115158/2021	EPI_ISL_2668606	EPI_SET_230103mu	Alpha	2021-05-24
hCoV-19/Denmark/DCGC-115160/2021	EPI_ISL_2668607	EPI_SET_230103mu	Alpha	2021-05-31
hCoV-19/Denmark/DCGC-115164/2021	EPI_ISL_2668610	EPI_SET_230103mu	Alpha	2021-05-31
hCoV-19/Denmark/DCGC-115166/2021	EPI_ISL_2668611	EPI_SET_230103mu	Alpha	2021-05-31
hCoV-19/Denmark/DCGC-115172/2021	EPI_ISL_2668616	EPI_SET_230103mu	Alpha	2021-05-31
hCoV-19/Denmark/DCGC-115173/2021	EPI_ISL_2668617	EPI_SET_230103mu	Alpha	2021-05-31
hCoV-19/Denmark/DCGC-115175/2021	EPI_ISL_3074763	EPI_SET_230103mu	Alpha	2021-05-31
hCoV-19/Denmark/DCGC-115178/2021	EPI_ISL_2668620	EPI_SET_230103mu	Alpha	2021-06-07
hCoV-19/Denmark/DCGC-115179/2021	EPI_ISL_2668621	EPI_SET_230103mu	Alpha	2021-05-31
hCoV-19/Denmark/DCGC-115188/2021	EPI_ISL_3074765	EPI_SET_230103mu	Alpha	2021-05-31
hCoV-19/Denmark/DCGC-115200/2021	EPI_ISL_2668636	EPI_SET_230103mu	Alpha	2021-05-31
hCoV-19/Denmark/DCGC-115202/2021	EPI_ISL_2668638	EPI_SET_230103mu	Alpha	2021-05-31
hCoV-19/Denmark/DCGC-115212/2021	EPI_ISL_2668647	EPI_SET_230103mu	Alpha	2021-06-07
hCoV-19/Denmark/DCGC-115228/2021	EPI_ISL_2668660	EPI_SET_230103mu	Alpha	2021-06-07
hCoV-19/Denmark/DCGC-115233/2021	EPI_ISL_2668665	EPI_SET_230103mu	Alpha	2021-06-14
hCoV-19/Denmark/DCGC-115247/2021	EPI_ISL_3074770	EPI_SET_230103mu	Alpha	2021-06-14
hCoV-19/Denmark/DCGC-115250/2021	EPI_ISL_2668677	EPI_SET_230103mu	Alpha	2021-05-31
hCoV-19/Denmark/DCGC-115251/2021	EPI_ISL_2668678	EPI_SET_230103mu	Alpha	2021-05-31
hCoV-19/Denmark/DCGC-115253/2021	EPI_ISL_2668679	EPI_SET_230103mu	Alpha	2021-05-31
hCoV-19/Denmark/DCGC-115256/2021	EPI_ISL_3074771	EPI_SET_230103mu	Alpha	2021-05-31
hCoV-19/Denmark/DCGC-115259/2021	EPI_ISL_2668683	EPI_SET_230103mu	Alpha	2021-05-31
hCoV-19/Denmark/DCGC-115271/2021	EPI_ISL_3074772	EPI_SET_230103mu	Alpha	2021-05-31
hCoV-19/Denmark/DCGC-115287/2021	EPI_ISL_3074776	EPI_SET_230103mu	Alpha	2021-05-31
hCoV-19/Denmark/DCGC-115291/2021	EPI_ISL_2668703	EPI_SET_230103zt	Delta	2021-06-07
hCoV-19/Denmark/DCGC-115296/2021	EPI_ISL_3074777	EPI_SET_230103mu	Alpha	2021-05-31
hCoV-19/Denmark/DCGC-115298/2021	EPI_ISL_2668707	EPI_SET_230103mu	Alpha	2021-05-31
hCoV-19/Denmark/DCGC-115305/2021	EPI_ISL_2668711	EPI_SET_230103mu	Alpha	2021-05-31
hCoV-19/Denmark/DCGC-115316/2021	EPI_ISL_2668719	EPI_SET_230103mu	Alpha	2021-05-31
hCoV-19/Denmark/DCGC-115318/2021	EPI_ISL_2668721	EPI_SET_230103mu	Alpha	2021-05-31
hCoV-19/Denmark/DCGC-115319/2021	EPI_ISL_3074782	EPI_SET_230103mu	Alpha	2021-05-31
hCoV-19/Denmark/DCGC-115320/2021	EPI_ISL_2668722	EPI_SET_230103mu	Alpha	2021-05-31
hCoV-19/Denmark/DCGC-115326/2021	EPI_ISL_3074783	EPI_SET_230103mu	Alpha	2021-05-31
hCoV-19/Denmark/DCGC-115327/2021	EPI_ISL_3074784	EPI_SET_230103mu	Alpha	2021-05-31
hCoV-19/Denmark/DCGC-115329/2021	EPI_ISL_2668728	EPI_SET_230103mu	Alpha	2021-05-31
hCoV-19/Denmark/DCGC-115332/2021	EPI_ISL_2668730	EPI_SET_230103mu	Alpha	2021-05-31
hCoV-19/Denmark/DCGC-115334/2021	EPI_ISL_2668732	EPI_SET_230103mu	Alpha	2021-05-31
hCoV-19/Denmark/DCGC-115335/2021	EPI_ISL_2668733	EPI_SET_230103mu	Alpha	2021-05-31
hCoV-19/Denmark/DCGC-115347/2021	EPI_ISL_2668743	EPI_SET_230103mu	Alpha	2021-05-31
hCoV-19/Denmark/DCGC-115362/2021	EPI_ISL_2668750	EPI_SET_230103mu	Alpha	2021-05-31
hCoV-19/Denmark/DCGC-115371/2021	EPI_ISL_2668758	EPI_SET_230103mu	Alpha	2021-06-07
hCoV-19/Denmark/DCGC-115387/2021	EPI_ISL_3074789	EPI_SET_230103mu	Alpha	2021-05-31
hCoV-19/Denmark/DCGC-115390/2021	EPI_ISL_2668772	EPI_SET_230103mu	Alpha	2021-06-07
hCoV-19/Denmark/DCGC-115396/2021	EPI_ISL_2668777	EPI_SET_230103mu	Alpha	2021-05-31
hCoV-19/Denmark/DCGC-115398/2021	EPI_ISL_2668778	EPI_SET_230103mu	Alpha	2021-05-31
hCoV-19/Denmark/DCGC-115401/2021	EPI_ISL_2668780	EPI_SET_230103mu	Alpha	2021-05-31
hCoV-19/Denmark/DCGC-115405/2021	EPI_ISL_3074791	EPI_SET_230103mu	Alpha	2021-05-31
hCoV-19/Denmark/DCGC-115415/2021	EPI_ISL_2668787	EPI_SET_230103mu	Alpha	2021-05-31
hCoV-19/Denmark/DCGC-115417/2021	EPI_ISL_2668788	EPI_SET_230103mu	Alpha	2021-05-31
hCoV-19/Denmark/DCGC-115419/2021	EPI_ISL_2668790	EPI_SET_230103mu	Alpha	2021-05-31
hCoV-19/Denmark/DCGC-115424/2021	EPI_ISL_2668792	EPI_SET_230103mu	Alpha	2021-05-31
hCoV-19/Denmark/DCGC-115427/2021	EPI_ISL_2668794	EPI_SET_230103mu	Alpha	2021-05-31
hCoV-19/Denmark/DCGC-115432/2021	EPI_ISL_2668798	EPI_SET_230103mu	Alpha	2021-05-31
hCoV-19/Denmark/DCGC-115444/2021	EPI_ISL_2668805	EPI_SET_230103mu	Alpha	2021-05-31
hCoV-19/Denmark/DCGC-115447/2021	EPI_ISL_2668808	EPI_SET_230103mu	Alpha	2021-06-07
hCoV-19/Denmark/DCGC-115448/2021	EPI_ISL_3074799	EPI_SET_230103mu	Alpha	2021-06-07
hCoV-19/Denmark/DCGC-115449/2021	EPI_ISL_2668809	EPI_SET_230103mu	Alpha	2021-05-31
hCoV-19/Denmark/DCGC-115454/2021	EPI_ISL_2668814	EPI_SET_230103mu	Alpha	2021-06-07
hCoV-19/Denmark/DCGC-115458/2021	EPI_ISL_3074800	EPI_SET_230103mu	Alpha	2021-06-07
hCoV-19/Denmark/DCGC-115459/2021	EPI_ISL_2668818	EPI_SET_230103mu	Alpha	2021-06-14
hCoV-19/Denmark/DCGC-115461/2021	EPI_ISL_2668820	EPI_SET_230103mu	Alpha	2021-05-31
hCoV-19/Denmark/DCGC-115464/2021	EPI_ISL_2668823	EPI_SET_230103mu	Alpha	2021-06-07
hCoV-19/Denmark/DCGC-115469/2021	EPI_ISL_2668828	EPI_SET_230103mu	Alpha	2021-05-31
hCoV-19/Denmark/DCGC-115479/2021	EPI_ISL_3074801	EPI_SET_230103mu	Alpha	2021-06-07
hCoV-19/Denmark/DCGC-115481/2021	EPI_ISL_2668836	EPI_SET_230103mu	Alpha	2021-05-31
hCoV-19/Denmark/DCGC-115485/2021	EPI_ISL_2668839	EPI_SET_230103mu	Alpha	2021-05-31
hCoV-19/Denmark/DCGC-115487/2021	EPI_ISL_2668841	EPI_SET_230103mu	Alpha	2021-05-31
hCoV-19/Denmark/DCGC-115488/2021	EPI_ISL_3074803	EPI_SET_230103mu	Alpha	2021-05-31
hCoV-19/Denmark/DCGC-115490/2021	EPI_ISL_2668843	EPI_SET_230103mu	Alpha	2021-05-31
hCoV-19/Denmark/DCGC-115496/2021	EPI_ISL_2668847	EPI_SET_230103mu	Alpha	2021-05-31
hCoV-19/Denmark/DCGC-115499/2021	EPI_ISL_2668849	EPI_SET_230103mu	Alpha	2021-05-31
hCoV-19/Denmark/DCGC-115505/2021	EPI_ISL_2668853	EPI_SET_230103mu	Alpha	2021-05-31
hCoV-19/Denmark/DCGC-115507/2021	EPI_ISL_2668854	EPI_SET_230103mu	Alpha	2021-05-31
hCoV-19/Denmark/DCGC-115514/2021	EPI_ISL_3074805	EPI_SET_230103mu	Alpha	2021-05-31
hCoV-19/Denmark/DCGC-115520/2021	EPI_ISL_2668864	EPI_SET_230103mu	Alpha	2021-06-07
hCoV-19/Denmark/DCGC-115522/2021	EPI_ISL_2668866	EPI_SET_230103mu	Alpha	2021-05-31
hCoV-19/Denmark/DCGC-115525/2021	EPI_ISL_2668868	EPI_SET_230103mu	Alpha	2021-05-31
hCoV-19/Denmark/DCGC-115530/2021	EPI_ISL_2668873	EPI_SET_230103mu	Alpha	2021-05-31
hCoV-19/Denmark/DCGC-115536/2021	EPI_ISL_2668877	EPI_SET_230103mu	Alpha	2021-06-07
hCoV-19/Denmark/DCGC-115547/2021	EPI_ISL_2668883	EPI_SET_230103mu	Alpha	2021-05-31
hCoV-19/Denmark/DCGC-115551/2021	EPI_ISL_2668886	EPI_SET_230103mu	Alpha	2021-05-31
hCoV-19/Denmark/DCGC-115559/2021	EPI_ISL_2668894	EPI_SET_230103mu	Alpha	2021-06-07
hCoV-19/Denmark/DCGC-115566/2021	EPI_ISL_3074808	EPI_SET_230103mu	Alpha	2021-05-31
hCoV-19/Denmark/DCGC-115567/2021	EPI_ISL_2668898	EPI_SET_230103mu	Alpha	2021-05-31
hCoV-19/Denmark/DCGC-115576/2021	EPI_ISL_2668901	EPI_SET_230103mu	Alpha	2021-05-31
hCoV-19/Denmark/DCGC-115580/2021	EPI_ISL_2668904	EPI_SET_230103mu	Alpha	2021-05-31
hCoV-19/Denmark/DCGC-115586/2021	EPI_ISL_2668908	EPI_SET_230103mu	Alpha	2021-05-31
hCoV-19/Denmark/DCGC-115592/2021	EPI_ISL_2668913	EPI_SET_230103mu	Alpha	2021-05-31
hCoV-19/Denmark/DCGC-115596/2021	EPI_ISL_2668917	EPI_SET_230103mu	Alpha	2021-06-07
hCoV-19/Denmark/DCGC-115607/2021	EPI_ISL_3074816	EPI_SET_230103mu	Alpha	2021-05-31
hCoV-19/Denmark/DCGC-115610/2021	EPI_ISL_2668927	EPI_SET_230103mu	Alpha	2021-05-31
hCoV-19/Denmark/DCGC-115617/2021	EPI_ISL_2668931	EPI_SET_230103mu	Alpha	2021-05-31
hCoV-19/Denmark/DCGC-115620/2021	EPI_ISL_3074819	EPI_SET_230103mu	Alpha	2021-05-31
hCoV-19/Denmark/DCGC-115625/2021	EPI_ISL_3074820	EPI_SET_230103mu	Alpha	2021-06-07
hCoV-19/Denmark/DCGC-115626/2021	EPI_ISL_3074821	EPI_SET_230103mu	Alpha	2021-05-31
hCoV-19/Denmark/DCGC-115635/2021	EPI_ISL_3074825	EPI_SET_230103mu	Alpha	2021-05-31
hCoV-19/Denmark/DCGC-115639/2021	EPI_ISL_2668943	EPI_SET_230103mu	Alpha	2021-05-31
hCoV-19/Denmark/DCGC-115641/2021	EPI_ISL_3074828	EPI_SET_230103mu	Alpha	2021-06-14
hCoV-19/Denmark/DCGC-115642/2021	EPI_ISL_2668944	EPI_SET_230103mu	Alpha	2021-06-07
hCoV-19/Denmark/DCGC-115648/2021	EPI_ISL_2668946	EPI_SET_230103mu	Alpha	2021-05-31
hCoV-19/Denmark/DCGC-115667/2021	EPI_ISL_2668959	EPI_SET_230103mu	Alpha	2021-05-31
hCoV-19/Denmark/DCGC-115668/2021	EPI_ISL_3074833	EPI_SET_230103mu	Alpha	2021-06-07
hCoV-19/Denmark/DCGC-115669/2021	EPI_ISL_2668960	EPI_SET_230103mu	Alpha	2021-06-07
hCoV-19/Denmark/DCGC-115676/2021	EPI_ISL_3074834	EPI_SET_230103mu	Alpha	2021-05-31
hCoV-19/Denmark/DCGC-115685/2021	EPI_ISL_2668971	EPI_SET_230103mu	Alpha	2021-06-07
hCoV-19/Denmark/DCGC-115689/2021	EPI_ISL_2668975	EPI_SET_230103mu	Alpha	2021-05-31
hCoV-19/Denmark/DCGC-115698/2021	EPI_ISL_2668981	EPI_SET_230103mu	Alpha	2021-05-31
hCoV-19/Denmark/DCGC-115702/2021	EPI_ISL_2668984	EPI_SET_230103mu	Alpha	2021-05-31
hCoV-19/Denmark/DCGC-115721/2021	EPI_ISL_3074838	EPI_SET_230103mu	Alpha	2021-05-31
hCoV-19/Denmark/DCGC-115730/2021	EPI_ISL_2669000	EPI_SET_230103mu	Alpha	2021-05-31
hCoV-19/Denmark/DCGC-115740/2021	EPI_ISL_2669008	EPI_SET_230103mu	Alpha	2021-06-07
hCoV-19/Denmark/DCGC-115741/2021	EPI_ISL_2669009	EPI_SET_230103mu	Alpha	2021-05-31
hCoV-19/Denmark/DCGC-115745/2021	EPI_ISL_2669013	EPI_SET_230103mu	Alpha	2021-05-31
hCoV-19/Denmark/DCGC-115753/2021	EPI_ISL_2669018	EPI_SET_230103mu	Alpha	2021-05-31
hCoV-19/Denmark/DCGC-115754/2021	EPI_ISL_2669019	EPI_SET_230103mu	Alpha	2021-06-07
hCoV-19/Denmark/DCGC-115763/2021	EPI_ISL_3074844	EPI_SET_230103mu	Alpha	2021-05-31
hCoV-19/Denmark/DCGC-115765/2021	EPI_ISL_2669025	EPI_SET_230103mu	Alpha	2021-05-31
hCoV-19/Denmark/DCGC-115775/2021	EPI_ISL_2669030	EPI_SET_230103mu	Alpha	2021-05-31
hCoV-19/Denmark/DCGC-115794/2021	EPI_ISL_2669044	EPI_SET_230103mu	Alpha	2021-06-07
hCoV-19/Denmark/DCGC-115815/2021	EPI_ISL_2669060	EPI_SET_230103mu	Alpha	2021-05-31
hCoV-19/Denmark/DCGC-115821/2021	EPI_ISL_2669065	EPI_SET_230103mu	Alpha	2021-05-31
hCoV-19/Denmark/DCGC-115826/2021	EPI_ISL_3074849	EPI_SET_230103mu	Alpha	2021-05-31
hCoV-19/Denmark/DCGC-115838/2021	EPI_ISL_2669077	EPI_SET_230103mu	Alpha	2021-05-31
hCoV-19/Denmark/DCGC-115844/2021	EPI_ISL_2669080	EPI_SET_230103mu	Alpha	2021-05-31
hCoV-19/Denmark/DCGC-115845/2021	EPI_ISL_2669081	EPI_SET_230103mu	Alpha	2021-05-31
hCoV-19/Denmark/DCGC-115853/2021	EPI_ISL_3074855	EPI_SET_230103mu	Alpha	2021-06-07
hCoV-19/Denmark/DCGC-115866/2021	EPI_ISL_2669094	EPI_SET_230103mu	Alpha	2021-05-31
hCoV-19/Denmark/DCGC-115867/2021	EPI_ISL_3074860	EPI_SET_230103mu	Alpha	2021-05-31
hCoV-19/Denmark/DCGC-115869/2021	EPI_ISL_2669095	EPI_SET_230103mu	Alpha	2021-06-07
hCoV-19/Denmark/DCGC-115876/2021	EPI_ISL_3074864	EPI_SET_230103mu	Alpha	2021-05-31
hCoV-19/Denmark/DCGC-115877/2021	EPI_ISL_2669098	EPI_SET_230103mu	Alpha	2021-06-07
hCoV-19/Denmark/DCGC-115878/2021	EPI_ISL_2669099	EPI_SET_230103mu	Alpha	2021-06-07
hCoV-19/Denmark/DCGC-115890/2021	EPI_ISL_2669109	EPI_SET_230103mu	Alpha	2021-06-07
hCoV-19/Denmark/DCGC-115891/2021	EPI_ISL_2669110	EPI_SET_230103mu	Alpha	2021-05-31
hCoV-19/Denmark/DCGC-115895/2021	EPI_ISL_3074865	EPI_SET_230103mu	Alpha	2021-05-31
hCoV-19/Denmark/DCGC-115898/2021	EPI_ISL_2669116	EPI_SET_230103mu	Alpha	2021-06-07
hCoV-19/Denmark/DCGC-115906/2021	EPI_ISL_2669121	EPI_SET_230103mu	Alpha	2021-05-31
hCoV-19/Denmark/DCGC-115907/2021	EPI_ISL_2669122	EPI_SET_230103mu	Alpha	2021-05-31
hCoV-19/Denmark/DCGC-115911/2021	EPI_ISL_2669125	EPI_SET_230103mu	Alpha	2021-06-07
hCoV-19/Denmark/DCGC-115934/2021	EPI_ISL_2669144	EPI_SET_230103mu	Alpha	2021-05-31
hCoV-19/Denmark/DCGC-115935/2021	EPI_ISL_2669145	EPI_SET_230103mu	Alpha	2021-06-07
hCoV-19/Denmark/DCGC-115938/2021	EPI_ISL_2669147	EPI_SET_230103mu	Alpha	2021-05-31
hCoV-19/Denmark/DCGC-115940/2021	EPI_ISL_3074869	EPI_SET_230103mu	Alpha	2021-05-31
hCoV-19/Denmark/DCGC-115948/2021	EPI_ISL_2669155	EPI_SET_230103mu	Alpha	2021-05-31
hCoV-19/Denmark/DCGC-115952/2021	EPI_ISL_2669159	EPI_SET_230103mu	Alpha	2021-05-31
hCoV-19/Denmark/DCGC-115954/2021	EPI_ISL_2669161	EPI_SET_230103mu	Alpha	2021-05-31
hCoV-19/Denmark/DCGC-115965/2021	EPI_ISL_2669167	EPI_SET_230103mu	Alpha	2021-06-07
hCoV-19/Denmark/DCGC-115972/2021	EPI_ISL_2669170	EPI_SET_230103mu	Alpha	2021-05-31
hCoV-19/Denmark/DCGC-115980/2021	EPI_ISL_2669176	EPI_SET_230103mu	Alpha	2021-05-31
hCoV-19/Denmark/DCGC-115982/2021	EPI_ISL_3074874	EPI_SET_230103mu	Alpha	2021-05-31
hCoV-19/Denmark/DCGC-115984/2021	EPI_ISL_2669178	EPI_SET_230103mu	Alpha	2021-05-31
hCoV-19/Denmark/DCGC-115986/2021	EPI_ISL_2669179	EPI_SET_230103mu	Alpha	2021-05-31
hCoV-19/Denmark/DCGC-115990/2021	EPI_ISL_2669183	EPI_SET_230103mu	Alpha	2021-05-31
hCoV-19/Denmark/DCGC-115996/2021	EPI_ISL_3074875	EPI_SET_230103mu	Alpha	2021-05-31
hCoV-19/Denmark/DCGC-116007/2021	EPI_ISL_2669197	EPI_SET_230103mu	Alpha	2021-05-31
hCoV-19/Denmark/DCGC-116013/2021	EPI_ISL_3074878	EPI_SET_230103mu	Alpha	2021-06-07
hCoV-19/Denmark/DCGC-116025/2021	EPI_ISL_2669207	EPI_SET_230103mu	Alpha	2021-06-07
hCoV-19/Denmark/DCGC-116031/2021	EPI_ISL_3074882	EPI_SET_230103mu	Alpha	2021-05-31
hCoV-19/Denmark/DCGC-116040/2021	EPI_ISL_2669216	EPI_SET_230103mu	Alpha	2021-05-31
hCoV-19/Denmark/DCGC-116042/2021	EPI_ISL_2669217	EPI_SET_230103mu	Alpha	2021-06-07
hCoV-19/Denmark/DCGC-116044/2021	EPI_ISL_2669219	EPI_SET_230103mu	Alpha	2021-05-31
hCoV-19/Denmark/DCGC-116050/2021	EPI_ISL_3074886	EPI_SET_230103mu	Alpha	2021-05-31
hCoV-19/Denmark/DCGC-116052/2021	EPI_ISL_2669224	EPI_SET_230103mu	Alpha	2021-06-07
hCoV-19/Denmark/DCGC-116054/2021	EPI_ISL_2669226	EPI_SET_230103mu	Alpha	2021-05-31
hCoV-19/Denmark/DCGC-116056/2021	EPI_ISL_2669227	EPI_SET_230103mu	Alpha	2021-05-31
hCoV-19/Denmark/DCGC-116075/2021	EPI_ISL_2669243	EPI_SET_230103mu	Alpha	2021-05-31
hCoV-19/Denmark/DCGC-116091/2021	EPI_ISL_3074890	EPI_SET_230103mu	Alpha	2021-05-31
hCoV-19/Denmark/DCGC-116099/2021	EPI_ISL_2669263	EPI_SET_230103mu	Alpha	2021-05-31
hCoV-19/Denmark/DCGC-116105/2021	EPI_ISL_2669266	EPI_SET_230103mu	Alpha	2021-05-31
hCoV-19/Denmark/DCGC-116109/2021	EPI_ISL_2669270	EPI_SET_230103mu	Alpha	2021-05-31
hCoV-19/Denmark/DCGC-116123/2021	EPI_ISL_2669283	EPI_SET_230103mu	Alpha	2021-05-31
hCoV-19/Denmark/DCGC-116126/2021	EPI_ISL_2669285	EPI_SET_230103mu	Alpha	2021-06-07
hCoV-19/Denmark/DCGC-116127/2021	EPI_ISL_2669286	EPI_SET_230103mu	Alpha	2021-05-31
hCoV-19/Denmark/DCGC-116151/2021	EPI_ISL_2669307	EPI_SET_230103mu	Alpha	2021-05-31
hCoV-19/Denmark/DCGC-116154/2021	EPI_ISL_2669310	EPI_SET_230103zt	Delta	2021-06-14
hCoV-19/Denmark/DCGC-116157/2021	EPI_ISL_3074896	EPI_SET_230103mu	Alpha	2021-05-31
hCoV-19/Denmark/DCGC-116166/2021	EPI_ISL_2669318	EPI_SET_230103mu	Alpha	2021-05-31
hCoV-19/Denmark/DCGC-116176/2021	EPI_ISL_2669325	EPI_SET_230103mu	Alpha	2021-06-14
hCoV-19/Denmark/DCGC-116179/2021	EPI_ISL_2669327	EPI_SET_230103mu	Alpha	2021-06-07
hCoV-19/Denmark/DCGC-116183/2021	EPI_ISL_2669331	EPI_SET_230103mu	Alpha	2021-06-07
hCoV-19/Denmark/DCGC-116190/2021	EPI_ISL_2669335	EPI_SET_230103mu	Alpha	2021-06-07
hCoV-19/Denmark/DCGC-116192/2021	EPI_ISL_3074901	EPI_SET_230103mu	Alpha	2021-06-07
hCoV-19/Denmark/DCGC-116204/2021	EPI_ISL_2669342	EPI_SET_230103mu	Alpha	2021-05-31
hCoV-19/Denmark/DCGC-116215/2021	EPI_ISL_2669351	EPI_SET_230103mu	Alpha	2021-05-31
hCoV-19/Denmark/DCGC-116219/2021	EPI_ISL_2669353	EPI_SET_230103mu	Alpha	2021-06-14
hCoV-19/Denmark/DCGC-116220/2021	EPI_ISL_2669354	EPI_SET_230103mu	Alpha	2021-06-07
hCoV-19/Denmark/DCGC-116226/2021	EPI_ISL_2669357	EPI_SET_230103mu	Alpha	2021-05-31
hCoV-19/Denmark/DCGC-116257/2021	EPI_ISL_2669379	EPI_SET_230103mu	Alpha	2021-06-14
hCoV-19/Denmark/DCGC-116262/2021	EPI_ISL_2669382	EPI_SET_230103mu	Alpha	2021-05-31
hCoV-19/Denmark/DCGC-116263/2021	EPI_ISL_2669383	EPI_SET_230103mu	Alpha	2021-06-07
hCoV-19/Denmark/DCGC-116264/2021	EPI_ISL_2669384	EPI_SET_230103mu	Alpha	2021-05-31
hCoV-19/Denmark/DCGC-116265/2021	EPI_ISL_2669385	EPI_SET_230103mu	Alpha	2021-05-31
hCoV-19/Denmark/DCGC-116267/2021	EPI_ISL_2669386	EPI_SET_230103mu	Alpha	2021-06-07
hCoV-19/Denmark/DCGC-116274/2021	EPI_ISL_2669391	EPI_SET_230103mu	Alpha	2021-06-07
hCoV-19/Denmark/DCGC-116286/2021	EPI_ISL_2669403	EPI_SET_230103mu	Alpha	2021-05-31
hCoV-19/Denmark/DCGC-116292/2021	EPI_ISL_3074911	EPI_SET_230103mu	Alpha	2021-05-31
hCoV-19/Denmark/DCGC-116294/2021	EPI_ISL_3074912	EPI_SET_230103mu	Alpha	2021-05-31
hCoV-19/Denmark/DCGC-116295/2021	EPI_ISL_2669409	EPI_SET_230103zt	Delta	2021-06-14
hCoV-19/Denmark/DCGC-116301/2021	EPI_ISL_2669413	EPI_SET_230103mu	Alpha	2021-05-31
hCoV-19/Denmark/DCGC-116309/2021	EPI_ISL_2669418	EPI_SET_230103mu	Alpha	2021-05-31
hCoV-19/Denmark/DCGC-116310/2021	EPI_ISL_3074914	EPI_SET_230103mu	Alpha	2021-05-31
hCoV-19/Denmark/DCGC-116317/2021	EPI_ISL_2669424	EPI_SET_230103mu	Alpha	2021-05-24
hCoV-19/Denmark/DCGC-116329/2021	EPI_ISL_2669434	EPI_SET_230103mu	Alpha	2021-05-31
hCoV-19/Denmark/DCGC-116330/2021	EPI_ISL_2669435	EPI_SET_230103mu	Alpha	2021-06-07
hCoV-19/Denmark/DCGC-116335/2021	EPI_ISL_3074916	EPI_SET_230103mu	Alpha	2021-05-31
hCoV-19/Denmark/DCGC-116345/2021	EPI_ISL_2669446	EPI_SET_230103mu	Alpha	2021-05-31
hCoV-19/Denmark/DCGC-116346/2021	EPI_ISL_3074919	EPI_SET_230103mu	Alpha	2021-06-07
hCoV-19/Denmark/DCGC-116347/2021	EPI_ISL_2669447	EPI_SET_230103mu	Alpha	2021-06-07
hCoV-19/Denmark/DCGC-116355/2021	EPI_ISL_3074921	EPI_SET_230103mu	Alpha	2021-05-31
hCoV-19/Denmark/DCGC-116357/2021	EPI_ISL_2669453	EPI_SET_230103mu	Alpha	2021-05-31
hCoV-19/Denmark/DCGC-116358/2021	EPI_ISL_2669454	EPI_SET_230103mu	Alpha	2021-05-31
hCoV-19/Denmark/DCGC-116368/2021	EPI_ISL_3074923	EPI_SET_230103mu	Alpha	2021-05-31
hCoV-19/Denmark/DCGC-116369/2021	EPI_ISL_3074924	EPI_SET_230103mu	Alpha	2021-05-31
hCoV-19/Denmark/DCGC-116376/2021	EPI_ISL_2669464	EPI_SET_230103mu	Alpha	2021-06-07
hCoV-19/Denmark/DCGC-116382/2021	EPI_ISL_2669466	EPI_SET_230103mu	Alpha	2021-06-07
hCoV-19/Denmark/DCGC-116395/2021	EPI_ISL_3074929	EPI_SET_230103mu	Alpha	2021-06-07
hCoV-19/Denmark/DCGC-116399/2021	EPI_ISL_2669477	EPI_SET_230103mu	Alpha	2021-05-31
hCoV-19/Denmark/DCGC-116407/2021	EPI_ISL_2669484	EPI_SET_230103mu	Alpha	2021-05-31
hCoV-19/Denmark/DCGC-116408/2021	EPI_ISL_2669485	EPI_SET_230103mu	Alpha	2021-06-07
hCoV-19/Denmark/DCGC-116415/2021	EPI_ISL_2669490	EPI_SET_230103mu	Alpha	2021-05-31
hCoV-19/Denmark/DCGC-116419/2021	EPI_ISL_2669494	EPI_SET_230103mu	Alpha	2021-05-31
hCoV-19/Denmark/DCGC-116422/2021	EPI_ISL_2669497	EPI_SET_230103mu	Alpha	2021-05-31
hCoV-19/Denmark/DCGC-116429/2021	EPI_ISL_2669500	EPI_SET_230103mu	Alpha	2021-05-31
hCoV-19/Denmark/DCGC-116430/2021	EPI_ISL_2669501	EPI_SET_230103mu	Alpha	2021-05-31
hCoV-19/Denmark/DCGC-116434/2021	EPI_ISL_2669504	EPI_SET_230103mu	Alpha	2021-06-07
hCoV-19/Denmark/DCGC-116438/2021	EPI_ISL_2669507	EPI_SET_230103mu	Alpha	2021-06-07
hCoV-19/Denmark/DCGC-116441/2021	EPI_ISL_2669509	EPI_SET_230103mu	Alpha	2021-06-07
hCoV-19/Denmark/DCGC-116445/2021	EPI_ISL_3074932	EPI_SET_230103mu	Alpha	2021-05-31
hCoV-19/Denmark/DCGC-116460/2021	EPI_ISL_2669522	EPI_SET_230103mu	Alpha	2021-05-31
hCoV-19/Denmark/DCGC-116466/2021	EPI_ISL_2669526	EPI_SET_230103mu	Alpha	2021-05-31
hCoV-19/Denmark/DCGC-116467/2021	EPI_ISL_2669527	EPI_SET_230103mu	Alpha	2021-05-31
hCoV-19/Denmark/DCGC-116468/2021	EPI_ISL_3074934	EPI_SET_230103mu	Alpha	2021-05-31
hCoV-19/Denmark/DCGC-116471/2021	EPI_ISL_3074935	EPI_SET_230103mu	Alpha	2021-05-31
hCoV-19/Denmark/DCGC-116472/2021	EPI_ISL_2669530	EPI_SET_230103mu	Alpha	2021-05-31
hCoV-19/Denmark/DCGC-116473/2021	EPI_ISL_2669531	EPI_SET_230103mu	Alpha	2021-05-31
hCoV-19/Denmark/DCGC-116474/2021	EPI_ISL_2669532	EPI_SET_230103mu	Alpha	2021-05-31
hCoV-19/Denmark/DCGC-116478/2021	EPI_ISL_3074937	EPI_SET_230103mu	Alpha	2021-06-07
hCoV-19/Denmark/DCGC-116482/2021	EPI_ISL_2669536	EPI_SET_230103mu	Alpha	2021-06-07
hCoV-19/Denmark/DCGC-116485/2021	EPI_ISL_2669538	EPI_SET_230103mu	Alpha	2021-05-31
hCoV-19/Denmark/DCGC-116490/2021	EPI_ISL_3074940	EPI_SET_230103mu	Alpha	2021-06-07
hCoV-19/Denmark/DCGC-116506/2021	EPI_ISL_2669551	EPI_SET_230103mu	Alpha	2021-05-31
hCoV-19/Denmark/DCGC-116510/2021	EPI_ISL_2669555	EPI_SET_230103mu	Alpha	2021-06-07
hCoV-19/Denmark/DCGC-116534/2021	EPI_ISL_3074945	EPI_SET_230103mu	Alpha	2021-06-07
hCoV-19/Denmark/DCGC-116535/2021	EPI_ISL_2669571	EPI_SET_230103mu	Alpha	2021-05-31
hCoV-19/Denmark/DCGC-116536/2021	EPI_ISL_2669572	EPI_SET_230103mu	Alpha	2021-05-31
hCoV-19/Denmark/DCGC-116541/2021	EPI_ISL_2669576	EPI_SET_230103mu	Alpha	2021-05-31
hCoV-19/Denmark/DCGC-116545/2021	EPI_ISL_2669580	EPI_SET_230103mu	Alpha	2021-05-31
hCoV-19/Denmark/DCGC-116553/2021	EPI_ISL_2669585	EPI_SET_230103mu	Alpha	2021-05-31
hCoV-19/Denmark/DCGC-116554/2021	EPI_ISL_2669586	EPI_SET_230103mu	Alpha	2021-05-31
hCoV-19/Denmark/DCGC-116555/2021	EPI_ISL_2669587	EPI_SET_230103mu	Alpha	2021-05-31
hCoV-19/Denmark/DCGC-116560/2021	EPI_ISL_2669591	EPI_SET_230103mu	Alpha	2021-05-31
hCoV-19/Denmark/DCGC-116568/2021	EPI_ISL_2669597	EPI_SET_230103mu	Alpha	2021-05-31
hCoV-19/Denmark/DCGC-116574/2021	EPI_ISL_2669601	EPI_SET_230103mu	Alpha	2021-05-31
hCoV-19/Denmark/DCGC-116581/2021	EPI_ISL_2669607	EPI_SET_230103mu	Alpha	2021-05-31
hCoV-19/Denmark/DCGC-116590/2021	EPI_ISL_2669613	EPI_SET_230103mu	Alpha	2021-05-31
hCoV-19/Denmark/DCGC-116591/2021	EPI_ISL_2669614	EPI_SET_230103zt	Delta	2021-06-07
hCoV-19/Denmark/DCGC-116595/2021	EPI_ISL_2669617	EPI_SET_230103mu	Alpha	2021-06-07
hCoV-19/Denmark/DCGC-116612/2021	EPI_ISL_2669629	EPI_SET_230103mu	Alpha	2021-05-31
hCoV-19/Denmark/DCGC-116615/2021	EPI_ISL_2669631	EPI_SET_230103mu	Alpha	2021-05-31
hCoV-19/Denmark/DCGC-116627/2021	EPI_ISL_2669642	EPI_SET_230103mu	Alpha	2021-05-31
hCoV-19/Denmark/DCGC-116629/2021	EPI_ISL_2669644	EPI_SET_230103mu	Alpha	2021-05-31
hCoV-19/Denmark/DCGC-116635/2021	EPI_ISL_3074958	EPI_SET_230103mu	Alpha	2021-05-31
hCoV-19/Denmark/DCGC-116641/2021	EPI_ISL_2669652	EPI_SET_230103mu	Alpha	2021-06-07
hCoV-19/Denmark/DCGC-116644/2021	EPI_ISL_2669655	EPI_SET_230103mu	Alpha	2021-05-31
hCoV-19/Denmark/DCGC-116646/2021	EPI_ISL_2669656	EPI_SET_230103mu	Alpha	2021-05-31
hCoV-19/Denmark/DCGC-116651/2021	EPI_ISL_2669659	EPI_SET_230103mu	Alpha	2021-05-31
hCoV-19/Denmark/DCGC-116656/2021	EPI_ISL_2669664	EPI_SET_230103mu	Alpha	2021-05-31
hCoV-19/Denmark/DCGC-116665/2021	EPI_ISL_3074963	EPI_SET_230103mu	Alpha	2021-06-07
hCoV-19/Denmark/DCGC-116667/2021	EPI_ISL_2669672	EPI_SET_230103mu	Alpha	2021-06-07
hCoV-19/Denmark/DCGC-116669/2021	EPI_ISL_2669674	EPI_SET_230103mu	Alpha	2021-05-31
hCoV-19/Denmark/DCGC-116672/2021	EPI_ISL_2669677	EPI_SET_230103mu	Alpha	2021-05-31
hCoV-19/Denmark/DCGC-116681/2021	EPI_ISL_3074965	EPI_SET_230103mu	Alpha	2021-05-31
hCoV-19/Denmark/DCGC-116682/2021	EPI_ISL_2669682	EPI_SET_230103mu	Alpha	2021-05-31
hCoV-19/Denmark/DCGC-116689/2021	EPI_ISL_2669688	EPI_SET_230103mu	Alpha	2021-05-31
hCoV-19/Denmark/DCGC-116692/2021	EPI_ISL_2669691	EPI_SET_230103mu	Alpha	2021-05-31
hCoV-19/Denmark/DCGC-116715/2021	EPI_ISL_3074970	EPI_SET_230103mu	Alpha	2021-05-31
hCoV-19/Denmark/DCGC-116723/2021	EPI_ISL_2669712	EPI_SET_230103mu	Alpha	2021-05-31
hCoV-19/Denmark/DCGC-116727/2021	EPI_ISL_2669715	EPI_SET_230103mu	Alpha	2021-06-14
hCoV-19/Denmark/DCGC-116728/2021	EPI_ISL_2669716	EPI_SET_230103mu	Alpha	2021-05-31
hCoV-19/Denmark/DCGC-116735/2021	EPI_ISL_3074971	EPI_SET_230103mu	Alpha	2021-05-31
hCoV-19/Denmark/DCGC-116739/2021	EPI_ISL_2669723	EPI_SET_230103mu	Alpha	2021-06-07
hCoV-19/Denmark/DCGC-116740/2021	EPI_ISL_2669724	EPI_SET_230103mu	Alpha	2021-06-07
hCoV-19/Denmark/DCGC-116743/2021	EPI_ISL_3074972	EPI_SET_230103mu	Alpha	2021-06-14
hCoV-19/Denmark/DCGC-116744/2021	EPI_ISL_4256895	EPI_SET_230103mu	Alpha	2021-06-14
hCoV-19/Denmark/DCGC-116751/2021	EPI_ISL_3074973	EPI_SET_230103mu	Alpha	2021-05-31
hCoV-19/Denmark/DCGC-116757/2021	EPI_ISL_2669736	EPI_SET_230103mu	Alpha	2021-06-07
hCoV-19/Denmark/DCGC-116759/2021	EPI_ISL_2669738	EPI_SET_230103mu	Alpha	2021-05-31
hCoV-19/Denmark/DCGC-116766/2021	EPI_ISL_2669742	EPI_SET_230103mu	Alpha	2021-05-31
hCoV-19/Denmark/DCGC-116767/2021	EPI_ISL_2669743	EPI_SET_230103mu	Alpha	2021-05-31
hCoV-19/Denmark/DCGC-116772/2021	EPI_ISL_2669746	EPI_SET_230103mu	Alpha	2021-05-31
hCoV-19/Denmark/DCGC-116781/2021	EPI_ISL_2669751	EPI_SET_230103mu	Alpha	2021-05-31
hCoV-19/Denmark/DCGC-116803/2021	EPI_ISL_3074979	EPI_SET_230103mu	Alpha	2021-05-31
hCoV-19/Denmark/DCGC-116805/2021	EPI_ISL_3074980	EPI_SET_230103mu	Alpha	2021-05-31
hCoV-19/Denmark/DCGC-116807/2021	EPI_ISL_3074981	EPI_SET_230103mu	Alpha	2021-06-07
hCoV-19/Denmark/DCGC-116814/2021	EPI_ISL_2669773	EPI_SET_230103mu	Alpha	2021-05-31
hCoV-19/Denmark/DCGC-116820/2021	EPI_ISL_2669778	EPI_SET_230103mu	Alpha	2021-06-07
hCoV-19/Denmark/DCGC-116821/2021	EPI_ISL_2669779	EPI_SET_230103mu	Alpha	2021-05-31
hCoV-19/Denmark/DCGC-116824/2021	EPI_ISL_2669780	EPI_SET_230103mu	Alpha	2021-05-31
hCoV-19/Denmark/DCGC-116827/2021	EPI_ISL_3074984	EPI_SET_230103mu	Alpha	2021-05-31
hCoV-19/Denmark/DCGC-116830/2021	EPI_ISL_3074985	EPI_SET_230103mu	Alpha	2021-05-31
hCoV-19/Denmark/DCGC-116832/2021	EPI_ISL_2669784	EPI_SET_230103mu	Alpha	2021-05-31
hCoV-19/Denmark/DCGC-116848/2021	EPI_ISL_2669796	EPI_SET_230103mu	Alpha	2021-06-07
hCoV-19/Denmark/DCGC-116857/2021	EPI_ISL_3074986	EPI_SET_230103mu	Alpha	2021-06-14
hCoV-19/Denmark/DCGC-116865/2021	EPI_ISL_2669807	EPI_SET_230103mu	Alpha	2021-05-31
hCoV-19/Denmark/DCGC-116878/2021	EPI_ISL_3074991	EPI_SET_230103mu	Alpha	2021-05-31
hCoV-19/Denmark/DCGC-116883/2021	EPI_ISL_2669819	EPI_SET_230103mu	Alpha	2021-05-31
hCoV-19/Denmark/DCGC-116886/2021	EPI_ISL_2669821	EPI_SET_230103mu	Alpha	2021-05-31
hCoV-19/Denmark/DCGC-116888/2021	EPI_ISL_2669823	EPI_SET_230103mu	Alpha	2021-05-31
hCoV-19/Denmark/DCGC-116890/2021	EPI_ISL_2669824	EPI_SET_230103mu	Alpha	2021-06-07
hCoV-19/Denmark/DCGC-116895/2021	EPI_ISL_3074995	EPI_SET_230103mu	Alpha	2021-05-31
hCoV-19/Denmark/DCGC-116897/2021	EPI_ISL_3074996	EPI_SET_230103mu	Alpha	2021-05-31
hCoV-19/Denmark/DCGC-116900/2021	EPI_ISL_2669827	EPI_SET_230103mu	Alpha	2021-06-07
hCoV-19/Denmark/DCGC-116901/2021	EPI_ISL_2669828	EPI_SET_230103mu	Alpha	2021-05-31
hCoV-19/Denmark/DCGC-116913/2021	EPI_ISL_3074999	EPI_SET_230103mu	Alpha	2021-05-31
hCoV-19/Denmark/DCGC-116914/2021	EPI_ISL_2669836	EPI_SET_230103mu	Alpha	2021-05-31
hCoV-19/Denmark/DCGC-116916/2021	EPI_ISL_2669838	EPI_SET_230103mu	Alpha	2021-05-31
hCoV-19/Denmark/DCGC-116919/2021	EPI_ISL_2669841	EPI_SET_230103mu	Alpha	2021-05-31
hCoV-19/Denmark/DCGC-116924/2021	EPI_ISL_3075000	EPI_SET_230103mu	Alpha	2021-06-07
hCoV-19/Denmark/DCGC-116926/2021	EPI_ISL_2669846	EPI_SET_230103mu	Alpha	2021-05-31
hCoV-19/Denmark/DCGC-116930/2021	EPI_ISL_2669848	EPI_SET_230103mu	Alpha	2021-05-31
hCoV-19/Denmark/DCGC-116934/2021	EPI_ISL_2669851	EPI_SET_230103mu	Alpha	2021-05-31
hCoV-19/Denmark/DCGC-116938/2021	EPI_ISL_2669854	EPI_SET_230103mu	Alpha	2021-05-31
hCoV-19/Denmark/DCGC-116942/2021	EPI_ISL_2669856	EPI_SET_230103mu	Alpha	2021-06-07
hCoV-19/Denmark/DCGC-116952/2021	EPI_ISL_2669862	EPI_SET_230103mu	Alpha	2021-05-31
hCoV-19/Denmark/DCGC-116960/2021	EPI_ISL_2669869	EPI_SET_230103mu	Alpha	2021-06-07
hCoV-19/Denmark/DCGC-116962/2021	EPI_ISL_3075007	EPI_SET_230103mu	Alpha	2021-05-31
hCoV-19/Denmark/DCGC-116963/2021	EPI_ISL_3075008	EPI_SET_230103mu	Alpha	2021-05-31
hCoV-19/Denmark/DCGC-116972/2021	EPI_ISL_2669875	EPI_SET_230103mu	Alpha	2021-05-31
hCoV-19/Denmark/DCGC-116973/2021	EPI_ISL_3075009	EPI_SET_230103mu	Alpha	2021-06-07
hCoV-19/Denmark/DCGC-116979/2021	EPI_ISL_2669881	EPI_SET_230103mu	Alpha	2021-05-31
hCoV-19/Denmark/DCGC-116983/2021	EPI_ISL_2669884	EPI_SET_230103mu	Alpha	2021-06-14
hCoV-19/Denmark/DCGC-116991/2021	EPI_ISL_3075010	EPI_SET_230103mu	Alpha	2021-05-31
hCoV-19/Denmark/DCGC-116992/2021	EPI_ISL_3075011	EPI_SET_230103mu	Alpha	2021-06-07
hCoV-19/Denmark/DCGC-116996/2021	EPI_ISL_2669894	EPI_SET_230103mu	Alpha	2021-05-31
hCoV-19/Denmark/DCGC-117000/2021	EPI_ISL_2669898	EPI_SET_230103mu	Alpha	2021-05-31
hCoV-19/Denmark/DCGC-117013/2021	EPI_ISL_2669909	EPI_SET_230103mu	Alpha	2021-06-07
hCoV-19/Denmark/DCGC-117016/2021	EPI_ISL_3075013	EPI_SET_230103mu	Alpha	2021-06-07
hCoV-19/Denmark/DCGC-117046/2021	EPI_ISL_3075018	EPI_SET_230103mu	Alpha	2021-06-07
hCoV-19/Denmark/DCGC-117048/2021	EPI_ISL_2669934	EPI_SET_230103mu	Alpha	2021-05-31
hCoV-19/Denmark/DCGC-117050/2021	EPI_ISL_2669935	EPI_SET_230103mu	Alpha	2021-06-07
hCoV-19/Denmark/DCGC-117054/2021	EPI_ISL_2669938	EPI_SET_230103mu	Alpha	2021-06-07
hCoV-19/Denmark/DCGC-117061/2021	EPI_ISL_2669943	EPI_SET_230103mu	Alpha	2021-06-07
hCoV-19/Denmark/DCGC-117062/2021	EPI_ISL_2669944	EPI_SET_230103mu	Alpha	2021-05-31
hCoV-19/Denmark/DCGC-117063/2021	EPI_ISL_3075021	EPI_SET_230103mu	Alpha	2021-05-31
hCoV-19/Denmark/DCGC-117074/2021	EPI_ISL_2669952	EPI_SET_230103mu	Alpha	2021-06-07
hCoV-19/Denmark/DCGC-117077/2021	EPI_ISL_2669955	EPI_SET_230103mu	Alpha	2021-05-31
hCoV-19/Denmark/DCGC-117080/2021	EPI_ISL_2669957	EPI_SET_230103mu	Alpha	2021-05-31
hCoV-19/Denmark/DCGC-117081/2021	EPI_ISL_2669958	EPI_SET_230103mu	Alpha	2021-05-31
hCoV-19/Denmark/DCGC-117083/2021	EPI_ISL_2669960	EPI_SET_230103mu	Alpha	2021-06-07
hCoV-19/Denmark/DCGC-117094/2021	EPI_ISL_2669968	EPI_SET_230103mu	Alpha	2021-05-31
hCoV-19/Denmark/DCGC-117106/2021	EPI_ISL_2669977	EPI_SET_230103mu	Alpha	2021-05-31
hCoV-19/Denmark/DCGC-117111/2021	EPI_ISL_2669981	EPI_SET_230103mu	Alpha	2021-05-31
hCoV-19/Denmark/DCGC-117125/2021	EPI_ISL_3075025	EPI_SET_230103mu	Alpha	2021-06-07
hCoV-19/Denmark/DCGC-117129/2021	EPI_ISL_2669993	EPI_SET_230103mu	Alpha	2021-06-07
hCoV-19/Denmark/DCGC-117136/2021	EPI_ISL_2669998	EPI_SET_230103mu	Alpha	2021-05-31
hCoV-19/Denmark/DCGC-117139/2021	EPI_ISL_3075029	EPI_SET_230103mu	Alpha	2021-06-07
hCoV-19/Denmark/DCGC-117143/2021	EPI_ISL_2670002	EPI_SET_230103mu	Alpha	2021-05-31
hCoV-19/Denmark/DCGC-117150/2021	EPI_ISL_3075033	EPI_SET_230103mu	Alpha	2021-05-31
hCoV-19/Denmark/DCGC-117163/2021	EPI_ISL_3075036	EPI_SET_230103mu	Alpha	2021-05-31
hCoV-19/Denmark/DCGC-117168/2021	EPI_ISL_2670013	EPI_SET_230103mu	Alpha	2021-06-07
hCoV-19/Denmark/DCGC-117182/2021	EPI_ISL_3075039	EPI_SET_230103mu	Alpha	2021-06-14
hCoV-19/Denmark/DCGC-117193/2021	EPI_ISL_3075040	EPI_SET_230103mu	Alpha	2021-05-31
hCoV-19/Denmark/DCGC-117199/2021	EPI_ISL_3075042	EPI_SET_230103mu	Alpha	2021-05-31
hCoV-19/Denmark/DCGC-117203/2021	EPI_ISL_2670037	EPI_SET_230103mu	Alpha	2021-05-31
hCoV-19/Denmark/DCGC-117211/2021	EPI_ISL_2670040	EPI_SET_230103mu	Alpha	2021-05-31
hCoV-19/Denmark/DCGC-117219/2021	EPI_ISL_3075044	EPI_SET_230103mu	Alpha	2021-06-07
hCoV-19/Denmark/DCGC-117222/2021	EPI_ISL_2670047	EPI_SET_230103mu	Alpha	2021-05-31
hCoV-19/Denmark/DCGC-117228/2021	EPI_ISL_2670052	EPI_SET_230103mu	Alpha	2021-05-31
hCoV-19/Denmark/DCGC-117237/2021	EPI_ISL_3075046	EPI_SET_230103mu	Alpha	2021-06-07
hCoV-19/Denmark/DCGC-117241/2021	EPI_ISL_2670063	EPI_SET_230103mu	Alpha	2021-06-07
hCoV-19/Denmark/DCGC-117244/2021	EPI_ISL_2670065	EPI_SET_230103mu	Alpha	2021-05-31
hCoV-19/Denmark/DCGC-117248/2021	EPI_ISL_2670068	EPI_SET_230103mu	Alpha	2021-05-31
hCoV-19/Denmark/DCGC-117250/2021	EPI_ISL_2670070	EPI_SET_230103mu	Alpha	2021-05-31
hCoV-19/Denmark/DCGC-117254/2021	EPI_ISL_2670072	EPI_SET_230103mu	Alpha	2021-05-31
hCoV-19/Denmark/DCGC-117256/2021	EPI_ISL_2670074	EPI_SET_230103mu	Alpha	2021-06-07
hCoV-19/Denmark/DCGC-117257/2021	EPI_ISL_2670075	EPI_SET_230103mu	Alpha	2021-05-31
hCoV-19/Denmark/DCGC-117289/2021	EPI_ISL_3075053	EPI_SET_230103mu	Alpha	2021-05-31
hCoV-19/Denmark/DCGC-117292/2021	EPI_ISL_3075055	EPI_SET_230103mu	Alpha	2021-05-31
hCoV-19/Denmark/DCGC-117295/2021	EPI_ISL_2670098	EPI_SET_230103mu	Alpha	2021-05-31
hCoV-19/Denmark/DCGC-117297/2021	EPI_ISL_2670099	EPI_SET_230103mu	Alpha	2021-06-07
hCoV-19/Denmark/DCGC-117300/2021	EPI_ISL_2670101	EPI_SET_230103mu	Alpha	2021-06-07
hCoV-19/Denmark/DCGC-117303/2021	EPI_ISL_2670104	EPI_SET_230103mu	Alpha	2021-05-31
hCoV-19/Denmark/DCGC-117314/2021	EPI_ISL_2670111	EPI_SET_230103mu	Alpha	2021-05-31
hCoV-19/Denmark/DCGC-117319/2021	EPI_ISL_2670116	EPI_SET_230103mu	Alpha	2021-05-31
hCoV-19/Denmark/DCGC-117320/2021	EPI_ISL_2670117	EPI_SET_230103mu	Alpha	2021-05-31
hCoV-19/Denmark/DCGC-117330/2021	EPI_ISL_2670124	EPI_SET_230103mu	Alpha	2021-05-31
hCoV-19/Denmark/DCGC-117337/2021	EPI_ISL_3075059	EPI_SET_230103mu	Alpha	2021-06-07
hCoV-19/Denmark/DCGC-117338/2021	EPI_ISL_2670131	EPI_SET_230103mu	Alpha	2021-05-31
hCoV-19/Denmark/DCGC-117339/2021	EPI_ISL_3075060	EPI_SET_230103mu	Alpha	2021-06-07
hCoV-19/Denmark/DCGC-117342/2021	EPI_ISL_3075061	EPI_SET_230103mu	Alpha	2021-06-07
hCoV-19/Denmark/DCGC-117353/2021	EPI_ISL_2670140	EPI_SET_230103mu	Alpha	2021-05-31
hCoV-19/Denmark/DCGC-117354/2021	EPI_ISL_2670141	EPI_SET_230103mu	Alpha	2021-05-31
hCoV-19/Denmark/DCGC-117366/2021	EPI_ISL_3075064	EPI_SET_230103mu	Alpha	2021-06-14
hCoV-19/Denmark/DCGC-117370/2021	EPI_ISL_2670152	EPI_SET_230103mu	Alpha	2021-05-31
hCoV-19/Denmark/DCGC-117377/2021	EPI_ISL_2670155	EPI_SET_230103mu	Alpha	2021-06-07
hCoV-19/Denmark/DCGC-117378/2021	EPI_ISL_3075066	EPI_SET_230103mu	Alpha	2021-05-31
hCoV-19/Denmark/DCGC-117400/2021	EPI_ISL_2670174	EPI_SET_230103mu	Alpha	2021-05-31
hCoV-19/Denmark/DCGC-117408/2021	EPI_ISL_2670181	EPI_SET_230103mu	Alpha	2021-05-31
hCoV-19/Denmark/DCGC-117409/2021	EPI_ISL_3075068	EPI_SET_230103mu	Alpha	2021-05-31
hCoV-19/Denmark/DCGC-117410/2021	EPI_ISL_3075069	EPI_SET_230103mu	Alpha	2021-05-31
hCoV-19/Denmark/DCGC-117412/2021	EPI_ISL_2670182	EPI_SET_230103mu	Alpha	2021-05-31
hCoV-19/Denmark/DCGC-117428/2021	EPI_ISL_2670192	EPI_SET_230103mu	Alpha	2021-05-31
hCoV-19/Denmark/DCGC-117432/2021	EPI_ISL_2670195	EPI_SET_230103mu	Alpha	2021-05-31
hCoV-19/Denmark/DCGC-117441/2021	EPI_ISL_3075072	EPI_SET_230103mu	Alpha	2021-06-07
hCoV-19/Denmark/DCGC-117464/2021	EPI_ISL_2670220	EPI_SET_230103mu	Alpha	2021-05-31
hCoV-19/Denmark/DCGC-117466/2021	EPI_ISL_2670222	EPI_SET_230103mu	Alpha	2021-06-07
hCoV-19/Denmark/DCGC-117468/2021	EPI_ISL_2670224	EPI_SET_230103mu	Alpha	2021-05-31
hCoV-19/Denmark/DCGC-117470/2021	EPI_ISL_2670225	EPI_SET_230103mu	Alpha	2021-05-31
hCoV-19/Denmark/DCGC-117483/2021	EPI_ISL_3075079	EPI_SET_230103mu	Alpha	2021-06-07
hCoV-19/Denmark/DCGC-117486/2021	EPI_ISL_3075080	EPI_SET_230103mu	Alpha	2021-06-07
hCoV-19/Denmark/DCGC-117499/2021	EPI_ISL_2670245	EPI_SET_230103mu	Alpha	2021-05-31
hCoV-19/Denmark/DCGC-117500/2021	EPI_ISL_2670246	EPI_SET_230103mu	Alpha	2021-06-07
hCoV-19/Denmark/DCGC-117517/2021	EPI_ISL_2670255	EPI_SET_230103mu	Alpha	2021-06-07
hCoV-19/Denmark/DCGC-117524/2021	EPI_ISL_3075088	EPI_SET_230103mu	Alpha	2021-05-31
hCoV-19/Denmark/DCGC-117546/2021	EPI_ISL_2670273	EPI_SET_230103mu	Alpha	2021-06-07
hCoV-19/Denmark/DCGC-117547/2021	EPI_ISL_2670274	EPI_SET_230103mu	Alpha	2021-05-31
hCoV-19/Denmark/DCGC-117549/2021	EPI_ISL_2670276	EPI_SET_230103mu	Alpha	2021-06-07
hCoV-19/Denmark/DCGC-117552/2021	EPI_ISL_2670279	EPI_SET_230103mu	Alpha	2021-06-07
hCoV-19/Denmark/DCGC-117565/2021	EPI_ISL_2670290	EPI_SET_230103mu	Alpha	2021-05-31
hCoV-19/Denmark/DCGC-117576/2021	EPI_ISL_3075093	EPI_SET_230103mu	Alpha	2021-05-31
hCoV-19/Denmark/DCGC-117581/2021	EPI_ISL_2670301	EPI_SET_230103mu	Alpha	2021-05-31
hCoV-19/Denmark/DCGC-117590/2021	EPI_ISL_2670306	EPI_SET_230103mu	Alpha	2021-05-31
hCoV-19/Denmark/DCGC-117592/2021	EPI_ISL_3075095	EPI_SET_230103mu	Alpha	2021-05-31
hCoV-19/Denmark/DCGC-117597/2021	EPI_ISL_2670310	EPI_SET_230103mu	Alpha	2021-05-31
hCoV-19/Denmark/DCGC-117599/2021	EPI_ISL_2670312	EPI_SET_230103mu	Alpha	2021-05-31
hCoV-19/Denmark/DCGC-117600/2021	EPI_ISL_2670313	EPI_SET_230103mu	Alpha	2021-05-31
hCoV-19/Denmark/DCGC-117602/2021	EPI_ISL_2670314	EPI_SET_230103mu	Alpha	2021-05-31
hCoV-19/Denmark/DCGC-117603/2021	EPI_ISL_2670315	EPI_SET_230103mu	Alpha	2021-05-31
hCoV-19/Denmark/DCGC-117608/2021	EPI_ISL_2670320	EPI_SET_230103mu	Alpha	2021-06-07
hCoV-19/Denmark/DCGC-117612/2021	EPI_ISL_3075096	EPI_SET_230103mu	Alpha	2021-05-31
hCoV-19/Denmark/DCGC-117614/2021	EPI_ISL_2670324	EPI_SET_230103mu	Alpha	2021-05-31
hCoV-19/Denmark/DCGC-117625/2021	EPI_ISL_2670332	EPI_SET_230103mu	Alpha	2021-06-07
hCoV-19/Denmark/DCGC-117626/2021	EPI_ISL_3075100	EPI_SET_230103mu	Alpha	2021-05-31
hCoV-19/Denmark/DCGC-117629/2021	EPI_ISL_2670335	EPI_SET_230103mu	Alpha	2021-05-31
hCoV-19/Denmark/DCGC-117641/2021	EPI_ISL_2670343	EPI_SET_230103mu	Alpha	2021-05-31
hCoV-19/Denmark/DCGC-117645/2021	EPI_ISL_2670347	EPI_SET_230103mu	Alpha	2021-06-07
hCoV-19/Denmark/DCGC-117653/2021	EPI_ISL_2670353	EPI_SET_230103mu	Alpha	2021-05-31
hCoV-19/Denmark/DCGC-117656/2021	EPI_ISL_3075101	EPI_SET_230103mu	Alpha	2021-06-07
hCoV-19/Denmark/DCGC-117662/2021	EPI_ISL_2670361	EPI_SET_230103mu	Alpha	2021-05-31
hCoV-19/Denmark/DCGC-117664/2021	EPI_ISL_2670362	EPI_SET_230103mu	Alpha	2021-06-07
hCoV-19/Denmark/DCGC-117665/2021	EPI_ISL_2670363	EPI_SET_230103mu	Alpha	2021-05-31
hCoV-19/Denmark/DCGC-117674/2021	EPI_ISL_2670369	EPI_SET_230103mu	Alpha	2021-05-31
hCoV-19/Denmark/DCGC-117675/2021	EPI_ISL_2670370	EPI_SET_230103mu	Alpha	2021-05-31
hCoV-19/Denmark/DCGC-117677/2021	EPI_ISL_3075103	EPI_SET_230103mu	Alpha	2021-06-07
hCoV-19/Denmark/DCGC-117680/2021	EPI_ISL_3075104	EPI_SET_230103mu	Alpha	2021-06-07
hCoV-19/Denmark/DCGC-117681/2021	EPI_ISL_2670374	EPI_SET_230103mu	Alpha	2021-06-07
hCoV-19/Denmark/DCGC-117685/2021	EPI_ISL_2670377	EPI_SET_230103mu	Alpha	2021-05-31
hCoV-19/Denmark/DCGC-117689/2021	EPI_ISL_2670379	EPI_SET_230103mu	Alpha	2021-05-31
hCoV-19/Denmark/DCGC-117693/2021	EPI_ISL_2670382	EPI_SET_230103mu	Alpha	2021-05-31
hCoV-19/Denmark/DCGC-117694/2021	EPI_ISL_2670383	EPI_SET_230103mu	Alpha	2021-05-31
hCoV-19/Denmark/DCGC-117695/2021	EPI_ISL_2670384	EPI_SET_230103mu	Alpha	2021-05-31
hCoV-19/Denmark/DCGC-117702/2021	EPI_ISL_3075107	EPI_SET_230103mu	Alpha	2021-05-31
hCoV-19/Denmark/DCGC-117703/2021	EPI_ISL_3075108	EPI_SET_230103mu	Alpha	2021-05-24
hCoV-19/Denmark/DCGC-117714/2021	EPI_ISL_3075111	EPI_SET_230103mu	Alpha	2021-06-07
hCoV-19/Denmark/DCGC-117721/2021	EPI_ISL_3075112	EPI_SET_230103mu	Alpha	2021-05-31
hCoV-19/Denmark/DCGC-117729/2021	EPI_ISL_2670404	EPI_SET_230103mu	Alpha	2021-05-31
hCoV-19/Denmark/DCGC-117730/2021	EPI_ISL_2670405	EPI_SET_230103mu	Alpha	2021-06-07
hCoV-19/Denmark/DCGC-117732/2021	EPI_ISL_3075114	EPI_SET_230103mu	Alpha	2021-05-31
hCoV-19/Denmark/DCGC-117735/2021	EPI_ISL_2670408	EPI_SET_230103mu	Alpha	2021-05-31
hCoV-19/Denmark/DCGC-117737/2021	EPI_ISL_2670410	EPI_SET_230103mu	Alpha	2021-05-31
hCoV-19/Denmark/DCGC-117751/2021	EPI_ISL_2670422	EPI_SET_230103mu	Alpha	2021-05-31
hCoV-19/Denmark/DCGC-117759/2021	EPI_ISL_3075115	EPI_SET_230103mu	Alpha	2021-05-31
hCoV-19/Denmark/DCGC-117763/2021	EPI_ISL_2670432	EPI_SET_230103mu	Alpha	2021-05-31
hCoV-19/Denmark/DCGC-117769/2021	EPI_ISL_2670437	EPI_SET_230103mu	Alpha	2021-05-31
hCoV-19/Denmark/DCGC-117770/2021	EPI_ISL_2670438	EPI_SET_230103mu	Alpha	2021-05-31
hCoV-19/Denmark/DCGC-117775/2021	EPI_ISL_2670442	EPI_SET_230103mu	Alpha	2021-05-31
hCoV-19/Denmark/DCGC-117790/2021	EPI_ISL_2670452	EPI_SET_230103mu	Alpha	2021-05-31
hCoV-19/Denmark/DCGC-117792/2021	EPI_ISL_3075117	EPI_SET_230103mu	Alpha	2021-06-07
hCoV-19/Denmark/DCGC-117797/2021	EPI_ISL_2670457	EPI_SET_230103mu	Alpha	2021-06-07
hCoV-19/Denmark/DCGC-117804/2021	EPI_ISL_3075119	EPI_SET_230103mu	Alpha	2021-05-31
hCoV-19/Denmark/DCGC-117805/2021	EPI_ISL_2670463	EPI_SET_230103mu	Alpha	2021-05-31
hCoV-19/Denmark/DCGC-117808/2021	EPI_ISL_2670465	EPI_SET_230103mu	Alpha	2021-05-31
hCoV-19/Denmark/DCGC-117814/2021	EPI_ISL_3075120	EPI_SET_230103mu	Alpha	2021-05-31
hCoV-19/Denmark/DCGC-117815/2021	EPI_ISL_2670471	EPI_SET_230103mu	Alpha	2021-05-31
hCoV-19/Denmark/DCGC-117820/2021	EPI_ISL_2670475	EPI_SET_230103mu	Alpha	2021-05-31
hCoV-19/Denmark/DCGC-117821/2021	EPI_ISL_2670476	EPI_SET_230103mu	Alpha	2021-05-31
hCoV-19/Denmark/DCGC-117822/2021	EPI_ISL_3075121	EPI_SET_230103mu	Alpha	2021-06-07
hCoV-19/Denmark/DCGC-117826/2021	EPI_ISL_2670478	EPI_SET_230103mu	Alpha	2021-06-07
hCoV-19/Denmark/DCGC-117840/2021	EPI_ISL_2670488	EPI_SET_230103mu	Alpha	2021-05-31
hCoV-19/Denmark/DCGC-117852/2021	EPI_ISL_3075127	EPI_SET_230103mu	Alpha	2021-06-07
hCoV-19/Denmark/DCGC-117860/2021	EPI_ISL_3075128	EPI_SET_230103mu	Alpha	2021-06-14
hCoV-19/Denmark/DCGC-117863/2021	EPI_ISL_2670506	EPI_SET_230103mu	Alpha	2021-05-31
hCoV-19/Denmark/DCGC-117866/2021	EPI_ISL_2670509	EPI_SET_230103mu	Alpha	2021-05-31
hCoV-19/Denmark/DCGC-117878/2021	EPI_ISL_3075131	EPI_SET_230103mu	Alpha	2021-06-07
hCoV-19/Denmark/DCGC-117879/2021	EPI_ISL_2670517	EPI_SET_230103mu	Alpha	2021-05-31
hCoV-19/Denmark/DCGC-117892/2021	EPI_ISL_3075133	EPI_SET_230103mu	Alpha	2021-05-31
hCoV-19/Denmark/DCGC-117894/2021	EPI_ISL_2670530	EPI_SET_230103mu	Alpha	2021-05-31
hCoV-19/Denmark/DCGC-117905/2021	EPI_ISL_2670541	EPI_SET_230103mu	Alpha	2021-05-31
hCoV-19/Denmark/DCGC-117907/2021	EPI_ISL_3075134	EPI_SET_230103mu	Alpha	2021-05-31
hCoV-19/Denmark/DCGC-117918/2021	EPI_ISL_2670549	EPI_SET_230103mu	Alpha	2021-05-31
hCoV-19/Denmark/DCGC-117929/2021	EPI_ISL_2670559	EPI_SET_230103mu	Alpha	2021-05-31
hCoV-19/Denmark/DCGC-117951/2021	EPI_ISL_2670576	EPI_SET_230103mu	Alpha	2021-05-31
hCoV-19/Denmark/DCGC-117956/2021	EPI_ISL_2670581	EPI_SET_230103mu	Alpha	2021-05-31
hCoV-19/Denmark/DCGC-117960/2021	EPI_ISL_2670585	EPI_SET_230103mu	Alpha	2021-05-31
hCoV-19/Denmark/DCGC-117963/2021	EPI_ISL_3075139	EPI_SET_230103mu	Alpha	2021-05-31
hCoV-19/Denmark/DCGC-117965/2021	EPI_ISL_2670587	EPI_SET_230103mu	Alpha	2021-05-31
hCoV-19/Denmark/DCGC-117968/2021	EPI_ISL_2670589	EPI_SET_230103mu	Alpha	2021-05-31
hCoV-19/Denmark/DCGC-117969/2021	EPI_ISL_3075141	EPI_SET_230103mu	Alpha	2021-06-07
hCoV-19/Denmark/DCGC-117978/2021	EPI_ISL_3075143	EPI_SET_230103mu	Alpha	2021-05-31
hCoV-19/Denmark/DCGC-117990/2021	EPI_ISL_2670602	EPI_SET_230103mu	Alpha	2021-05-31
hCoV-19/Denmark/DCGC-117996/2021	EPI_ISL_2670605	EPI_SET_230103mu	Alpha	2021-05-31
hCoV-19/Denmark/DCGC-117997/2021	EPI_ISL_2670606	EPI_SET_230103mu	Alpha	2021-05-31
hCoV-19/Denmark/DCGC-118003/2021	EPI_ISL_2670610	EPI_SET_230103mu	Alpha	2021-05-31
hCoV-19/Denmark/DCGC-118004/2021	EPI_ISL_3075149	EPI_SET_230103mu	Alpha	2021-06-07
hCoV-19/Denmark/DCGC-118016/2021	EPI_ISL_2670619	EPI_SET_230103mu	Alpha	2021-05-31
hCoV-19/Denmark/DCGC-118017/2021	EPI_ISL_3075151	EPI_SET_230103mu	Alpha	2021-05-31
hCoV-19/Denmark/DCGC-118020/2021	EPI_ISL_3075152	EPI_SET_230103mu	Alpha	2021-05-31
hCoV-19/Denmark/DCGC-118027/2021	EPI_ISL_3075153	EPI_SET_230103mu	Alpha	2021-05-31
hCoV-19/Denmark/DCGC-118029/2021	EPI_ISL_2670627	EPI_SET_230103mu	Alpha	2021-05-31
hCoV-19/Denmark/DCGC-118031/2021	EPI_ISL_2670629	EPI_SET_230103mu	Alpha	2021-06-07
hCoV-19/Denmark/DCGC-118044/2021	EPI_ISL_2670634	EPI_SET_230103mu	Alpha	2021-06-07
hCoV-19/Denmark/DCGC-118057/2021	EPI_ISL_2670641	EPI_SET_230103mu	Alpha	2021-05-31
hCoV-19/Denmark/DCGC-118058/2021	EPI_ISL_2670642	EPI_SET_230103mu	Alpha	2021-06-07
hCoV-19/Denmark/DCGC-118060/2021	EPI_ISL_2670644	EPI_SET_230103mu	Alpha	2021-06-07
hCoV-19/Denmark/DCGC-118062/2021	EPI_ISL_2670646	EPI_SET_230103mu	Alpha	2021-05-31
hCoV-19/Denmark/DCGC-118074/2021	EPI_ISL_3075160	EPI_SET_230103mu	Alpha	2021-06-07
hCoV-19/Denmark/DCGC-118092/2021	EPI_ISL_2670669	EPI_SET_230103mu	Alpha	2021-05-31
hCoV-19/Denmark/DCGC-118105/2021	EPI_ISL_3075164	EPI_SET_230103mu	Alpha	2021-05-31
hCoV-19/Denmark/DCGC-118108/2021	EPI_ISL_2670678	EPI_SET_230103mu	Alpha	2021-06-07
hCoV-19/Denmark/DCGC-118114/2021	EPI_ISL_3075166	EPI_SET_230103mu	Alpha	2021-05-31
hCoV-19/Denmark/DCGC-118117/2021	EPI_ISL_2670684	EPI_SET_230103mu	Alpha	2021-05-31
hCoV-19/Denmark/DCGC-118128/2021	EPI_ISL_2670691	EPI_SET_230103mu	Alpha	2021-05-31
hCoV-19/Denmark/DCGC-118138/2021	EPI_ISL_2670700	EPI_SET_230103mu	Alpha	2021-06-14
hCoV-19/Denmark/DCGC-118140/2021	EPI_ISL_3075169	EPI_SET_230103mu	Alpha	2021-05-31
hCoV-19/Denmark/DCGC-118154/2021	EPI_ISL_2670713	EPI_SET_230103mu	Alpha	2021-05-31
hCoV-19/Denmark/DCGC-118155/2021	EPI_ISL_2670714	EPI_SET_230103mu	Alpha	2021-05-31
hCoV-19/Denmark/DCGC-118157/2021	EPI_ISL_3075171	EPI_SET_230103mu	Alpha	2021-05-31
hCoV-19/Denmark/DCGC-118166/2021	EPI_ISL_2670721	EPI_SET_230103mu	Alpha	2021-05-31
hCoV-19/Denmark/DCGC-118167/2021	EPI_ISL_2670722	EPI_SET_230103mu	Alpha	2021-06-14
hCoV-19/Denmark/DCGC-118168/2021	EPI_ISL_2670723	EPI_SET_230103mu	Alpha	2021-05-31
hCoV-19/Denmark/DCGC-118169/2021	EPI_ISL_2670724	EPI_SET_230103mu	Alpha	2021-06-07
hCoV-19/Denmark/DCGC-118183/2021	EPI_ISL_3075175	EPI_SET_230103mu	Alpha	2021-05-31
hCoV-19/Denmark/DCGC-118184/2021	EPI_ISL_2670732	EPI_SET_230103mu	Alpha	2021-06-07
hCoV-19/Denmark/DCGC-118187/2021	EPI_ISL_3075176	EPI_SET_230103mu	Alpha	2021-05-31
hCoV-19/Denmark/DCGC-118195/2021	EPI_ISL_2670740	EPI_SET_230103mu	Alpha	2021-06-07
hCoV-19/Denmark/DCGC-118199/2021	EPI_ISL_2670744	EPI_SET_230103mu	Alpha	2021-06-07
hCoV-19/Denmark/DCGC-118200/2021	EPI_ISL_2670745	EPI_SET_230103mu	Alpha	2021-05-31
hCoV-19/Denmark/DCGC-118204/2021	EPI_ISL_2670748	EPI_SET_230103mu	Alpha	2021-05-31
hCoV-19/Denmark/DCGC-118207/2021	EPI_ISL_3075179	EPI_SET_230103mu	Alpha	2021-06-07
hCoV-19/Denmark/DCGC-118210/2021	EPI_ISL_2670752	EPI_SET_230103mu	Alpha	2021-05-24
hCoV-19/Denmark/DCGC-118212/2021	EPI_ISL_2670753	EPI_SET_230103mu	Alpha	2021-06-07
hCoV-19/Denmark/DCGC-118216/2021	EPI_ISL_2670756	EPI_SET_230103mu	Alpha	2021-06-07
hCoV-19/Denmark/DCGC-118219/2021	EPI_ISL_3075181	EPI_SET_230103mu	Alpha	2021-06-07
hCoV-19/Denmark/DCGC-118223/2021	EPI_ISL_2670761	EPI_SET_230103mu	Alpha	2021-06-14
hCoV-19/Denmark/DCGC-118231/2021	EPI_ISL_2670768	EPI_SET_230103mu	Alpha	2021-05-31
hCoV-19/Denmark/DCGC-118235/2021	EPI_ISL_3075182	EPI_SET_230103mu	Alpha	2021-06-07
hCoV-19/Denmark/DCGC-118240/2021	EPI_ISL_2670773	EPI_SET_230103mu	Alpha	2021-05-31
hCoV-19/Denmark/DCGC-118242/2021	EPI_ISL_2670774	EPI_SET_230103mu	Alpha	2021-06-14
hCoV-19/Denmark/DCGC-118246/2021	EPI_ISL_2670777	EPI_SET_230103mu	Alpha	2021-05-31
hCoV-19/Denmark/DCGC-118255/2021	EPI_ISL_2670782	EPI_SET_230103mu	Alpha	2021-06-07
hCoV-19/Denmark/DCGC-118256/2021	EPI_ISL_2670783	EPI_SET_230103mu	Alpha	2021-05-31
hCoV-19/Denmark/DCGC-118263/2021	EPI_ISL_2670788	EPI_SET_230103mu	Alpha	2021-05-31
hCoV-19/Denmark/DCGC-118269/2021	EPI_ISL_2670793	EPI_SET_230103mu	Alpha	2021-05-31
hCoV-19/Denmark/DCGC-118276/2021	EPI_ISL_2670800	EPI_SET_230103mu	Alpha	2021-06-07
hCoV-19/Denmark/DCGC-118280/2021	EPI_ISL_2670802	EPI_SET_230103mu	Alpha	2021-05-31
hCoV-19/Denmark/DCGC-118290/2021	EPI_ISL_3075190	EPI_SET_230103mu	Alpha	2021-05-31
hCoV-19/Denmark/DCGC-118297/2021	EPI_ISL_2670815	EPI_SET_230103mu	Alpha	2021-05-31
hCoV-19/Denmark/DCGC-118299/2021	EPI_ISL_2670817	EPI_SET_230103mu	Alpha	2021-05-31
hCoV-19/Denmark/DCGC-118307/2021	EPI_ISL_2670825	EPI_SET_230103mu	Alpha	2021-05-31
hCoV-19/Denmark/DCGC-118315/2021	EPI_ISL_2670832	EPI_SET_230103mu	Alpha	2021-05-31
hCoV-19/Denmark/DCGC-118327/2021	EPI_ISL_2670839	EPI_SET_230103mu	Alpha	2021-05-31
hCoV-19/Denmark/DCGC-118332/2021	EPI_ISL_2670842	EPI_SET_230103mu	Alpha	2021-05-24
hCoV-19/Denmark/DCGC-118336/2021	EPI_ISL_2670846	EPI_SET_230103zt	Delta	2021-06-07
hCoV-19/Denmark/DCGC-118341/2021	EPI_ISL_2670851	EPI_SET_230103mu	Alpha	2021-05-31
hCoV-19/Denmark/DCGC-118346/2021	EPI_ISL_2670853	EPI_SET_230103mu	Alpha	2021-05-31
hCoV-19/Denmark/DCGC-118354/2021	EPI_ISL_2670860	EPI_SET_230103mu	Alpha	2021-05-31
hCoV-19/Denmark/DCGC-118355/2021	EPI_ISL_2670861	EPI_SET_230103mu	Alpha	2021-06-07
hCoV-19/Denmark/DCGC-118361/2021	EPI_ISL_2670863	EPI_SET_230103mu	Alpha	2021-05-31
hCoV-19/Denmark/DCGC-118362/2021	EPI_ISL_2670864	EPI_SET_230103mu	Alpha	2021-06-07
hCoV-19/Denmark/DCGC-118371/2021	EPI_ISL_2670873	EPI_SET_230103mu	Alpha	2021-06-07
hCoV-19/Denmark/DCGC-118377/2021	EPI_ISL_2670877	EPI_SET_230103mu	Alpha	2021-05-31
hCoV-19/Denmark/DCGC-118384/2021	EPI_ISL_2670884	EPI_SET_230103mu	Alpha	2021-06-14
hCoV-19/Denmark/DCGC-118394/2021	EPI_ISL_2670889	EPI_SET_230103mu	Alpha	2021-05-31
hCoV-19/Denmark/DCGC-118401/2021	EPI_ISL_2670895	EPI_SET_230103mu	Alpha	2021-06-07
hCoV-19/Denmark/DCGC-118418/2021	EPI_ISL_3075202	EPI_SET_230103mu	Alpha	2021-05-31
hCoV-19/Denmark/DCGC-118425/2021	EPI_ISL_2670907	EPI_SET_230103mu	Alpha	2021-06-07
hCoV-19/Denmark/DCGC-118434/2021	EPI_ISL_2670914	EPI_SET_230103mu	Alpha	2021-05-31
hCoV-19/Denmark/DCGC-118436/2021	EPI_ISL_3075204	EPI_SET_230103mu	Alpha	2021-05-31
hCoV-19/Denmark/DCGC-118437/2021	EPI_ISL_3075205	EPI_SET_230103mu	Alpha	2021-05-31
hCoV-19/Denmark/DCGC-118439/2021	EPI_ISL_2670916	EPI_SET_230103mu	Alpha	2021-05-31
hCoV-19/Denmark/DCGC-118442/2021	EPI_ISL_2670917	EPI_SET_230103mu	Alpha	2021-06-07
hCoV-19/Denmark/DCGC-118449/2021	EPI_ISL_2670923	EPI_SET_230103mu	Alpha	2021-05-31
hCoV-19/Denmark/DCGC-118451/2021	EPI_ISL_2670925	EPI_SET_230103mu	Alpha	2021-05-31
hCoV-19/Denmark/DCGC-118453/2021	EPI_ISL_2670927	EPI_SET_230103mu	Alpha	2021-05-31
hCoV-19/Denmark/DCGC-118459/2021	EPI_ISL_2670930	EPI_SET_230103mu	Alpha	2021-06-07
hCoV-19/Denmark/DCGC-118467/2021	EPI_ISL_2670934	EPI_SET_230103mu	Alpha	2021-06-07
hCoV-19/Denmark/DCGC-118468/2021	EPI_ISL_3075210	EPI_SET_230103mu	Alpha	2021-05-31
hCoV-19/Denmark/DCGC-118472/2021	EPI_ISL_2670937	EPI_SET_230103mu	Alpha	2021-06-14
hCoV-19/Denmark/DCGC-118473/2021	EPI_ISL_2670938	EPI_SET_230103mu	Alpha	2021-06-07
hCoV-19/Denmark/DCGC-118483/2021	EPI_ISL_3075212	EPI_SET_230103mu	Alpha	2021-05-31
hCoV-19/Denmark/DCGC-118486/2021	EPI_ISL_3075213	EPI_SET_230103mu	Alpha	2021-05-31
hCoV-19/Denmark/DCGC-118490/2021	EPI_ISL_2670946	EPI_SET_230103mu	Alpha	2021-05-31
hCoV-19/Denmark/DCGC-118491/2021	EPI_ISL_2670947	EPI_SET_230103mu	Alpha	2021-05-31
hCoV-19/Denmark/DCGC-118494/2021	EPI_ISL_3075215	EPI_SET_230103mu	Alpha	2021-05-31
hCoV-19/Denmark/DCGC-118497/2021	EPI_ISL_2670950	EPI_SET_230103mu	Alpha	2021-05-31
hCoV-19/Denmark/DCGC-118500/2021	EPI_ISL_2670952	EPI_SET_230103mu	Alpha	2021-05-31
hCoV-19/Denmark/DCGC-118501/2021	EPI_ISL_2670953	EPI_SET_230103mu	Alpha	2021-05-31
hCoV-19/Denmark/DCGC-118503/2021	EPI_ISL_2670955	EPI_SET_230103mu	Alpha	2021-05-31
hCoV-19/Denmark/DCGC-118505/2021	EPI_ISL_2670957	EPI_SET_230103mu	Alpha	2021-05-31
hCoV-19/Denmark/DCGC-118510/2021	EPI_ISL_2670960	EPI_SET_230103mu	Alpha	2021-05-31
hCoV-19/Denmark/DCGC-118518/2021	EPI_ISL_3075219	EPI_SET_230103mu	Alpha	2021-06-07
hCoV-19/Denmark/DCGC-118522/2021	EPI_ISL_2670970	EPI_SET_230103mu	Alpha	2021-05-31
hCoV-19/Denmark/DCGC-118523/2021	EPI_ISL_2670971	EPI_SET_230103mu	Alpha	2021-05-31
hCoV-19/Denmark/DCGC-118526/2021	EPI_ISL_2670973	EPI_SET_230103mu	Alpha	2021-05-31
hCoV-19/Denmark/DCGC-118528/2021	EPI_ISL_3075220	EPI_SET_230103mu	Alpha	2021-05-31
hCoV-19/Denmark/DCGC-118548/2021	EPI_ISL_2670987	EPI_SET_230103mu	Alpha	2021-05-31
hCoV-19/Denmark/DCGC-118555/2021	EPI_ISL_2670993	EPI_SET_230103mu	Alpha	2021-05-31
hCoV-19/Denmark/DCGC-118557/2021	EPI_ISL_2670995	EPI_SET_230103mu	Alpha	2021-05-31
hCoV-19/Denmark/DCGC-118575/2021	EPI_ISL_3075227	EPI_SET_230103mu	Alpha	2021-05-31
hCoV-19/Denmark/DCGC-118577/2021	EPI_ISL_2671012	EPI_SET_230103mu	Alpha	2021-06-07
hCoV-19/Denmark/DCGC-118578/2021	EPI_ISL_2671013	EPI_SET_230103mu	Alpha	2021-05-31
hCoV-19/Denmark/DCGC-118579/2021	EPI_ISL_2671014	EPI_SET_230103mu	Alpha	2021-06-07
hCoV-19/Denmark/DCGC-118581/2021	EPI_ISL_2671016	EPI_SET_230103mu	Alpha	2021-05-31
hCoV-19/Denmark/DCGC-118583/2021	EPI_ISL_2671017	EPI_SET_230103mu	Alpha	2021-05-31
hCoV-19/Denmark/DCGC-118584/2021	EPI_ISL_2671018	EPI_SET_230103mu	Alpha	2021-05-31
hCoV-19/Denmark/DCGC-118592/2021	EPI_ISL_2671026	EPI_SET_230103mu	Alpha	2021-05-31
hCoV-19/Denmark/DCGC-118595/2021	EPI_ISL_3075229	EPI_SET_230103mu	Alpha	2021-05-31
hCoV-19/Denmark/DCGC-118606/2021	EPI_ISL_2671035	EPI_SET_230103mu	Alpha	2021-05-31
hCoV-19/Denmark/DCGC-118608/2021	EPI_ISL_2671037	EPI_SET_230103mu	Alpha	2021-05-31
hCoV-19/Denmark/DCGC-118614/2021	EPI_ISL_2671041	EPI_SET_230103mu	Alpha	2021-05-31
hCoV-19/Denmark/DCGC-118624/2021	EPI_ISL_2671048	EPI_SET_230103mu	Alpha	2021-06-14
hCoV-19/Denmark/DCGC-118630/2021	EPI_ISL_2671052	EPI_SET_230103mu	Alpha	2021-05-31
hCoV-19/Denmark/DCGC-118642/2021	EPI_ISL_2671061	EPI_SET_230103mu	Alpha	2021-05-31
hCoV-19/Denmark/DCGC-118643/2021	EPI_ISL_3075233	EPI_SET_230103mu	Alpha	2021-06-07
hCoV-19/Denmark/DCGC-118646/2021	EPI_ISL_2671064	EPI_SET_230103mu	Alpha	2021-06-07
hCoV-19/Denmark/DCGC-118649/2021	EPI_ISL_2671067	EPI_SET_230103mu	Alpha	2021-05-31
hCoV-19/Denmark/DCGC-118650/2021	EPI_ISL_2671068	EPI_SET_230103mu	Alpha	2021-06-07
hCoV-19/Denmark/DCGC-118651/2021	EPI_ISL_3075234	EPI_SET_230103mu	Alpha	2021-05-31
hCoV-19/Denmark/DCGC-118652/2021	EPI_ISL_2671070	EPI_SET_230103mu	Alpha	2021-06-07
hCoV-19/Denmark/DCGC-118659/2021	EPI_ISL_2671076	EPI_SET_230103mu	Alpha	2021-05-31
hCoV-19/Denmark/DCGC-118662/2021	EPI_ISL_3075236	EPI_SET_230103mu	Alpha	2021-05-31
hCoV-19/Denmark/DCGC-118664/2021	EPI_ISL_2671080	EPI_SET_230103mu	Alpha	2021-06-14
hCoV-19/Denmark/DCGC-118672/2021	EPI_ISL_2671084	EPI_SET_230103mu	Alpha	2021-06-07
hCoV-19/Denmark/DCGC-118678/2021	EPI_ISL_2671088	EPI_SET_230103mu	Alpha	2021-05-31
hCoV-19/Denmark/DCGC-118680/2021	EPI_ISL_2671090	EPI_SET_230103mu	Alpha	2021-05-31
hCoV-19/Denmark/DCGC-118684/2021	EPI_ISL_2671093	EPI_SET_230103mu	Alpha	2021-05-24
hCoV-19/Denmark/DCGC-118686/2021	EPI_ISL_2671094	EPI_SET_230103mu	Alpha	2021-05-31
hCoV-19/Denmark/DCGC-118689/2021	EPI_ISL_2671096	EPI_SET_230103mu	Alpha	2021-06-07
hCoV-19/Denmark/DCGC-118690/2021	EPI_ISL_2671097	EPI_SET_230103mu	Alpha	2021-06-07
hCoV-19/Denmark/DCGC-118696/2021	EPI_ISL_3075241	EPI_SET_230103mu	Alpha	2021-05-31
hCoV-19/Denmark/DCGC-118715/2021	EPI_ISL_2671113	EPI_SET_230103mu	Alpha	2021-05-31
hCoV-19/Denmark/DCGC-118718/2021	EPI_ISL_2671116	EPI_SET_230103mu	Alpha	2021-06-07
hCoV-19/Denmark/DCGC-118719/2021	EPI_ISL_2671117	EPI_SET_230103mu	Alpha	2021-05-31
hCoV-19/Denmark/DCGC-118720/2021	EPI_ISL_2671118	EPI_SET_230103mu	Alpha	2021-06-07
hCoV-19/Denmark/DCGC-118723/2021	EPI_ISL_2671120	EPI_SET_230103mu	Alpha	2021-05-31
hCoV-19/Denmark/DCGC-118726/2021	EPI_ISL_2671122	EPI_SET_230103mu	Alpha	2021-06-14
hCoV-19/Denmark/DCGC-118737/2021	EPI_ISL_2671132	EPI_SET_230103mu	Alpha	2021-05-31
hCoV-19/Denmark/DCGC-118738/2021	EPI_ISL_3075247	EPI_SET_230103mu	Alpha	2021-05-31
hCoV-19/Denmark/DCGC-118741/2021	EPI_ISL_2671135	EPI_SET_230103mu	Alpha	2021-06-07
hCoV-19/Denmark/DCGC-118742/2021	EPI_ISL_2671136	EPI_SET_230103mu	Alpha	2021-05-31
hCoV-19/Denmark/DCGC-118743/2021	EPI_ISL_2671137	EPI_SET_230103mu	Alpha	2021-06-07
hCoV-19/Denmark/DCGC-118751/2021	EPI_ISL_2671142	EPI_SET_230103mu	Alpha	2021-05-31
hCoV-19/Denmark/DCGC-118752/2021	EPI_ISL_2671143	EPI_SET_230103mu	Alpha	2021-05-31
hCoV-19/Denmark/DCGC-118753/2021	EPI_ISL_2671144	EPI_SET_230103mu	Alpha	2021-05-31
hCoV-19/Denmark/DCGC-118756/2021	EPI_ISL_2671147	EPI_SET_230103mu	Alpha	2021-05-31
hCoV-19/Denmark/DCGC-118761/2021	EPI_ISL_2671150	EPI_SET_230103mu	Alpha	2021-06-07
hCoV-19/Denmark/DCGC-118764/2021	EPI_ISL_2671153	EPI_SET_230103mu	Alpha	2021-05-31
hCoV-19/Denmark/DCGC-118768/2021	EPI_ISL_2671157	EPI_SET_230103mu	Alpha	2021-05-31
hCoV-19/Denmark/DCGC-118769/2021	EPI_ISL_2671158	EPI_SET_230103mu	Alpha	2021-05-31
hCoV-19/Denmark/DCGC-118778/2021	EPI_ISL_2671165	EPI_SET_230103mu	Alpha	2021-05-31
hCoV-19/Denmark/DCGC-118790/2021	EPI_ISL_2671175	EPI_SET_230103mu	Alpha	2021-05-31
hCoV-19/Denmark/DCGC-118794/2021	EPI_ISL_2671178	EPI_SET_230103mu	Alpha	2021-05-31
hCoV-19/Denmark/DCGC-118796/2021	EPI_ISL_2671180	EPI_SET_230103mu	Alpha	2021-05-31
hCoV-19/Denmark/DCGC-118797/2021	EPI_ISL_3075252	EPI_SET_230103mu	Alpha	2021-05-31
hCoV-19/Denmark/DCGC-118803/2021	EPI_ISL_2671185	EPI_SET_230103mu	Alpha	2021-05-31
hCoV-19/Denmark/DCGC-118809/2021	EPI_ISL_3075256	EPI_SET_230103mu	Alpha	2021-06-07
hCoV-19/Denmark/DCGC-118811/2021	EPI_ISL_2671188	EPI_SET_230103mu	Alpha	2021-06-07
hCoV-19/Denmark/DCGC-118819/2021	EPI_ISL_2671194	EPI_SET_230103mu	Alpha	2021-06-07
hCoV-19/Denmark/DCGC-118830/2021	EPI_ISL_2671202	EPI_SET_230103mu	Alpha	2021-05-31
hCoV-19/Denmark/DCGC-118833/2021	EPI_ISL_3075260	EPI_SET_230103mu	Alpha	2021-06-07
hCoV-19/Denmark/DCGC-118836/2021	EPI_ISL_2671207	EPI_SET_230103mu	Alpha	2021-05-31
hCoV-19/Denmark/DCGC-118844/2021	EPI_ISL_2671214	EPI_SET_230103mu	Alpha	2021-05-24
hCoV-19/Denmark/DCGC-118853/2021	EPI_ISL_2671221	EPI_SET_230103mu	Alpha	2021-05-31
hCoV-19/Denmark/DCGC-118855/2021	EPI_ISL_2671223	EPI_SET_230103mu	Alpha	2021-05-31
hCoV-19/Denmark/DCGC-118857/2021	EPI_ISL_3075262	EPI_SET_230103mu	Alpha	2021-05-31
hCoV-19/Denmark/DCGC-118864/2021	EPI_ISL_2671228	EPI_SET_230103mu	Alpha	2021-05-31
hCoV-19/Denmark/DCGC-118875/2021	EPI_ISL_2671236	EPI_SET_230103mu	Alpha	2021-05-31
hCoV-19/Denmark/DCGC-118881/2021	EPI_ISL_2671241	EPI_SET_230103mu	Alpha	2021-05-31
hCoV-19/Denmark/DCGC-118885/2021	EPI_ISL_3075265	EPI_SET_230103mu	Alpha	2021-05-31
hCoV-19/Denmark/DCGC-118895/2021	EPI_ISL_2671251	EPI_SET_230103mu	Alpha	2021-05-31
hCoV-19/Denmark/DCGC-118910/2021	EPI_ISL_2671265	EPI_SET_230103mu	Alpha	2021-05-31
hCoV-19/Denmark/DCGC-118911/2021	EPI_ISL_2671266	EPI_SET_230103mu	Alpha	2021-05-31
hCoV-19/Denmark/DCGC-118917/2021	EPI_ISL_2671271	EPI_SET_230103mu	Alpha	2021-06-07
hCoV-19/Denmark/DCGC-118920/2021	EPI_ISL_2671273	EPI_SET_230103mu	Alpha	2021-05-31
hCoV-19/Denmark/DCGC-118921/2021	EPI_ISL_2671274	EPI_SET_230103mu	Alpha	2021-05-31
hCoV-19/Denmark/DCGC-118932/2021	EPI_ISL_2671280	EPI_SET_230103mu	Alpha	2021-05-31
hCoV-19/Denmark/DCGC-118933/2021	EPI_ISL_2671281	EPI_SET_230103mu	Alpha	2021-05-31
hCoV-19/Denmark/DCGC-118938/2021	EPI_ISL_3075269	EPI_SET_230103mu	Alpha	2021-06-07
hCoV-19/Denmark/DCGC-118939/2021	EPI_ISL_2671285	EPI_SET_230103mu	Alpha	2021-06-14
hCoV-19/Denmark/DCGC-118940/2021	EPI_ISL_2671286	EPI_SET_230103mu	Alpha	2021-05-31
hCoV-19/Denmark/DCGC-118942/2021	EPI_ISL_2671288	EPI_SET_230103mu	Alpha	2021-06-14
hCoV-19/Denmark/DCGC-118946/2021	EPI_ISL_2671290	EPI_SET_230103mu	Alpha	2021-05-31
hCoV-19/Denmark/DCGC-118953/2021	EPI_ISL_2671295	EPI_SET_230103mu	Alpha	2021-06-07
hCoV-19/Denmark/DCGC-118956/2021	EPI_ISL_2671298	EPI_SET_230103mu	Alpha	2021-05-31
hCoV-19/Denmark/DCGC-118957/2021	EPI_ISL_2671299	EPI_SET_230103mu	Alpha	2021-05-31
hCoV-19/Denmark/DCGC-118958/2021	EPI_ISL_3075270	EPI_SET_230103mu	Alpha	2021-05-31
hCoV-19/Denmark/DCGC-118972/2021	EPI_ISL_2671309	EPI_SET_230103mu	Alpha	2021-05-31
hCoV-19/Denmark/DCGC-118982/2021	EPI_ISL_2671317	EPI_SET_230103mu	Alpha	2021-05-31
hCoV-19/Denmark/DCGC-118987/2021	EPI_ISL_2671320	EPI_SET_230103mu	Alpha	2021-05-31
hCoV-19/Denmark/DCGC-118993/2021	EPI_ISL_2671326	EPI_SET_230103mu	Alpha	2021-05-31
hCoV-19/Denmark/DCGC-118999/2021	EPI_ISL_2671330	EPI_SET_230103mu	Alpha	2021-06-07
hCoV-19/Denmark/DCGC-119002/2021	EPI_ISL_2671333	EPI_SET_230103mu	Alpha	2021-06-07
hCoV-19/Denmark/DCGC-119008/2021	EPI_ISL_3075273	EPI_SET_230103mu	Alpha	2021-05-31
hCoV-19/Denmark/DCGC-119020/2021	EPI_ISL_2671346	EPI_SET_230103mu	Alpha	2021-06-07
hCoV-19/Denmark/DCGC-119026/2021	EPI_ISL_2671351	EPI_SET_230103mu	Alpha	2021-05-31
hCoV-19/Denmark/DCGC-119030/2021	EPI_ISL_2671354	EPI_SET_230103mu	Alpha	2021-06-07
hCoV-19/Denmark/DCGC-119031/2021	EPI_ISL_2671355	EPI_SET_230103mu	Alpha	2021-05-31
hCoV-19/Denmark/DCGC-119061/2021	EPI_ISL_2684257	EPI_SET_230103mu	Alpha	2021-05-03
hCoV-19/Denmark/DCGC-119560/2021	EPI_ISL_2684631	EPI_SET_230103mu	Alpha	2021-05-03
hCoV-19/Denmark/DCGC-119888/2021	EPI_ISL_2684867	EPI_SET_230103mu	Alpha	2021-05-03
hCoV-19/Denmark/DCGC-120081/2021	EPI_ISL_2685000	EPI_SET_230103mu	Alpha	2021-05-03
hCoV-19/Denmark/DCGC-120553/2021	EPI_ISL_2685368	EPI_SET_230103mu	Alpha	2021-05-03
hCoV-19/Denmark/DCGC-120956/2021	EPI_ISL_2685672	EPI_SET_230103mu	Alpha	2021-05-03
hCoV-19/Denmark/DCGC-121013/2021	EPI_ISL_2685719	EPI_SET_230103mu	Alpha	2021-05-03
hCoV-19/Denmark/DCGC-121045/2021	EPI_ISL_2685744	EPI_SET_230103mu	Alpha	2021-05-03
hCoV-19/Denmark/DCGC-121204/2021	EPI_ISL_2747506	EPI_SET_230103zt	Delta	2021-06-23
hCoV-19/Denmark/DCGC-121388/2021	EPI_ISL_2747742	EPI_SET_230103zt	Delta	2021-06-23
hCoV-19/Denmark/DCGC-121395/2021	EPI_ISL_2747754	EPI_SET_230103zt	Delta	2021-06-25
hCoV-19/Denmark/DCGC-121405/2021	EPI_ISL_2747769	EPI_SET_230103zt	Delta	2021-06-25
hCoV-19/Denmark/DCGC-121406/2021	EPI_ISL_2747771	EPI_SET_230103zt	Delta	2021-06-25
hCoV-19/Denmark/DCGC-121438/2021	EPI_ISL_2747815	EPI_SET_230103zt	Delta	2021-06-22
hCoV-19/Denmark/DCGC-121485/2021	EPI_ISL_2747881	EPI_SET_230103zt	Delta	2021-06-21
hCoV-19/Denmark/DCGC-121533/2021	EPI_ISL_2747947	EPI_SET_230103zt	Delta	2021-06-25
hCoV-19/Denmark/DCGC-121554/2021	EPI_ISL_2747968	EPI_SET_230103zt	Delta	2021-06-21
hCoV-19/Denmark/DCGC-121591/2021	EPI_ISL_2748010	EPI_SET_230103zt	Delta	2021-06-25
hCoV-19/Denmark/DCGC-121615/2021	EPI_ISL_2748041	EPI_SET_230103zt	Delta	2021-06-24
hCoV-19/Denmark/DCGC-121654/2021	EPI_ISL_2748094	EPI_SET_230103zt	Delta	2021-06-23
hCoV-19/Denmark/DCGC-121666/2021	EPI_ISL_2748109	EPI_SET_230103zt	Delta	2021-06-24
hCoV-19/Denmark/DCGC-121711/2021	EPI_ISL_2748166	EPI_SET_230103zt	Delta	2021-06-24
hCoV-19/Denmark/DCGC-121767/2021	EPI_ISL_2748234	EPI_SET_230103zt	Delta	2021-06-22
hCoV-19/Denmark/DCGC-121854/2021	EPI_ISL_2748341	EPI_SET_230103zt	Delta	2021-06-24
hCoV-19/Denmark/DCGC-121874/2021	EPI_ISL_2748370	EPI_SET_230103zt	Delta	2021-06-24
hCoV-19/Denmark/DCGC-121889/2021	EPI_ISL_2748388	EPI_SET_230103zt	Delta	2021-06-21
hCoV-19/Denmark/DCGC-121901/2021	EPI_ISL_2748403	EPI_SET_230103zt	Delta	2021-06-22
hCoV-19/Denmark/DCGC-122051/2021	EPI_ISL_2784401	EPI_SET_230103mu	Alpha	2021-06-20
hCoV-19/Denmark/DCGC-122080/2021	EPI_ISL_3075863	EPI_SET_230103mu	Alpha	2021-06-24
hCoV-19/Denmark/DCGC-122095/2021	EPI_ISL_2784431	EPI_SET_230103mu	Alpha	2021-06-18
hCoV-19/Denmark/DCGC-122106/2021	EPI_ISL_2784441	EPI_SET_230103zt	Delta	2021-06-26
hCoV-19/Denmark/DCGC-122146/2021	EPI_ISL_2784474	EPI_SET_230103zt	Delta	2021-06-25
hCoV-19/Denmark/DCGC-122149/2021	EPI_ISL_2784477	EPI_SET_230103mu	Alpha	2021-06-28
hCoV-19/Denmark/DCGC-122193/2021	EPI_ISL_2784508	EPI_SET_230103zt	Delta	2021-06-26
hCoV-19/Denmark/DCGC-122220/2021	EPI_ISL_2784529	EPI_SET_230103zt	Delta	2021-06-26
hCoV-19/Denmark/DCGC-122230/2021	EPI_ISL_3075881	EPI_SET_230103mu	Alpha	2021-06-23
hCoV-19/Denmark/DCGC-122267/2021	EPI_ISL_2784560	EPI_SET_230103mu	Alpha	2021-06-20
hCoV-19/Denmark/DCGC-122272/2021	EPI_ISL_2784563	EPI_SET_230103mu	Alpha	2021-06-28
hCoV-19/Denmark/DCGC-122277/2021	EPI_ISL_3075893	EPI_SET_230103mu	Alpha	2021-06-20
hCoV-19/Denmark/DCGC-122304/2021	EPI_ISL_2784585	EPI_SET_230103mu	Alpha	2021-06-22
hCoV-19/Denmark/DCGC-122334/2021	EPI_ISL_2784609	EPI_SET_230103zt	Delta	2021-06-27
hCoV-19/Denmark/DCGC-122341/2021	EPI_ISL_4256915	EPI_SET_230103zt	Delta	2021-06-22
hCoV-19/Denmark/DCGC-122360/2021	EPI_ISL_2784628	EPI_SET_230103mu	Alpha	2021-06-21
hCoV-19/Denmark/DCGC-122364/2021	EPI_ISL_2784631	EPI_SET_230103mu	Alpha	2021-06-23
hCoV-19/Denmark/DCGC-122434/2021	EPI_ISL_2819045	EPI_SET_230103zt	Delta	2021-06-29
hCoV-19/Denmark/DCGC-122451/2021	EPI_ISL_2819067	EPI_SET_230103zt	Delta	2021-06-29
hCoV-19/Denmark/DCGC-122467/2021	EPI_ISL_2819100	EPI_SET_230103mu	Alpha	2021-06-29
hCoV-19/Denmark/DCGC-122471/2021	EPI_ISL_2819108	EPI_SET_230103mu	Alpha	2021-06-29
hCoV-19/Denmark/DCGC-122498/2021	EPI_ISL_3075926	EPI_SET_230103mu	Alpha	2021-06-29
hCoV-19/Denmark/DCGC-122518/2021	EPI_ISL_3075932	EPI_SET_230103mu	Alpha	2021-06-29
hCoV-19/Denmark/DCGC-122530/2021	EPI_ISL_2819183	EPI_SET_230103zt	Delta	2021-06-29
hCoV-19/Denmark/DCGC-122534/2021	EPI_ISL_2819190	EPI_SET_230103zt	Delta	2021-06-28
hCoV-19/Denmark/DCGC-122544/2021	EPI_ISL_2819206	EPI_SET_230103zt	Delta	2021-06-29
hCoV-19/Denmark/DCGC-122546/2021	EPI_ISL_3075939	EPI_SET_230103mu	Alpha	2021-06-29
hCoV-19/Denmark/DCGC-122552/2021	EPI_ISL_2819219	EPI_SET_230103zt	Delta	2021-06-29
hCoV-19/Denmark/DCGC-122567/2021	EPI_ISL_2819240	EPI_SET_230103zt	Delta	2021-06-29
hCoV-19/Denmark/DCGC-122574/2021	EPI_ISL_2819252	EPI_SET_230103zt	Delta	2021-06-29
hCoV-19/Denmark/DCGC-122575/2021	EPI_ISL_2819254	EPI_SET_230103mu	Alpha	2021-06-29
hCoV-19/Denmark/DCGC-122577/2021	EPI_ISL_2819256	EPI_SET_230103zt	Delta	2021-06-29
hCoV-19/Denmark/DCGC-122592/2021	EPI_ISL_3075949	EPI_SET_230103mu	Alpha	2021-06-29
hCoV-19/Denmark/DCGC-122614/2021	EPI_ISL_2819313	EPI_SET_230103mu	Alpha	2021-06-29
hCoV-19/Denmark/DCGC-122638/2021	EPI_ISL_2819345	EPI_SET_230103zt	Delta	2021-06-28
hCoV-19/Denmark/DCGC-122644/2021	EPI_ISL_3075964	EPI_SET_230103mu	Alpha	2021-06-29
hCoV-19/Denmark/DCGC-122658/2021	EPI_ISL_2819368	EPI_SET_230103mu	Alpha	2021-06-29
hCoV-19/Denmark/DCGC-122667/2021	EPI_ISL_2819378	EPI_SET_230103zt	Delta	2021-06-29
hCoV-19/Denmark/DCGC-122684/2021	EPI_ISL_2819406	EPI_SET_230103mu	Alpha	2021-06-29
hCoV-19/Denmark/DCGC-122686/2021	EPI_ISL_4256916	EPI_SET_230103mu	Alpha	2021-06-29
hCoV-19/Denmark/DCGC-122688/2021	EPI_ISL_2819408	EPI_SET_230103zt	Delta	2021-06-29
hCoV-19/Denmark/DCGC-122700/2021	EPI_ISL_3075981	EPI_SET_230103mu	Alpha	2021-06-29
hCoV-19/Denmark/DCGC-122711/2021	EPI_ISL_2819438	EPI_SET_230103zt	Delta	2021-06-29
hCoV-19/Denmark/DCGC-122714/2021	EPI_ISL_2819440	EPI_SET_230103mu	Alpha	2021-06-29
hCoV-19/Denmark/DCGC-122720/2021	EPI_ISL_2819452	EPI_SET_230103zt	Delta	2021-06-29
hCoV-19/Denmark/DCGC-122737/2021	EPI_ISL_3075994	EPI_SET_230103mu	Alpha	2021-06-29
hCoV-19/Denmark/DCGC-122747/2021	EPI_ISL_2819480	EPI_SET_230103zt	Delta	2021-06-29
hCoV-19/Denmark/DCGC-122771/2021	EPI_ISL_2819517	EPI_SET_230103zt	Delta	2021-06-29
hCoV-19/Denmark/DCGC-122830/2021	EPI_ISL_2819600	EPI_SET_230103mu	Alpha	2021-06-29
hCoV-19/Denmark/DCGC-122852/2021	EPI_ISL_2819628	EPI_SET_230103mu	Alpha	2021-06-29
hCoV-19/Denmark/DCGC-122853/2021	EPI_ISL_2819630	EPI_SET_230103mu	Alpha	2021-06-29
hCoV-19/Denmark/DCGC-122857/2021	EPI_ISL_2819635	EPI_SET_230103zt	Delta	2021-06-29
hCoV-19/Denmark/DCGC-122875/2021	EPI_ISL_2819660	EPI_SET_230103mu	Alpha	2021-06-29
hCoV-19/Denmark/DCGC-122892/2021	EPI_ISL_2819685	EPI_SET_230103zt	Delta	2021-06-29
hCoV-19/Denmark/DCGC-122927/2021	EPI_ISL_2838078	EPI_SET_230103zt	Delta	2021-07-01
hCoV-19/Denmark/DCGC-122972/2021	EPI_ISL_2838116	EPI_SET_230103mu	Alpha	2021-06-30
hCoV-19/Denmark/DCGC-123022/2021	EPI_ISL_2838154	EPI_SET_230103mu	Alpha	2021-06-30
hCoV-19/Denmark/DCGC-123027/2021	EPI_ISL_2838159	EPI_SET_230103mu	Alpha	2021-06-30
hCoV-19/Denmark/DCGC-123041/2021	EPI_ISL_2838172	EPI_SET_230103mu	Alpha	2021-06-30
hCoV-19/Denmark/DCGC-123045/2021	EPI_ISL_2838175	EPI_SET_230103mu	Alpha	2021-06-30
hCoV-19/Denmark/DCGC-123047/2021	EPI_ISL_2838177	EPI_SET_230103mu	Alpha	2021-06-30
hCoV-19/Denmark/DCGC-123060/2021	EPI_ISL_2838187	EPI_SET_230103mu	Alpha	2021-06-30
hCoV-19/Denmark/DCGC-123102/2021	EPI_ISL_2838222	EPI_SET_230103zt	Delta	2021-06-30
hCoV-19/Denmark/DCGC-123104/2021	EPI_ISL_2838224	EPI_SET_230103mu	Alpha	2021-06-30
hCoV-19/Denmark/DCGC-123161/2021	EPI_ISL_2838266	EPI_SET_230103mu	Alpha	2021-06-30
hCoV-19/Denmark/DCGC-123167/2021	EPI_ISL_2838271	EPI_SET_230103mu	Alpha	2021-06-30
hCoV-19/Denmark/DCGC-123179/2021	EPI_ISL_2838282	EPI_SET_230103zt	Delta	2021-06-30
hCoV-19/Denmark/DCGC-123223/2021	EPI_ISL_2838317	EPI_SET_230103mu	Alpha	2021-06-30
hCoV-19/Denmark/DCGC-123226/2021	EPI_ISL_2838320	EPI_SET_230103mu	Alpha	2021-06-30
hCoV-19/Denmark/DCGC-123263/2021	EPI_ISL_2838349	EPI_SET_230103zt	Delta	2021-06-30
hCoV-19/Denmark/DCGC-123277/2021	EPI_ISL_2854278	EPI_SET_230103mu	Alpha	2021-07-02
hCoV-19/Denmark/DCGC-123285/2021	EPI_ISL_3076088	EPI_SET_230103mu	Alpha	2021-07-01
hCoV-19/Denmark/DCGC-123330/2021	EPI_ISL_2854314	EPI_SET_230103mu	Alpha	2021-07-01
hCoV-19/Denmark/DCGC-123389/2021	EPI_ISL_3076100	EPI_SET_230103mu	Alpha	2021-07-02
hCoV-19/Denmark/DCGC-123392/2021	EPI_ISL_2854361	EPI_SET_230103mu	Alpha	2021-07-01
hCoV-19/Denmark/DCGC-123393/2021	EPI_ISL_2854362	EPI_SET_230103mu	Alpha	2021-07-01
hCoV-19/Denmark/DCGC-123394/2021	EPI_ISL_2854363	EPI_SET_230103mu	Alpha	2021-07-02
hCoV-19/Denmark/DCGC-123448/2021	EPI_ISL_2854404	EPI_SET_230103mu	Alpha	2021-07-02
hCoV-19/Denmark/DCGC-123494/2021	EPI_ISL_2854436	EPI_SET_230103zt	Delta	2021-07-02
hCoV-19/Denmark/DCGC-123502/2021	EPI_ISL_2854442	EPI_SET_230103mu	Alpha	2021-07-01
hCoV-19/Denmark/DCGC-123545/2021	EPI_ISL_2854469	EPI_SET_230103zt	Delta	2021-07-01
hCoV-19/Denmark/DCGC-123564/2021	EPI_ISL_2854481	EPI_SET_230103mu	Alpha	2021-07-02
hCoV-19/Denmark/DCGC-123570/2021	EPI_ISL_2854486	EPI_SET_230103mu	Alpha	2021-07-01
hCoV-19/Denmark/DCGC-123617/2021	EPI_ISL_2854523	EPI_SET_230103mu	Alpha	2021-06-27
hCoV-19/Denmark/DCGC-123618/2021	EPI_ISL_2854524	EPI_SET_230103zt	Delta	2021-06-28
hCoV-19/Denmark/DCGC-123665/2021	EPI_ISL_2854555	EPI_SET_230103mu	Alpha	2021-07-01
hCoV-19/Denmark/DCGC-123680/2021	EPI_ISL_2854568	EPI_SET_230103mu	Alpha	2021-07-01
hCoV-19/Denmark/DCGC-123698/2021	EPI_ISL_2854579	EPI_SET_230103zt	Delta	2021-07-02
hCoV-19/Denmark/DCGC-123704/2021	EPI_ISL_2854585	EPI_SET_230103mu	Alpha	2021-06-29
hCoV-19/Denmark/DCGC-123711/2021	EPI_ISL_2854589	EPI_SET_230103zt	Delta	2021-07-01
hCoV-19/Denmark/DCGC-123723/2021	EPI_ISL_2854595	EPI_SET_230103mu	Alpha	2021-06-27
hCoV-19/Denmark/DCGC-123732/2021	EPI_ISL_2854602	EPI_SET_230103mu	Alpha	2021-07-01
hCoV-19/Denmark/DCGC-123737/2021	EPI_ISL_2854607	EPI_SET_230103mu	Alpha	2021-07-01
hCoV-19/Denmark/DCGC-123742/2021	EPI_ISL_2854610	EPI_SET_230103mu	Alpha	2021-06-25
hCoV-19/Denmark/DCGC-123748/2021	EPI_ISL_2854616	EPI_SET_230103mu	Alpha	2021-06-24
hCoV-19/Denmark/DCGC-123751/2021	EPI_ISL_3076146	EPI_SET_230103mu	Alpha	2021-06-29
hCoV-19/Denmark/DCGC-123771/2021	EPI_ISL_2854634	EPI_SET_230103mu	Alpha	2021-06-29
hCoV-19/Denmark/DCGC-123782/2021	EPI_ISL_2854643	EPI_SET_230103mu	Alpha	2021-06-24
hCoV-19/Denmark/DCGC-124823/2021	EPI_ISL_2896304	EPI_SET_230103mu	Alpha	2021-07-06
hCoV-19/Denmark/DCGC-124824/2021	EPI_ISL_2896305	EPI_SET_230103zt	Delta	2021-07-06
hCoV-19/Denmark/DCGC-124863/2021	EPI_ISL_2896330	EPI_SET_230103zt	Delta	2021-07-06
hCoV-19/Denmark/DCGC-124896/2021	EPI_ISL_2896354	EPI_SET_230103zt	Delta	2021-07-07
hCoV-19/Denmark/DCGC-124906/2021	EPI_ISL_2896362	EPI_SET_230103zt	Delta	2021-07-07
hCoV-19/Denmark/DCGC-124915/2021	EPI_ISL_2896369	EPI_SET_230103zt	Delta	2021-07-06
hCoV-19/Denmark/DCGC-124924/2021	EPI_ISL_2896376	EPI_SET_230103zt	Delta	2021-07-06
hCoV-19/Denmark/DCGC-124939/2021	EPI_ISL_2896389	EPI_SET_230103zt	Delta	2021-07-06
hCoV-19/Denmark/DCGC-124941/2021	EPI_ISL_2896390	EPI_SET_230103zt	Delta	2021-07-07
hCoV-19/Denmark/DCGC-124948/2021	EPI_ISL_2896394	EPI_SET_230103zt	Delta	2021-07-07
hCoV-19/Denmark/DCGC-124955/2021	EPI_ISL_2896400	EPI_SET_230103zt	Delta	2021-07-07
hCoV-19/Denmark/DCGC-124966/2021	EPI_ISL_2896408	EPI_SET_230103zt	Delta	2021-07-07
hCoV-19/Denmark/DCGC-124973/2021	EPI_ISL_3076337	EPI_SET_230103mu	Alpha	2021-07-06
hCoV-19/Denmark/DCGC-124982/2021	EPI_ISL_2896423	EPI_SET_230103zt	Delta	2021-07-06
hCoV-19/Denmark/DCGC-124996/2021	EPI_ISL_2896433	EPI_SET_230103zt	Delta	2021-07-06
hCoV-19/Denmark/DCGC-125025/2021	EPI_ISL_2896452	EPI_SET_230103zt	Delta	2021-07-07
hCoV-19/Denmark/DCGC-125050/2021	EPI_ISL_2896471	EPI_SET_230103zt	Delta	2021-07-02
hCoV-19/Denmark/DCGC-125053/2021	EPI_ISL_2896474	EPI_SET_230103zt	Delta	2021-07-06
hCoV-19/Denmark/DCGC-125061/2021	EPI_ISL_2896481	EPI_SET_230103zt	Delta	2021-07-06
hCoV-19/Denmark/DCGC-125066/2021	EPI_ISL_2896486	EPI_SET_230103zt	Delta	2021-07-06
hCoV-19/Denmark/DCGC-125074/2021	EPI_ISL_2896492	EPI_SET_230103mu	Alpha	2021-07-06
hCoV-19/Denmark/DCGC-125142/2021	EPI_ISL_2896541	EPI_SET_230103zt	Delta	2021-07-07
hCoV-19/Denmark/DCGC-125158/2021	EPI_ISL_2896552	EPI_SET_230103zt	Delta	2021-07-07
hCoV-19/Denmark/DCGC-125172/2021	EPI_ISL_2896562	EPI_SET_230103mu	Alpha	2021-07-06
hCoV-19/Denmark/DCGC-125233/2021	EPI_ISL_2896605	EPI_SET_230103zt	Delta	2021-07-06
hCoV-19/Denmark/DCGC-125241/2021	EPI_ISL_2896610	EPI_SET_230103zt	Delta	2021-07-07
hCoV-19/Denmark/DCGC-125309/2021	EPI_ISL_2896663	EPI_SET_230103zt	Delta	2021-07-07
hCoV-19/Denmark/DCGC-125312/2021	EPI_ISL_2896665	EPI_SET_230103zt	Delta	2021-07-07
hCoV-19/Denmark/DCGC-125337/2021	EPI_ISL_2896686	EPI_SET_230103zt	Delta	2021-07-06
hCoV-19/Denmark/DCGC-125345/2021	EPI_ISL_2896691	EPI_SET_230103zt	Delta	2021-07-07
hCoV-19/Denmark/DCGC-125350/2021	EPI_ISL_2896695	EPI_SET_230103zt	Delta	2021-07-06
hCoV-19/Denmark/DCGC-125370/2021	EPI_ISL_2896710	EPI_SET_230103zt	Delta	2021-07-02
hCoV-19/Denmark/DCGC-125401/2021	EPI_ISL_2896737	EPI_SET_230103zt	Delta	2021-07-07
hCoV-19/Denmark/DCGC-125425/2021	EPI_ISL_2896754	EPI_SET_230103zt	Delta	2021-07-06
hCoV-19/Denmark/DCGC-125434/2021	EPI_ISL_2896761	EPI_SET_230103zt	Delta	2021-07-07
hCoV-19/Denmark/DCGC-125441/2021	EPI_ISL_2896766	EPI_SET_230103zt	Delta	2021-07-07
hCoV-19/Denmark/DCGC-125442/2021	EPI_ISL_2896767	EPI_SET_230103mu	Alpha	2021-07-06
hCoV-19/Denmark/DCGC-125446/2021	EPI_ISL_2896770	EPI_SET_230103zt	Delta	2021-07-07
hCoV-19/Denmark/DCGC-125463/2021	EPI_ISL_2896784	EPI_SET_230103zt	Delta	2021-07-07
hCoV-19/Denmark/DCGC-125471/2021	EPI_ISL_2896791	EPI_SET_230103zt	Delta	2021-07-06
hCoV-19/Denmark/DCGC-125473/2021	EPI_ISL_2896793	EPI_SET_230103zt	Delta	2021-07-06
hCoV-19/Denmark/DCGC-125477/2021	EPI_ISL_2896797	EPI_SET_230103zt	Delta	2021-07-06
hCoV-19/Denmark/DCGC-125479/2021	EPI_ISL_2896799	EPI_SET_230103zt	Delta	2021-07-07
hCoV-19/Denmark/DCGC-125483/2021	EPI_ISL_2896803	EPI_SET_230103zt	Delta	2021-07-06
hCoV-19/Denmark/DCGC-125508/2021	EPI_ISL_2896842	EPI_SET_230103zt	Delta	2021-07-06
hCoV-19/Denmark/DCGC-125515/2021	EPI_ISL_2896847	EPI_SET_230103zt	Delta	2021-07-07
hCoV-19/Denmark/DCGC-125538/2021	EPI_ISL_2896865	EPI_SET_230103zt	Delta	2021-07-06
hCoV-19/Denmark/DCGC-125546/2021	EPI_ISL_2896871	EPI_SET_230103zt	Delta	2021-07-07
hCoV-19/Denmark/DCGC-125564/2021	EPI_ISL_2896887	EPI_SET_230103zt	Delta	2021-07-07
hCoV-19/Denmark/DCGC-125574/2021	EPI_ISL_2896895	EPI_SET_230103zt	Delta	2021-07-07
hCoV-19/Denmark/DCGC-125585/2021	EPI_ISL_2896906	EPI_SET_230103zt	Delta	2021-07-06
hCoV-19/Denmark/DCGC-125607/2021	EPI_ISL_2896923	EPI_SET_230103mu	Alpha	2021-07-06
hCoV-19/Denmark/DCGC-125615/2021	EPI_ISL_2896929	EPI_SET_230103zt	Delta	2021-07-06
hCoV-19/Denmark/DCGC-125652/2021	EPI_ISL_2932752	EPI_SET_230103mu	Alpha	2021-07-08
hCoV-19/Denmark/DCGC-125653/2021	EPI_ISL_2932753	EPI_SET_230103mu	Alpha	2021-07-08
hCoV-19/Denmark/DCGC-125657/2021	EPI_ISL_2932757	EPI_SET_230103zt	Delta	2021-07-08
hCoV-19/Denmark/DCGC-125840/2021	EPI_ISL_2932903	EPI_SET_230103zt	Delta	2021-07-08
hCoV-19/Denmark/DCGC-125863/2021	EPI_ISL_3076433	EPI_SET_230103mu	Alpha	2021-07-08
hCoV-19/Denmark/DCGC-125909/2021	EPI_ISL_2932960	EPI_SET_230103mu	Alpha	2021-07-08
hCoV-19/Denmark/DCGC-125926/2021	EPI_ISL_2932973	EPI_SET_230103zt	Delta	2021-07-08
hCoV-19/Denmark/DCGC-126012/2021	EPI_ISL_2933043	EPI_SET_230103zt	Delta	2021-07-08
hCoV-19/Denmark/DCGC-126045/2021	EPI_ISL_2933067	EPI_SET_230103zt	Delta	2021-07-07
hCoV-19/Denmark/DCGC-126071/2021	EPI_ISL_2933089	EPI_SET_230103zt	Delta	2021-07-08
hCoV-19/Denmark/DCGC-126097/2021	EPI_ISL_2963523	EPI_SET_230103zt	Delta	2021-07-09
hCoV-19/Denmark/DCGC-126110/2021	EPI_ISL_2963531	EPI_SET_230103zt	Delta	2021-07-10
hCoV-19/Denmark/DCGC-126114/2021	EPI_ISL_2963535	EPI_SET_230103zt	Delta	2021-07-10
hCoV-19/Denmark/DCGC-126122/2021	EPI_ISL_2963542	EPI_SET_230103zt	Delta	2021-07-11
hCoV-19/Denmark/DCGC-126154/2021	EPI_ISL_2963568	EPI_SET_230103zt	Delta	2021-07-10
hCoV-19/Denmark/DCGC-126159/2021	EPI_ISL_2963573	EPI_SET_230103zt	Delta	2021-07-10
hCoV-19/Denmark/DCGC-126161/2021	EPI_ISL_2963574	EPI_SET_230103zt	Delta	2021-07-09
hCoV-19/Denmark/DCGC-126162/2021	EPI_ISL_2963575	EPI_SET_230103zt	Delta	2021-07-10
hCoV-19/Denmark/DCGC-126181/2021	EPI_ISL_2963593	EPI_SET_230103zt	Delta	2021-07-11
hCoV-19/Denmark/DCGC-126187/2021	EPI_ISL_2963597	EPI_SET_230103zt	Delta	2021-07-10
hCoV-19/Denmark/DCGC-126199/2021	EPI_ISL_2963605	EPI_SET_230103zt	Delta	2021-07-10
hCoV-19/Denmark/DCGC-126222/2021	EPI_ISL_2963624	EPI_SET_230103mu	Alpha	2021-07-10
hCoV-19/Denmark/DCGC-126250/2021	EPI_ISL_2963643	EPI_SET_230103zt	Delta	2021-07-11
hCoV-19/Denmark/DCGC-126252/2021	EPI_ISL_2963645	EPI_SET_230103zt	Delta	2021-07-10
hCoV-19/Denmark/DCGC-126266/2021	EPI_ISL_2963656	EPI_SET_230103zt	Delta	2021-07-09
hCoV-19/Denmark/DCGC-126267/2021	EPI_ISL_2963657	EPI_SET_230103zt	Delta	2021-07-11
hCoV-19/Denmark/DCGC-126271/2021	EPI_ISL_2963661	EPI_SET_230103mu	Alpha	2021-07-10
hCoV-19/Denmark/DCGC-126275/2021	EPI_ISL_2963665	EPI_SET_230103zt	Delta	2021-07-10
hCoV-19/Denmark/DCGC-126276/2021	EPI_ISL_2963666	EPI_SET_230103zt	Delta	2021-07-08
hCoV-19/Denmark/DCGC-126283/2021	EPI_ISL_2963673	EPI_SET_230103zt	Delta	2021-07-11
hCoV-19/Denmark/DCGC-126290/2021	EPI_ISL_2963680	EPI_SET_230103zt	Delta	2021-07-11
hCoV-19/Denmark/DCGC-126336/2021	EPI_ISL_2963715	EPI_SET_230103zt	Delta	2021-07-10
hCoV-19/Denmark/DCGC-126353/2021	EPI_ISL_2963730	EPI_SET_230103zt	Delta	2021-07-10
hCoV-19/Denmark/DCGC-126356/2021	EPI_ISL_2963733	EPI_SET_230103zt	Delta	2021-07-09
hCoV-19/Denmark/DCGC-126372/2021	EPI_ISL_2963749	EPI_SET_230103zt	Delta	2021-07-11
hCoV-19/Denmark/DCGC-126378/2021	EPI_ISL_2963755	EPI_SET_230103zt	Delta	2021-07-11
hCoV-19/Denmark/DCGC-126387/2021	EPI_ISL_2963764	EPI_SET_230103zt	Delta	2021-07-10
hCoV-19/Denmark/DCGC-126391/2021	EPI_ISL_2963768	EPI_SET_230103zt	Delta	2021-07-10
hCoV-19/Denmark/DCGC-126396/2021	EPI_ISL_2963772	EPI_SET_230103zt	Delta	2021-07-11
hCoV-19/Denmark/DCGC-126417/2021	EPI_ISL_2963790	EPI_SET_230103zt	Delta	2021-07-10
hCoV-19/Denmark/DCGC-126428/2021	EPI_ISL_2963798	EPI_SET_230103zt	Delta	2021-07-09
hCoV-19/Denmark/DCGC-126442/2021	EPI_ISL_2963809	EPI_SET_230103zt	Delta	2021-07-10
hCoV-19/Denmark/DCGC-126446/2021	EPI_ISL_2963812	EPI_SET_230103zt	Delta	2021-07-09
hCoV-19/Denmark/DCGC-126450/2021	EPI_ISL_2963816	EPI_SET_230103zt	Delta	2021-07-10
hCoV-19/Denmark/DCGC-126460/2021	EPI_ISL_2963826	EPI_SET_230103zt	Delta	2021-07-09
hCoV-19/Denmark/DCGC-126467/2021	EPI_ISL_2963833	EPI_SET_230103zt	Delta	2021-07-10
hCoV-19/Denmark/DCGC-126475/2021	EPI_ISL_2963841	EPI_SET_230103zt	Delta	2021-07-11
hCoV-19/Denmark/DCGC-126485/2021	EPI_ISL_2963849	EPI_SET_230103mu	Alpha	2021-07-10
hCoV-19/Denmark/DCGC-126486/2021	EPI_ISL_2963850	EPI_SET_230103zt	Delta	2021-07-09
hCoV-19/Denmark/DCGC-126493/2021	EPI_ISL_2963856	EPI_SET_230103zt	Delta	2021-07-10
hCoV-19/Denmark/DCGC-126501/2021	EPI_ISL_2963862	EPI_SET_230103zt	Delta	2021-07-09
hCoV-19/Denmark/DCGC-126538/2021	EPI_ISL_2963891	EPI_SET_230103zt	Delta	2021-07-10
hCoV-19/Denmark/DCGC-126544/2021	EPI_ISL_2963896	EPI_SET_230103zt	Delta	2021-07-11
hCoV-19/Denmark/DCGC-126545/2021	EPI_ISL_2963897	EPI_SET_230103zt	Delta	2021-07-10
hCoV-19/Denmark/DCGC-126551/2021	EPI_ISL_2963901	EPI_SET_230103zt	Delta	2021-07-10
hCoV-19/Denmark/DCGC-126565/2021	EPI_ISL_2963913	EPI_SET_230103zt	Delta	2021-07-09
hCoV-19/Denmark/DCGC-126567/2021	EPI_ISL_2963914	EPI_SET_230103zt	Delta	2021-07-09
hCoV-19/Denmark/DCGC-126582/2021	EPI_ISL_2963925	EPI_SET_230103zt	Delta	2021-07-10
hCoV-19/Denmark/DCGC-126597/2021	EPI_ISL_2963937	EPI_SET_230103zt	Delta	2021-07-10
hCoV-19/Denmark/DCGC-126602/2021	EPI_ISL_2963942	EPI_SET_230103zt	Delta	2021-07-09
hCoV-19/Denmark/DCGC-126619/2021	EPI_ISL_2963952	EPI_SET_230103zt	Delta	2021-07-11
hCoV-19/Denmark/DCGC-126632/2021	EPI_ISL_2963959	EPI_SET_230103mu	Alpha	2021-07-10
hCoV-19/Denmark/DCGC-126648/2021	EPI_ISL_2963974	EPI_SET_230103zt	Delta	2021-07-09
hCoV-19/Denmark/DCGC-126652/2021	EPI_ISL_2963977	EPI_SET_230103zt	Delta	2021-07-11
hCoV-19/Denmark/DCGC-126656/2021	EPI_ISL_2963981	EPI_SET_230103zt	Delta	2021-07-09
hCoV-19/Denmark/DCGC-126657/2021	EPI_ISL_2963982	EPI_SET_230103zt	Delta	2021-07-11
hCoV-19/Denmark/DCGC-126660/2021	EPI_ISL_2963985	EPI_SET_230103zt	Delta	2021-07-09
hCoV-19/Denmark/DCGC-126669/2021	EPI_ISL_2963994	EPI_SET_230103zt	Delta	2021-07-10
hCoV-19/Denmark/DCGC-126683/2021	EPI_ISL_2964008	EPI_SET_230103zt	Delta	2021-07-09
hCoV-19/Denmark/DCGC-126694/2021	EPI_ISL_2964016	EPI_SET_230103zt	Delta	2021-07-09
hCoV-19/Denmark/DCGC-126711/2021	EPI_ISL_2964028	EPI_SET_230103zt	Delta	2021-07-11
hCoV-19/Denmark/DCGC-126717/2021	EPI_ISL_2964033	EPI_SET_230103zt	Delta	2021-07-11
hCoV-19/Denmark/DCGC-126721/2021	EPI_ISL_2964036	EPI_SET_230103zt	Delta	2021-07-11
hCoV-19/Denmark/DCGC-126722/2021	EPI_ISL_2964037	EPI_SET_230103zt	Delta	2021-07-09
hCoV-19/Denmark/DCGC-126727/2021	EPI_ISL_2964039	EPI_SET_230103zt	Delta	2021-07-09
hCoV-19/Denmark/DCGC-126739/2021	EPI_ISL_2964048	EPI_SET_230103zt	Delta	2021-07-09
hCoV-19/Denmark/DCGC-126776/2021	EPI_ISL_2964078	EPI_SET_230103zt	Delta	2021-07-10
[truncated: 10,325 more rows]
