# Supplementary material for: Comparative subgenomic mRNA profiles of SARS-CoV-2 Alpha, Delta and Omicron BA.1, BA.2 and BA.5 sub-lineages using Danish COVID-19 genomic surveillance data
Source: Research Square preprint supplement (doi:10.21203/rs.3.rs-2542939/v1), 2023-02-03
Supplement: Supplementary file 4 [file c0bc12c10eddb222ce120aea.xlsx]

## Sheet: Sheet1
Newly admitted	Information on hospitalizations related to episode.
Have symptoms STPS	Information of patient has/had symptoms or not. Information based on patient interview performed by Danish Patient Safety Authority (STPS)
RUKS Asthma	Patient has asthma according to RUKS database (National registry of chronic disease and severe mental disorders)
RUKS Diabetes type 1	Patient has type 1 diabetes according to RUKS database (National registry of chronic disease and severe mental disorders)
RUKS Diabetes type 2	Patient has type 2 diabetes according to RUKS database (National registry of chronic disease and severe mental disorders)
RUKS KOL (Chronic obstructive pulmorary)	Patient has chronic obstructive pulmonary disease according to RUKS database (National registry of chronic disease and severe mental disorders)
Diabetes	Diabetes associated disease codes found up to 5 years from the sampling date in the national patient registry (LPR: the national patient registry)
Adipositas	ICD10-codes E65-E68 up to 5 years from the sampling date in the national patient registry (LPR: the national patient registry)
Cancer	ICD10-codes Z85 up to 5 years from the sampling date in the national patient registry (LPR: the national patient registry)
Neurodegenerative	ICD10-codes G10-G14, G20-G23, G35-G37, G71-G73, G80-G83, G90-G91, G93-G96 G99, M51, excluding G360 eller G902 up to 5 years from sampling date in the national patient registry (LPR: the national patient registry)
Kidney	ICD10-codes N18-N200Y, Z992 up to 5 years from the sampling date in the national patient registry (LPR: the national patient registry)
Hematopeitic cancer	ICD10-codes Z856-Z857, C81-C96 up to 5 years from the sampling date in the national patient registry (LPR: the national patient registry)
Cardiovascular	key words search in health record: ‘Hjerte’ (heart), ‘ihd’ (ischemic heart disease), ‘valvul’ (valve), ‘hyper’ (hypertension)
Respiratory	key word search in health record: ‘Kol’ (chronic obstructive lung disease), ‘luftvej’ (air way)
Immune	Key word search in health record: ‘Hiv’, ‘immun’ (immune), ‘irradia’ (irradiation), ‘transpl’ (transplant)
Vaccination status	Information on the patients' vaccination status: not vaccinated, started primary program, primary full program, booster
