# Supplementary material for: Comparative subgenomic mRNA profiles of SARS-CoV-2 Alpha, Delta and Omicron BA.1, BA.2 and BA.5 sub-lineages using Danish COVID-19 genomic surveillance data
Source: Research Square preprint supplement (doi:10.21203/rs.3.rs-2542939/v1), 2023-02-03
Supplement: Supplementary file 5 [file e1649c05f587e1200bf98697.xlsx]

## Sheet: Sheet1
	Estimate	Std. Error	Lower 95% CI	Upper 95% CI	t value	Pr(>|t|)
(Intercept)	5.57	0.201	5.176	5.964	27.691	<2e-16
LineageAlpha	1.963	0.085	1.796	2.129	23.103	<2e-16
SiteORF9	4.78	0.102	4.58	4.981	46.785	<2e-16
SiteM	2.499	0.102	2.299	2.7	24.46	<2e-16
SiteE	-1.927	0.102	-2.127	-1.726	-18.856	<2e-16
SiteORF3a	-2.149	0.102	-2.349	-1.949	-21.03	<2e-16
SiteORF8	-2.198	0.102	-2.398	-1.998	-21.509	<2e-16
SiteORF7a	-1.978	0.102	-2.178	-1.778	-19.358	<2e-16
SiteORF6	0.154	0.102	-0.047	0.354	1.503	0.1327
Ct	-0.09	0.006	-0.103	-0.078	-13.975	<2e-16
LineageLateDelta	-0.182	0.083	-0.345	-0.019	-2.193	0.0283
LineageDelta	-0.15	0.079	-0.305	0.004	-1.904	0.0569
Vaccination status no	0.122	0.067	-0.009	0.253	1.82	0.0688
Vaccination status primary full program	-0.081	0.084	-0.246	0.085	-0.956	0.339
